# Supplementary material for: Effect of isolation on coat colour polymorphism of Polynesian rats in Island Southeast Asia and the Pacific
Source: PubMed Central journal article supplement (PMC6511229; doi:10.7717/peerj.6894), 2019-05-08
Supplement: peerj-07-6894-s001.pdf [file peerj-07-6894-s001.pdf]

Effect of isolation on coat colour polymorphism of wild populations of  
Polynesian rats (*Rattus exulans*) in Island Southeast Asia and the Pacific

Alexandra A.E. van der Geer

Naturalis Biodiversity Center  
Leiden  
the Netherlands

[alexandra.vandergeer@naturalis.nl](mailto:alexandra.vandergeer@naturalis.nl)

DATA FILE S1

This file contains specimen numbers of skins of *Rattus exulans* examined at the American Museum of Natural History (New York; AMNH), the Smithsonian Institute, Natural History Museum (Washington; USNM) and Te Papa Tongarewa Museum of New Zealand (Wellington; NMNZ).

| <b>Institute</b> | <b>Specimen</b> | <b>Island</b>     | <b>Sex</b> | <b>Biogeographical region</b> |
|------------------|-----------------|-------------------|------------|-------------------------------|
| AMNH             | M-267705        | Ambon             | Female     | Wallacea                      |
| AMNH             | M-102154        | Bali              | Female     | Lesser Sunda Islands          |
| AMNH             | M-107976        | Bali              | Female     | Lesser Sunda Islands          |
| AMNH             | M-103508        | Borneo            | Female     | Greater Sunda Islands         |
| AMNH             | M-103509        | Borneo            | Female     | Greater Sunda Islands         |
| AMNH             | M-103510        | Borneo            | Female     | Greater Sunda Islands         |
| AMNH             | M-103511        | Borneo            | Female     | Greater Sunda Islands         |
| AMNH             | M-103512        | Borneo            | Female     | Greater Sunda Islands         |
| AMNH             | M-103513        | Borneo            | Female     | Greater Sunda Islands         |
| AMNH             | M-103514        | Borneo            | Female     | Greater Sunda Islands         |
| AMNH             | M-103515        | Borneo            | Female     | Greater Sunda Islands         |
| AMNH             | M-103517        | Borneo            | Female     | Greater Sunda Islands         |
| AMNH             | M-103827        | Borneo            | Female     | Greater Sunda Islands         |
| AMNH             | M-103828        | Borneo            | Female     | Greater Sunda Islands         |
| AMNH             | M-103831        | Borneo            | Female     | Greater Sunda Islands         |
| AMNH             | M-103832        | Borneo            | Female     | Greater Sunda Islands         |
| AMNH             | M-103834        | Borneo            | Female     | Greater Sunda Islands         |
| AMNH             | M-103835        | Borneo            | Female     | Greater Sunda Islands         |
| AMNH             | M-103836        | Borneo            | Female     | Greater Sunda Islands         |
| AMNH             | M-103837        | Borneo            | Female     | Greater Sunda Islands         |
| AMNH             | M-103838        | Borneo            | Female     | Greater Sunda Islands         |
| AMNH             | M-103839        | Borneo            | Female     | Greater Sunda Islands         |
| AMNH             | M-103840        | Borneo            | Female     | Greater Sunda Islands         |
| AMNH             | M-103926        | Borneo            | Female     | Greater Sunda Islands         |
| AMNH             | M-103927        | Borneo            | Female     | Greater Sunda Islands         |
| AMNH             | M-103930        | Borneo            | Female     | Greater Sunda Islands         |
| AMNH             | M-106126        | Borneo            | Female     | Greater Sunda Islands         |
| AMNH             | M-106128        | Borneo            | Female     | Greater Sunda Islands         |
| AMNH             | M-106192        | Borneo            | Female     | Greater Sunda Islands         |
| AMNH             | M-106193        | Borneo            | Female     | Greater Sunda Islands         |
| AMNH             | M-106195        | Borneo            | Female     | Greater Sunda Islands         |
| AMNH             | M-106196        | Borneo            | Female     | Greater Sunda Islands         |
| AMNH             | M-106197        | Borneo            | Female     | Greater Sunda Islands         |
| AMNH             | M-106199        | Borneo            | Female     | Greater Sunda Islands         |
| AMNH             | M-106200        | Borneo            | Female     | Greater Sunda Islands         |
| AMNH             | M-106206        | Borneo            | Female     | Greater Sunda Islands         |
| AMNH             | M-107025        | Borneo            | Female     | Greater Sunda Islands         |
| AMNH             | M-107026        | Borneo            | Female     | Greater Sunda Islands         |
| AMNH             | M-107027        | Borneo            | Female     | Greater Sunda Islands         |
| AMNH             | M-107031        | Borneo            | Female     | Greater Sunda Islands         |
| AMNH             | M-107034        | Borneo            | Female     | Greater Sunda Islands         |
| AMNH             | M-107035        | Borneo            | Female     | Greater Sunda Islands         |
| AMNH             | M-107037        | Borneo            | Female     | Greater Sunda Islands         |
| AMNH             | M-107045        | Borneo            | Female     | Greater Sunda Islands         |
| AMNH             | M-107047        | Borneo            | Female     | Greater Sunda Islands         |
| AMNH             | M-107048        | Borneo            | Female     | Greater Sunda Islands         |
| AMNH             | M-107049        | Borneo            | Female     | Greater Sunda Islands         |
| AMNH             | M-163811        | Burma             | Female     | Mainland                      |
| AMNH             | M-163812        | Burma             | Female     | Mainland                      |
| AMNH             | M-163814        | Burma             | Female     | Mainland                      |
| AMNH             | M-159741        | Fergusson Island  | Female     | Melanesia                     |
| AMNH             | M-159742        | Fergusson Island  | Female     | Melanesia                     |
| AMNH             | M-159743        | Fergusson Island  | Female     | Melanesia                     |
| AMNH             | M-157935        | Goodenough Island | Female     | Melanesia                     |
| AMNH             | M-157936        | Goodenough Island | Female     | Melanesia                     |
| AMNH             | M-157937        | Goodenough Island | Female     | Melanesia                     |
| AMNH             | M-157938        | Goodenough Island | Female     | Melanesia                     |
| AMNH             | M-157939        | Goodenough Island | Female     | Melanesia                     |
| AMNH             | M-157940        | Goodenough Island | Female     | Melanesia                     |
| AMNH             | M-157941        | Goodenough Island | Female     | Melanesia                     |
| AMNH             | M-157944        | Goodenough Island | Female     | Melanesia                     |
| AMNH             | M-157945        | Goodenough Island | Female     | Melanesia                     |
| AMNH             | M-157946        | Goodenough Island | Female     | Melanesia                     |
| AMNH             | M-157947        | Goodenough Island | Female     | Melanesia                     |
| AMNH             | M-101297        | Halmahera         | Female     | Wallacea                      |
| AMNH             | M-101301        | Halmahera         | Female     | Wallacea                      |

| <b>Institute</b> | <b>Specimen</b> | <b>Island</b>      | <b>Sex</b> | <b>Biogeographical region</b> |
|------------------|-----------------|--------------------|------------|-------------------------------|
| AMNH             | M-101306        | Halmahera          | Female     | Wallacea                      |
| AMNH             | M-267656        | Halmahera          | Female     | Wallacea                      |
| AMNH             | M-267658        | Halmahera          | Female     | Wallacea                      |
| AMNH             | M-267682        | Halmahera          | Female     | Wallacea                      |
| AMNH             | M-267685        | Halmahera          | Female     | Wallacea                      |
| AMNH             | M-267690        | Halmahera          | Female     | Wallacea                      |
| AMNH             | M-267691        | Halmahera          | Female     | Wallacea                      |
| AMNH             | M-267696        | Halmahera          | Female     | Wallacea                      |
| AMNH             | M-143882        | Hawaii             | Female     | Polynesia                     |
| AMNH             | M-143883        | Hawaii             | Female     | Polynesia                     |
| AMNH             | M-102004        | Java               | Female     | Greater Sunda Islands         |
| AMNH             | M-106690        | Java               | Female     | Greater Sunda Islands         |
| AMNH             | M-68741         | Kanton Island      | Female     | Micronesia                    |
| AMNH             | M-159730        | Kiriwina Island    | Female     | Melanesia                     |
| AMNH             | M-159731        | Kiriwina Island    | Female     | Melanesia                     |
| AMNH             | M-184590        | Luzon              | Female     | Wallacea                      |
| AMNH             | M-187185        | Luzon              | Female     | Wallacea                      |
| AMNH             | M-187189        | Luzon              | Female     | Wallacea                      |
| AMNH             | M-187195        | Luzon              | Female     | Wallacea                      |
| AMNH             | M-187196        | Luzon              | Female     | Wallacea                      |
| AMNH             | M-153292        | Malenge Island     | Female     | Wallacea                      |
| AMNH             | M-153293        | Malenge Island     | Female     | Wallacea                      |
| AMNH             | M-153294        | Malenge Island     | Female     | Wallacea                      |
| AMNH             | M-153295        | Malenge Island     | Female     | Wallacea                      |
| AMNH             | M-153301        | Malenge Island     | Female     | Wallacea                      |
| AMNH             | M-153303        | Malenge Island     | Female     | Wallacea                      |
| AMNH             | M-153305        | Malenge Island     | Female     | Wallacea                      |
| AMNH             | M-153306        | Malenge Island     | Female     | Wallacea                      |
| AMNH             | M-153310        | Malenge Island     | Female     | Wallacea                      |
| AMNH             | M-153311        | Malenge Island     | Female     | Wallacea                      |
| AMNH             | M-153314        | Malenge Island     | Female     | Wallacea                      |
| AMNH             | M-159733        | Misima Island      | Female     | Melanesia                     |
| AMNH             | M-159734        | Misima Island      | Female     | Melanesia                     |
| AMNH             | M-159735        | Misima Island      | Female     | Melanesia                     |
| AMNH             | M-207544        | Negros             | Female     | Wallacea                      |
| AMNH             | M-207547        | Negros             | Female     | Wallacea                      |
| AMNH             | M-207551        | Negros             | Female     | Wallacea                      |
| AMNH             | M-207552        | Negros             | Female     | Wallacea                      |
| AMNH             | M-207553        | Negros             | Female     | Wallacea                      |
| AMNH             | M-194383        | New Britain Island | Female     | Melanesia                     |
| AMNH             | M-194384        | New Britain Island | Female     | Melanesia                     |
| AMNH             | M-194385        | New Britain Island | Female     | Melanesia                     |
| AMNH             | M-194388        | New Britain Island | Female     | Melanesia                     |
| AMNH             | M-194390        | New Britain Island | Female     | Melanesia                     |
| AMNH             | M-194392        | New Britain Island | Female     | Melanesia                     |
| AMNH             | M-194393        | New Britain Island | Female     | Melanesia                     |
| AMNH             | M-194394        | New Britain Island | Female     | Melanesia                     |
| AMNH             | M-222325        | New Britain Island | Female     | Melanesia                     |
| AMNH             | M-222326        | New Britain Island | Female     | Melanesia                     |
| AMNH             | M-222327        | New Britain Island | Female     | Melanesia                     |
| AMNH             | M-222330        | New Britain Island | Female     | Melanesia                     |
| AMNH             | M-222332        | New Britain Island | Female     | Melanesia                     |
| AMNH             | M-222333        | New Britain Island | Female     | Melanesia                     |
| AMNH             | M-222402        | New Britain Island | Female     | Melanesia                     |
| AMNH             | M-104237        | New Guinea         | Female     | Melanesia                     |
| AMNH             | M-104247        | New Guinea         | Female     | Melanesia                     |
| AMNH             | M-108216        | New Guinea         | Female     | Melanesia                     |
| AMNH             | M-108222        | New Guinea         | Female     | Melanesia                     |
| AMNH             | M-108223        | New Guinea         | Female     | Melanesia                     |
| AMNH             | M-108224        | New Guinea         | Female     | Melanesia                     |
| AMNH             | M-108225        | New Guinea         | Female     | Melanesia                     |
| AMNH             | M-110089        | New Guinea         | Female     | Melanesia                     |
| AMNH             | M-110092        | New Guinea         | Female     | Melanesia                     |
| AMNH             | M-110098        | New Guinea         | Female     | Melanesia                     |
| AMNH             | M-110099        | New Guinea         | Female     | Melanesia                     |
| AMNH             | M-110102        | New Guinea         | Female     | Melanesia                     |

| <b>Institute</b> | <b>Specimen</b> | <b>Island</b> | <b>Sex</b> | <b>Biogeographical region</b> |
|------------------|-----------------|---------------|------------|-------------------------------|
| AMNH             | M-110108        | New Guinea    | Female     | Melanesia                     |
| AMNH             | M-110109        | New Guinea    | Female     | Melanesia                     |
| AMNH             | M-110117        | New Guinea    | Female     | Melanesia                     |
| AMNH             | M-157873        | New Guinea    | Female     | Melanesia                     |
| AMNH             | M-157874        | New Guinea    | Female     | Melanesia                     |
| AMNH             | M-157875        | New Guinea    | Female     | Melanesia                     |
| AMNH             | M-157876        | New Guinea    | Female     | Melanesia                     |
| AMNH             | M-157877        | New Guinea    | Female     | Melanesia                     |
| AMNH             | M-157878        | New Guinea    | Female     | Melanesia                     |
| AMNH             | M-157879        | New Guinea    | Female     | Melanesia                     |
| AMNH             | M-157880        | New Guinea    | Female     | Melanesia                     |
| AMNH             | M-157881        | New Guinea    | Female     | Melanesia                     |
| AMNH             | M-157917        | New Guinea    | Female     | Melanesia                     |
| AMNH             | M-157918        | New Guinea    | Female     | Melanesia                     |
| AMNH             | M-157919        | New Guinea    | Female     | Melanesia                     |
| AMNH             | M-157921        | New Guinea    | Female     | Melanesia                     |
| AMNH             | M-157922        | New Guinea    | Female     | Melanesia                     |
| AMNH             | M-157923        | New Guinea    | Female     | Melanesia                     |
| AMNH             | M-157924        | New Guinea    | Female     | Melanesia                     |
| AMNH             | M-191547        | New Guinea    | Female     | Melanesia                     |
| AMNH             | M-191548        | New Guinea    | Female     | Melanesia                     |
| AMNH             | M-191549        | New Guinea    | Female     | Melanesia                     |
| AMNH             | M-191550        | New Guinea    | Female     | Melanesia                     |
| AMNH             | M-191551        | New Guinea    | Female     | Melanesia                     |
| AMNH             | M-191552        | New Guinea    | Female     | Melanesia                     |
| AMNH             | M-191553        | New Guinea    | Female     | Melanesia                     |
| AMNH             | M-191554        | New Guinea    | Female     | Melanesia                     |
| AMNH             | M-191555        | New Guinea    | Female     | Melanesia                     |
| AMNH             | M-191556        | New Guinea    | Female     | Melanesia                     |
| AMNH             | M-191565        | New Guinea    | Female     | Melanesia                     |
| AMNH             | M-191566        | New Guinea    | Female     | Melanesia                     |
| AMNH             | M-191567        | New Guinea    | Female     | Melanesia                     |
| AMNH             | M-191568        | New Guinea    | Female     | Melanesia                     |
| AMNH             | M-191573        | New Guinea    | Female     | Melanesia                     |
| AMNH             | M-191574        | New Guinea    | Female     | Melanesia                     |
| AMNH             | M-191575        | New Guinea    | Female     | Melanesia                     |
| AMNH             | M-191576        | New Guinea    | Female     | Melanesia                     |
| AMNH             | M-191577        | New Guinea    | Female     | Melanesia                     |
| AMNH             | M-191589        | New Guinea    | Female     | Melanesia                     |
| AMNH             | M-191590        | New Guinea    | Female     | Melanesia                     |
| AMNH             | M-191591        | New Guinea    | Female     | Melanesia                     |
| AMNH             | M-191592        | New Guinea    | Female     | Melanesia                     |
| AMNH             | M-191593        | New Guinea    | Female     | Melanesia                     |
| AMNH             | M-191594        | New Guinea    | Female     | Melanesia                     |
| AMNH             | M-191598        | New Guinea    | Female     | Melanesia                     |
| AMNH             | M-191602        | New Guinea    | Female     | Melanesia                     |
| AMNH             | M-191603        | New Guinea    | Female     | Melanesia                     |
| AMNH             | M-191604        | New Guinea    | Female     | Melanesia                     |
| AMNH             | M-191605        | New Guinea    | Female     | Melanesia                     |
| AMNH             | M-191606        | New Guinea    | Female     | Melanesia                     |
| AMNH             | M-191607        | New Guinea    | Female     | Melanesia                     |
| AMNH             | M-191615        | New Guinea    | Female     | Melanesia                     |
| AMNH             | M-191616        | New Guinea    | Female     | Melanesia                     |
| AMNH             | M-191617        | New Guinea    | Female     | Melanesia                     |
| AMNH             | M-191618        | New Guinea    | Female     | Melanesia                     |
| AMNH             | M-195044        | New Guinea    | Female     | Melanesia                     |
| AMNH             | M-195047        | New Guinea    | Female     | Melanesia                     |
| AMNH             | M-195048        | New Guinea    | Female     | Melanesia                     |
| AMNH             | M-195049        | New Guinea    | Female     | Melanesia                     |
| AMNH             | M-195050        | New Guinea    | Female     | Melanesia                     |
| AMNH             | M-195051        | New Guinea    | Female     | Melanesia                     |
| AMNH             | M-195053        | New Guinea    | Female     | Melanesia                     |
| AMNH             | M-195054        | New Guinea    | Female     | Melanesia                     |
| AMNH             | M-195059        | New Guinea    | Female     | Melanesia                     |
| AMNH             | M-195060        | New Guinea    | Female     | Melanesia                     |
| AMNH             | M-195062        | New Guinea    | Female     | Melanesia                     |

| <b>Institute</b> | <b>Specimen</b> | <b>Island</b>   | <b>Sex</b> | <b>Biogeographical region</b> |
|------------------|-----------------|-----------------|------------|-------------------------------|
| AMNH             | M-195064        | New Guinea      | Female     | Melanesia                     |
| AMNH             | M-195067        | New Guinea      | Female     | Melanesia                     |
| AMNH             | M-195068        | New Guinea      | Female     | Melanesia                     |
| AMNH             | M-195069        | New Guinea      | Female     | Melanesia                     |
| AMNH             | M-195070        | New Guinea      | Female     | Melanesia                     |
| AMNH             | M-195074        | New Guinea      | Female     | Melanesia                     |
| AMNH             | M-195075        | New Guinea      | Female     | Melanesia                     |
| AMNH             | M-195079        | New Guinea      | Female     | Melanesia                     |
| AMNH             | M-195081        | New Guinea      | Female     | Melanesia                     |
| AMNH             | M-195082        | New Guinea      | Female     | Melanesia                     |
| AMNH             | M-195088        | New Guinea      | Female     | Melanesia                     |
| AMNH             | M-195089        | New Guinea      | Female     | Melanesia                     |
| AMNH             | M-198798        | New Guinea      | Female     | Melanesia                     |
| AMNH             | M-198799        | New Guinea      | Female     | Melanesia                     |
| AMNH             | M-198800        | New Guinea      | Female     | Melanesia                     |
| AMNH             | M-198801        | New Guinea      | Female     | Melanesia                     |
| AMNH             | M-198807        | New Guinea      | Female     | Melanesia                     |
| AMNH             | M-198808        | New Guinea      | Female     | Melanesia                     |
| AMNH             | M-198809        | New Guinea      | Female     | Melanesia                     |
| AMNH             | M-198810        | New Guinea      | Female     | Melanesia                     |
| AMNH             | M-198811        | New Guinea      | Female     | Melanesia                     |
| AMNH             | M-198812        | New Guinea      | Female     | Melanesia                     |
| AMNH             | M-198813        | New Guinea      | Female     | Melanesia                     |
| AMNH             | M-222287        | New Guinea      | Female     | Melanesia                     |
| AMNH             | M-222288        | New Guinea      | Female     | Melanesia                     |
| AMNH             | M-222289        | New Guinea      | Female     | Melanesia                     |
| AMNH             | M-222291        | New Guinea      | Female     | Melanesia                     |
| AMNH             | M-222292        | New Guinea      | Female     | Melanesia                     |
| AMNH             | M-222296        | New Guinea      | Female     | Melanesia                     |
| AMNH             | M-222298        | New Guinea      | Female     | Melanesia                     |
| AMNH             | M-222300        | New Guinea      | Female     | Melanesia                     |
| AMNH             | M-222301        | New Guinea      | Female     | Melanesia                     |
| AMNH             | M-222305        | New Guinea      | Female     | Melanesia                     |
| AMNH             | M-222307        | New Guinea      | Female     | Melanesia                     |
| AMNH             | M-222310        | New Guinea      | Female     | Melanesia                     |
| AMNH             | M-222315        | New Guinea      | Female     | Melanesia                     |
| AMNH             | M-222317        | New Guinea      | Female     | Melanesia                     |
| AMNH             | M-222319        | New Guinea      | Female     | Melanesia                     |
| AMNH             | M-222322        | New Guinea      | Female     | Melanesia                     |
| AMNH             | M-222338        | New Guinea      | Female     | Melanesia                     |
| AMNH             | M-222342        | New Guinea      | Female     | Melanesia                     |
| AMNH             | M-222343        | New Guinea      | Female     | Melanesia                     |
| AMNH             | M-222345        | New Guinea      | Female     | Melanesia                     |
| AMNH             | M-222347        | New Guinea      | Female     | Melanesia                     |
| AMNH             | M-222348        | New Guinea      | Female     | Melanesia                     |
| AMNH             | M-222349        | New Guinea      | Female     | Melanesia                     |
| AMNH             | M-222351        | New Guinea      | Female     | Melanesia                     |
| AMNH             | M-222352        | New Guinea      | Female     | Melanesia                     |
| AMNH             | M-222355        | New Guinea      | Female     | Melanesia                     |
| AMNH             | M-222357        | New Guinea      | Female     | Melanesia                     |
| AMNH             | M-222358        | New Guinea      | Female     | Melanesia                     |
| AMNH             | M-222359        | New Guinea      | Female     | Melanesia                     |
| AMNH             | M-222360        | New Guinea      | Female     | Melanesia                     |
| AMNH             | M-222362        | New Guinea      | Female     | Melanesia                     |
| AMNH             | M-222366        | New Guinea      | Female     | Melanesia                     |
| AMNH             | M-222390        | New Guinea      | Female     | Melanesia                     |
| AMNH             | M-159758        | Normanby Island | Female     | Melanesia                     |
| AMNH             | M-159759        | Normanby Island | Female     | Melanesia                     |
| AMNH             | M-159760        | Normanby Island | Female     | Melanesia                     |
| AMNH             | M-159761        | Normanby Island | Female     | Melanesia                     |
| AMNH             | M-159762        | Normanby Island | Female     | Melanesia                     |
| AMNH             | M-159763        | Normanby Island | Female     | Melanesia                     |
| AMNH             | M-159764        | Normanby Island | Female     | Melanesia                     |
| AMNH             | M-159765        | Normanby Island | Female     | Melanesia                     |
| AMNH             | M-159766        | Normanby Island | Female     | Melanesia                     |
| AMNH             | M-159767        | Normanby Island | Female     | Melanesia                     |

| <b>Institute</b> | <b>Specimen</b> | <b>Island</b>   | <b>Sex</b> | <b>Biogeographical region</b> |
|------------------|-----------------|-----------------|------------|-------------------------------|
| AMNH             | M-159768        | Normanby Island | Female     | Melanesia                     |
| AMNH             | M-68748         | Ofu Island      | Female     | Polynesia                     |
| AMNH             | M-68740         | Orona Island    | Female     | Micronesia                    |
| AMNH             | M-207606        | Palawan         | Female     | Sunda                         |
| AMNH             | M-109171        | Peleng Island   | Female     | Wallacea                      |
| AMNH             | M-109172        | Peleng Island   | Female     | Wallacea                      |
| AMNH             | M-109173        | Peleng Island   | Female     | Wallacea                      |
| AMNH             | M-109174        | Peleng Island   | Female     | Wallacea                      |
| AMNH             | M-109175        | Peleng Island   | Female     | Wallacea                      |
| AMNH             | M-109181        | Peleng Island   | Female     | Wallacea                      |
| AMNH             | M-109182        | Peleng Island   | Female     | Wallacea                      |
| AMNH             | M-109183        | Peleng Island   | Female     | Wallacea                      |
| AMNH             | M-109184        | Peleng Island   | Female     | Wallacea                      |
| AMNH             | M-68747         | Rose Island     | Female     | Polynesia                     |
| AMNH             | M-159700        | Rossel Island   | Female     | Melanesia                     |
| AMNH             | M-159701        | Rossel Island   | Female     | Melanesia                     |
| AMNH             | M-159702        | Rossel Island   | Female     | Melanesia                     |
| AMNH             | M-159703        | Rossel Island   | Female     | Melanesia                     |
| AMNH             | M-159704        | Rossel Island   | Female     | Melanesia                     |
| AMNH             | M-159705        | Rossel Island   | Female     | Melanesia                     |
| AMNH             | M-159714        | Rossel Island   | Female     | Melanesia                     |
| AMNH             | M-159715        | Rossel Island   | Female     | Melanesia                     |
| AMNH             | M-159716        | Rossel Island   | Female     | Melanesia                     |
| AMNH             | M-159725        | Vanatinai       | Female     | Melanesia                     |
| AMNH             | M-159726        | Vanatinai       | Female     | Melanesia                     |
| AMNH             | M-159727        | Vanatinai       | Female     | Melanesia                     |
| AMNH             | M-159728        | Vanatinai       | Female     | Melanesia                     |
| AMNH             | M-100984        | Sulawesi        | Female     | Wallacea                      |
| AMNH             | M-100986        | Sulawesi        | Female     | Wallacea                      |
| AMNH             | M-100988        | Sulawesi        | Female     | Wallacea                      |
| AMNH             | M-100991        | Sulawesi        | Female     | Wallacea                      |
| AMNH             | M-101046        | Sulawesi        | Female     | Wallacea                      |
| AMNH             | M-101260        | Sulawesi        | Female     | Wallacea                      |
| AMNH             | M-101263        | Sulawesi        | Female     | Wallacea                      |
| AMNH             | M-101274        | Sulawesi        | Female     | Wallacea                      |
| AMNH             | M-153015        | Sulawesi        | Female     | Wallacea                      |
| AMNH             | M-153016        | Sulawesi        | Female     | Wallacea                      |
| AMNH             | M-153019        | Sulawesi        | Female     | Wallacea                      |
| AMNH             | M-153027        | Sulawesi        | Female     | Wallacea                      |
| AMNH             | M-153029        | Sulawesi        | Female     | Wallacea                      |
| AMNH             | M-153030        | Sulawesi        | Female     | Wallacea                      |
| AMNH             | M-153032        | Sulawesi        | Female     | Wallacea                      |
| AMNH             | M-153033        | Sulawesi        | Female     | Wallacea                      |
| AMNH             | M-153034        | Sulawesi        | Female     | Wallacea                      |
| AMNH             | M-153037        | Sulawesi        | Female     | Wallacea                      |
| AMNH             | M-223102        | Sulawesi        | Female     | Wallacea                      |
| AMNH             | M-223104        | Sulawesi        | Female     | Wallacea                      |
| AMNH             | M-223105        | Sulawesi        | Female     | Wallacea                      |
| AMNH             | M-223106        | Sulawesi        | Female     | Wallacea                      |
| AMNH             | M-223108        | Sulawesi        | Female     | Wallacea                      |
| AMNH             | M-223112        | Sulawesi        | Female     | Wallacea                      |
| AMNH             | M-223113        | Sulawesi        | Female     | Wallacea                      |
| AMNH             | M-223116        | Sulawesi        | Female     | Wallacea                      |
| AMNH             | M-223117        | Sulawesi        | Female     | Wallacea                      |
| AMNH             | M-223118        | Sulawesi        | Female     | Wallacea                      |
| AMNH             | M-223119        | Sulawesi        | Female     | Wallacea                      |
| AMNH             | M-223121        | Sulawesi        | Female     | Wallacea                      |
| AMNH             | M-223122        | Sulawesi        | Female     | Wallacea                      |
| AMNH             | M-223126        | Sulawesi        | Female     | Wallacea                      |
| AMNH             | M-223128        | Sulawesi        | Female     | Wallacea                      |
| AMNH             | M-223131        | Sulawesi        | Female     | Wallacea                      |
| AMNH             | M-223133        | Sulawesi        | Female     | Wallacea                      |
| AMNH             | M-223135        | Sulawesi        | Female     | Wallacea                      |
| AMNH             | M-223136        | Sulawesi        | Female     | Wallacea                      |
| AMNH             | M-223137        | Sulawesi        | Female     | Wallacea                      |
| AMNH             | M-223141        | Sulawesi        | Female     | Wallacea                      |

| <b>Institute</b> | <b>Specimen</b> | <b>Island</b>   | <b>Sex</b> | <b>Biogeographical region</b> |
|------------------|-----------------|-----------------|------------|-------------------------------|
| AMNH             | M-223144        | Sulawesi        | Female     | Wallacea                      |
| AMNH             | M-223146        | Sulawesi        | Female     | Wallacea                      |
| AMNH             | M-223367        | Sulawesi        | Female     | Wallacea                      |
| AMNH             | M-102672        | Sumatra         | Female     | Greater Sunda Islands         |
| AMNH             | M-102675        | Sumatra         | Female     | Greater Sunda Islands         |
| AMNH             | M-102676        | Sumatra         | Female     | Greater Sunda Islands         |
| AMNH             | M-102677        | Sumatra         | Female     | Greater Sunda Islands         |
| AMNH             | M-102678        | Sumatra         | Female     | Greater Sunda Islands         |
| AMNH             | M-102679        | Sumatra         | Female     | Greater Sunda Islands         |
| AMNH             | M-102682        | Sumatra         | Female     | Greater Sunda Islands         |
| AMNH             | M-102684        | Sumatra         | Female     | Greater Sunda Islands         |
| AMNH             | M-102690        | Sumatra         | Female     | Greater Sunda Islands         |
| AMNH             | M-102802        | Sumatra         | Female     | Greater Sunda Islands         |
| AMNH             | M-106360        | Sumatra         | Female     | Greater Sunda Islands         |
| AMNH             | M-106361        | Sumatra         | Female     | Greater Sunda Islands         |
| AMNH             | M-106362        | Sumatra         | Female     | Greater Sunda Islands         |
| AMNH             | M-106363        | Sumatra         | Female     | Greater Sunda Islands         |
| AMNH             | M-106364        | Sumatra         | Female     | Greater Sunda Islands         |
| AMNH             | M-106367        | Sumatra         | Female     | Greater Sunda Islands         |
| AMNH             | M-106368        | Sumatra         | Female     | Greater Sunda Islands         |
| AMNH             | M-106369        | Sumatra         | Female     | Greater Sunda Islands         |
| AMNH             | M-106370        | Sumatra         | Female     | Greater Sunda Islands         |
| AMNH             | M-106371        | Sumatra         | Female     | Greater Sunda Islands         |
| AMNH             | M-106659        | Sumatra         | Female     | Greater Sunda Islands         |
| AMNH             | M-106660        | Sumatra         | Female     | Greater Sunda Islands         |
| AMNH             | M-244145        | Sumatra         | Female     | Greater Sunda Islands         |
| AMNH             | M-109300        | Taliabu         | Female     | Wallacea                      |
| AMNH             | M-109302        | Taliabu         | Female     | Wallacea                      |
| AMNH             | M-109303        | Taliabu         | Female     | Wallacea                      |
| AMNH             | M-109308        | Taliabu         | Female     | Wallacea                      |
| AMNH             | M-109312        | Taliabu         | Female     | Wallacea                      |
| AMNH             | M-109313        | Taliabu         | Female     | Wallacea                      |
| AMNH             | M-109315        | Taliabu         | Female     | Wallacea                      |
| AMNH             | M-109316        | Taliabu         | Female     | Wallacea                      |
| AMNH             | M-109317        | Taliabu         | Female     | Wallacea                      |
| AMNH             | M-159687        | Woodlark Island | Female     | Melanesia                     |
| AMNH             | M-159688        | Woodlark Island | Female     | Melanesia                     |
| AMNH             | M-159690        | Woodlark Island | Female     | Melanesia                     |
| AMNH             | M-159691        | Woodlark Island | Female     | Melanesia                     |
| AMNH             | M-267704        | Ambon           | Male       | Wallacea                      |
| AMNH             | M-102159        | Bali            | Male       | Lesser Sunda Islands          |
| AMNH             | M-107979        | Bali            | Male       | Lesser Sunda Islands          |
| AMNH             | M-107980        | Bali            | Male       | Lesser Sunda Islands          |
| AMNH             | M-107983        | Bali            | Male       | Lesser Sunda Islands          |
| AMNH             | M-107984        | Bali            | Male       | Lesser Sunda Islands          |
| AMNH             | M-103516        | Borneo          | Male       | Greater Sunda Islands         |
| AMNH             | M-103518        | Borneo          | Male       | Greater Sunda Islands         |
| AMNH             | M-103519        | Borneo          | Male       | Greater Sunda Islands         |
| AMNH             | M-103520        | Borneo          | Male       | Greater Sunda Islands         |
| AMNH             | M-103521        | Borneo          | Male       | Greater Sunda Islands         |
| AMNH             | M-103522        | Borneo          | Male       | Greater Sunda Islands         |
| AMNH             | M-103527        | Borneo          | Male       | Greater Sunda Islands         |
| AMNH             | M-103829        | Borneo          | Male       | Greater Sunda Islands         |
| AMNH             | M-103830        | Borneo          | Male       | Greater Sunda Islands         |
| AMNH             | M-103833        | Borneo          | Male       | Greater Sunda Islands         |
| AMNH             | M-103841        | Borneo          | Male       | Greater Sunda Islands         |
| AMNH             | M-103928        | Borneo          | Male       | Greater Sunda Islands         |
| AMNH             | M-103929        | Borneo          | Male       | Greater Sunda Islands         |
| AMNH             | M-103931        | Borneo          | Male       | Greater Sunda Islands         |
| AMNH             | M-103932        | Borneo          | Male       | Greater Sunda Islands         |
| AMNH             | M-103933        | Borneo          | Male       | Greater Sunda Islands         |
| AMNH             | M-106127        | Borneo          | Male       | Greater Sunda Islands         |
| AMNH             | M-106129        | Borneo          | Male       | Greater Sunda Islands         |
| AMNH             | M-106194        | Borneo          | Male       | Greater Sunda Islands         |
| AMNH             | M-106198        | Borneo          | Male       | Greater Sunda Islands         |
| AMNH             | M-106201        | Borneo          | Male       | Greater Sunda Islands         |

| <b>Institute</b> | <b>Specimen</b> | <b>Island</b>     | <b>Sex</b> | <b>Biogeographical region</b> |
|------------------|-----------------|-------------------|------------|-------------------------------|
| AMNH             | M-106202        | Borneo            | Male       | Greater Sunda Islands         |
| AMNH             | M-106203        | Borneo            | Male       | Greater Sunda Islands         |
| AMNH             | M-106204        | Borneo            | Male       | Greater Sunda Islands         |
| AMNH             | M-106205        | Borneo            | Male       | Greater Sunda Islands         |
| AMNH             | M-106207        | Borneo            | Male       | Greater Sunda Islands         |
| AMNH             | M-107028        | Borneo            | Male       | Greater Sunda Islands         |
| AMNH             | M-107029        | Borneo            | Male       | Greater Sunda Islands         |
| AMNH             | M-107030        | Borneo            | Male       | Greater Sunda Islands         |
| AMNH             | M-107032        | Borneo            | Male       | Greater Sunda Islands         |
| AMNH             | M-107033        | Borneo            | Male       | Greater Sunda Islands         |
| AMNH             | M-107036        | Borneo            | Male       | Greater Sunda Islands         |
| AMNH             | M-107038        | Borneo            | Male       | Greater Sunda Islands         |
| AMNH             | M-107039        | Borneo            | Male       | Greater Sunda Islands         |
| AMNH             | M-107046        | Borneo            | Male       | Greater Sunda Islands         |
| AMNH             | M-163810        | Burma             | Male       | Mainland                      |
| AMNH             | M-163813        | Burma             | Male       | Mainland                      |
| AMNH             | M-163815        | Burma             | Male       | Mainland                      |
| AMNH             | M-163816        | Burma             | Male       | Mainland                      |
| AMNH             | M-163817        | Burma             | Male       | Mainland                      |
| AMNH             | M-31296         | Buru Island       | Male       | Wallacea                      |
| AMNH             | M-159737        | Fergusson Island  | Male       | Melanesia                     |
| AMNH             | M-159738        | Fergusson Island  | Male       | Melanesia                     |
| AMNH             | M-159739        | Fergusson Island  | Male       | Melanesia                     |
| AMNH             | M-159740        | Fergusson Island  | Male       | Melanesia                     |
| AMNH             | M-157925        | Goodenough Island | Male       | Melanesia                     |
| AMNH             | M-157926        | Goodenough Island | Male       | Melanesia                     |
| AMNH             | M-157927        | Goodenough Island | Male       | Melanesia                     |
| AMNH             | M-157928        | Goodenough Island | Male       | Melanesia                     |
| AMNH             | M-157929        | Goodenough Island | Male       | Melanesia                     |
| AMNH             | M-157930        | Goodenough Island | Male       | Melanesia                     |
| AMNH             | M-157931        | Goodenough Island | Male       | Melanesia                     |
| AMNH             | M-157932        | Goodenough Island | Male       | Melanesia                     |
| AMNH             | M-157933        | Goodenough Island | Male       | Melanesia                     |
| AMNH             | M-157934        | Goodenough Island | Male       | Melanesia                     |
| AMNH             | M-157942        | Goodenough Island | Male       | Melanesia                     |
| AMNH             | M-157943        | Goodenough Island | Male       | Melanesia                     |
| AMNH             | M-101295        | Halmahera         | Male       | Wallacea                      |
| AMNH             | M-101296        | Halmahera         | Male       | Wallacea                      |
| AMNH             | M-101298        | Halmahera         | Male       | Wallacea                      |
| AMNH             | M-101299        | Halmahera         | Male       | Wallacea                      |
| AMNH             | M-101300        | Halmahera         | Male       | Wallacea                      |
| AMNH             | M-101303        | Halmahera         | Male       | Wallacea                      |
| AMNH             | M-101304        | Halmahera         | Male       | Wallacea                      |
| AMNH             | M-267664        | Halmahera         | Male       | Wallacea                      |
| AMNH             | M-267665        | Halmahera         | Male       | Wallacea                      |
| AMNH             | M-267666        | Halmahera         | Male       | Wallacea                      |
| AMNH             | M-267667        | Halmahera         | Male       | Wallacea                      |
| AMNH             | M-267669        | Halmahera         | Male       | Wallacea                      |
| AMNH             | M-267670        | Halmahera         | Male       | Wallacea                      |
| AMNH             | M-267677        | Halmahera         | Male       | Wallacea                      |
| AMNH             | M-267679        | Halmahera         | Male       | Wallacea                      |
| AMNH             | M-267683        | Halmahera         | Male       | Wallacea                      |
| AMNH             | M-267686        | Halmahera         | Male       | Wallacea                      |
| AMNH             | M-267687        | Halmahera         | Male       | Wallacea                      |
| AMNH             | M-267688        | Halmahera         | Male       | Wallacea                      |
| AMNH             | M-267689        | Halmahera         | Male       | Wallacea                      |
| AMNH             | M-143880        | Hawaii            | Male       | Polynesia                     |
| AMNH             | M-143881        | Hawaii            | Male       | Polynesia                     |
| AMNH             | M-102006        | Java              | Male       | Greater Sunda Islands         |
| AMNH             | M-102007        | Java              | Male       | Greater Sunda Islands         |
| AMNH             | M-106644        | Java              | Male       | Greater Sunda Islands         |
| AMNH             | M-106868        | Java              | Male       | Greater Sunda Islands         |
| AMNH             | M-187190        | Luzon             | Male       | Wallacea                      |
| AMNH             | M-187191        | Luzon             | Male       | Wallacea                      |
| AMNH             | M-187192        | Luzon             | Male       | Wallacea                      |
| AMNH             | M-153296        | Malenge Island    | Male       | Wallacea                      |



| <b>Institute</b> | <b>Specimen</b> | <b>Island</b>      | <b>Sex</b> | <b>Biogeographical region</b> |
|------------------|-----------------|--------------------|------------|-------------------------------|
| AMNH             | M-153297        | Malenge Island     | Male       | Wallacea                      |
| AMNH             | M-153298        | Malenge Island     | Male       | Wallacea                      |
| AMNH             | M-153299        | Malenge Island     | Male       | Wallacea                      |
| AMNH             | M-153300        | Malenge Island     | Male       | Wallacea                      |
| AMNH             | M-153302        | Malenge Island     | Male       | Wallacea                      |
| AMNH             | M-153304        | Malenge Island     | Male       | Wallacea                      |
| AMNH             | M-153307        | Malenge Island     | Male       | Wallacea                      |
| AMNH             | M-153308        | Malenge Island     | Male       | Wallacea                      |
| AMNH             | M-153309        | Malenge Island     | Male       | Wallacea                      |
| AMNH             | M-153312        | Malenge Island     | Male       | Wallacea                      |
| AMNH             | M-153313        | Malenge Island     | Male       | Wallacea                      |
| AMNH             | M-153315        | Malenge Island     | Male       | Wallacea                      |
| AMNH             | M-153316        | Malenge Island     | Male       | Wallacea                      |
| AMNH             | M-32659         | Mindoro            | Male       | Wallacea                      |
| AMNH             | M-159732        | Misima Island      | Male       | Melanesia                     |
| AMNH             | M-159736        | Misima Island      | Male       | Melanesia                     |
| AMNH             | M-207545        | Negros             | Male       | Wallacea                      |
| AMNH             | M-207546        | Negros             | Male       | Wallacea                      |
| AMNH             | M-207548        | Negros             | Male       | Wallacea                      |
| AMNH             | M-207549        | Negros             | Male       | Wallacea                      |
| AMNH             | M-207550        | Negros             | Male       | Wallacea                      |
| AMNH             | M-194381        | New Britain Island | Male       | Melanesia                     |
| AMNH             | M-194382        | New Britain Island | Male       | Melanesia                     |
| AMNH             | M-194386        | New Britain Island | Male       | Melanesia                     |
| AMNH             | M-194387        | New Britain Island | Male       | Melanesia                     |
| AMNH             | M-194389        | New Britain Island | Male       | Melanesia                     |
| AMNH             | M-194391        | New Britain Island | Male       | Melanesia                     |
| AMNH             | M-222323        | New Britain Island | Male       | Melanesia                     |
| AMNH             | M-222324        | New Britain Island | Male       | Melanesia                     |
| AMNH             | M-222328        | New Britain Island | Male       | Melanesia                     |
| AMNH             | M-222329        | New Britain Island | Male       | Melanesia                     |
| AMNH             | M-222331        | New Britain Island | Male       | Melanesia                     |
| AMNH             | M-222334        | New Britain Island | Male       | Melanesia                     |
| AMNH             | M-222335        | New Britain Island | Male       | Melanesia                     |
| AMNH             | M-222336        | New Britain Island | Male       | Melanesia                     |
| AMNH             | M-222401        | New Britain Island | Male       | Melanesia                     |
| AMNH             | M-104161        | New Guinea         | Male       | Melanesia                     |
| AMNH             | M-104220        | New Guinea         | Male       | Melanesia                     |
| AMNH             | M-104236        | New Guinea         | Male       | Melanesia                     |
| AMNH             | M-104241        | New Guinea         | Male       | Melanesia                     |
| AMNH             | M-104250        | New Guinea         | Male       | Melanesia                     |
| AMNH             | M-104275        | New Guinea         | Male       | Melanesia                     |
| AMNH             | M-108201        | New Guinea         | Male       | Melanesia                     |
| AMNH             | M-108215        | New Guinea         | Male       | Melanesia                     |
| AMNH             | M-108247        | New Guinea         | Male       | Melanesia                     |
| AMNH             | M-108248        | New Guinea         | Male       | Melanesia                     |
| AMNH             | M-108249        | New Guinea         | Male       | Melanesia                     |
| AMNH             | M-108250        | New Guinea         | Male       | Melanesia                     |
| AMNH             | M-110085        | New Guinea         | Male       | Melanesia                     |
| AMNH             | M-110088        | New Guinea         | Male       | Melanesia                     |
| AMNH             | M-110093        | New Guinea         | Male       | Melanesia                     |
| AMNH             | M-110094        | New Guinea         | Male       | Melanesia                     |
| AMNH             | M-110095        | New Guinea         | Male       | Melanesia                     |
| AMNH             | M-110096        | New Guinea         | Male       | Melanesia                     |
| AMNH             | M-110097        | New Guinea         | Male       | Melanesia                     |
| AMNH             | M-110100        | New Guinea         | Male       | Melanesia                     |
| AMNH             | M-110101        | New Guinea         | Male       | Melanesia                     |
| AMNH             | M-110103        | New Guinea         | Male       | Melanesia                     |
| AMNH             | M-110107        | New Guinea         | Male       | Melanesia                     |
| AMNH             | M-110110        | New Guinea         | Male       | Melanesia                     |
| AMNH             | M-110111        | New Guinea         | Male       | Melanesia                     |
| AMNH             | M-110114        | New Guinea         | Male       | Melanesia                     |
| AMNH             | M-110121        | New Guinea         | Male       | Melanesia                     |
| AMNH             | M-110122        | New Guinea         | Male       | Melanesia                     |
| AMNH             | M-110125        | New Guinea         | Male       | Melanesia                     |
| AMNH             | M-110127        | New Guinea         | Male       | Melanesia                     |

| <b>Institute</b> | <b>Specimen</b> | <b>Island</b> | <b>Sex</b> | <b>Biogeographical region</b> |
|------------------|-----------------|---------------|------------|-------------------------------|
| AMNH             | M-110129        | New Guinea    | Male       | Melanesia                     |
| AMNH             | M-110130        | New Guinea    | Male       | Melanesia                     |
| AMNH             | M-143870        | New Guinea    | Male       | Melanesia                     |
| AMNH             | M-143872        | New Guinea    | Male       | Melanesia                     |
| AMNH             | M-150919        | New Guinea    | Male       | Melanesia                     |
| AMNH             | M-157858        | New Guinea    | Male       | Melanesia                     |
| AMNH             | M-157859        | New Guinea    | Male       | Melanesia                     |
| AMNH             | M-157860        | New Guinea    | Male       | Melanesia                     |
| AMNH             | M-157861        | New Guinea    | Male       | Melanesia                     |
| AMNH             | M-157862        | New Guinea    | Male       | Melanesia                     |
| AMNH             | M-157863        | New Guinea    | Male       | Melanesia                     |
| AMNH             | M-157864        | New Guinea    | Male       | Melanesia                     |
| AMNH             | M-157865        | New Guinea    | Male       | Melanesia                     |
| AMNH             | M-157866        | New Guinea    | Male       | Melanesia                     |
| AMNH             | M-157867        | New Guinea    | Male       | Melanesia                     |
| AMNH             | M-157868        | New Guinea    | Male       | Melanesia                     |
| AMNH             | M-157869        | New Guinea    | Male       | Melanesia                     |
| AMNH             | M-157870        | New Guinea    | Male       | Melanesia                     |
| AMNH             | M-157871        | New Guinea    | Male       | Melanesia                     |
| AMNH             | M-157872        | New Guinea    | Male       | Melanesia                     |
| AMNH             | M-157908        | New Guinea    | Male       | Melanesia                     |
| AMNH             | M-157909        | New Guinea    | Male       | Melanesia                     |
| AMNH             | M-157910        | New Guinea    | Male       | Melanesia                     |
| AMNH             | M-157911        | New Guinea    | Male       | Melanesia                     |
| AMNH             | M-157912        | New Guinea    | Male       | Melanesia                     |
| AMNH             | M-157913        | New Guinea    | Male       | Melanesia                     |
| AMNH             | M-157914        | New Guinea    | Male       | Melanesia                     |
| AMNH             | M-157916        | New Guinea    | Male       | Melanesia                     |
| AMNH             | M-191543        | New Guinea    | Male       | Melanesia                     |
| AMNH             | M-191544        | New Guinea    | Male       | Melanesia                     |
| AMNH             | M-191545        | New Guinea    | Male       | Melanesia                     |
| AMNH             | M-191546        | New Guinea    | Male       | Melanesia                     |
| AMNH             | M-191557        | New Guinea    | Male       | Melanesia                     |
| AMNH             | M-191558        | New Guinea    | Male       | Melanesia                     |
| AMNH             | M-191559        | New Guinea    | Male       | Melanesia                     |
| AMNH             | M-191560        | New Guinea    | Male       | Melanesia                     |
| AMNH             | M-191564        | New Guinea    | Male       | Melanesia                     |
| AMNH             | M-191569        | New Guinea    | Male       | Melanesia                     |
| AMNH             | M-191570        | New Guinea    | Male       | Melanesia                     |
| AMNH             | M-191571        | New Guinea    | Male       | Melanesia                     |
| AMNH             | M-191572        | New Guinea    | Male       | Melanesia                     |
| AMNH             | M-191578        | New Guinea    | Male       | Melanesia                     |
| AMNH             | M-191579        | New Guinea    | Male       | Melanesia                     |
| AMNH             | M-191580        | New Guinea    | Male       | Melanesia                     |
| AMNH             | M-191581        | New Guinea    | Male       | Melanesia                     |
| AMNH             | M-191582        | New Guinea    | Male       | Melanesia                     |
| AMNH             | M-191583        | New Guinea    | Male       | Melanesia                     |
| AMNH             | M-191584        | New Guinea    | Male       | Melanesia                     |
| AMNH             | M-191585        | New Guinea    | Male       | Melanesia                     |
| AMNH             | M-191586        | New Guinea    | Male       | Melanesia                     |
| AMNH             | M-191587        | New Guinea    | Male       | Melanesia                     |
| AMNH             | M-191588        | New Guinea    | Male       | Melanesia                     |
| AMNH             | M-191595        | New Guinea    | Male       | Melanesia                     |
| AMNH             | M-191596        | New Guinea    | Male       | Melanesia                     |
| AMNH             | M-191597        | New Guinea    | Male       | Melanesia                     |
| AMNH             | M-191599        | New Guinea    | Male       | Melanesia                     |
| AMNH             | M-191600        | New Guinea    | Male       | Melanesia                     |
| AMNH             | M-191601        | New Guinea    | Male       | Melanesia                     |
| AMNH             | M-191610        | New Guinea    | Male       | Melanesia                     |
| AMNH             | M-191611        | New Guinea    | Male       | Melanesia                     |
| AMNH             | M-191612        | New Guinea    | Male       | Melanesia                     |
| AMNH             | M-191613        | New Guinea    | Male       | Melanesia                     |
| AMNH             | M-191614        | New Guinea    | Male       | Melanesia                     |
| AMNH             | M-191619        | New Guinea    | Male       | Melanesia                     |
| AMNH             | M-191805        | New Guinea    | Male       | Melanesia                     |
| AMNH             | M-195041        | New Guinea    | Male       | Melanesia                     |

| <b>Institute</b> | <b>Specimen</b> | <b>Island</b> | <b>Sex</b> | <b>Biogeographical region</b> |
|------------------|-----------------|---------------|------------|-------------------------------|
| AMNH             | M-195042        | New Guinea    | Male       | Melanesia                     |
| AMNH             | M-195043        | New Guinea    | Male       | Melanesia                     |
| AMNH             | M-195045        | New Guinea    | Male       | Melanesia                     |
| AMNH             | M-195046        | New Guinea    | Male       | Melanesia                     |
| AMNH             | M-195052        | New Guinea    | Male       | Melanesia                     |
| AMNH             | M-195055        | New Guinea    | Male       | Melanesia                     |
| AMNH             | M-195056        | New Guinea    | Male       | Melanesia                     |
| AMNH             | M-195057        | New Guinea    | Male       | Melanesia                     |
| AMNH             | M-195058        | New Guinea    | Male       | Melanesia                     |
| AMNH             | M-195061        | New Guinea    | Male       | Melanesia                     |
| AMNH             | M-195063        | New Guinea    | Male       | Melanesia                     |
| AMNH             | M-195065        | New Guinea    | Male       | Melanesia                     |
| AMNH             | M-195066        | New Guinea    | Male       | Melanesia                     |
| AMNH             | M-195071        | New Guinea    | Male       | Melanesia                     |
| AMNH             | M-195073        | New Guinea    | Male       | Melanesia                     |
| AMNH             | M-195076        | New Guinea    | Male       | Melanesia                     |
| AMNH             | M-195077        | New Guinea    | Male       | Melanesia                     |
| AMNH             | M-195078        | New Guinea    | Male       | Melanesia                     |
| AMNH             | M-195080        | New Guinea    | Male       | Melanesia                     |
| AMNH             | M-195083        | New Guinea    | Male       | Melanesia                     |
| AMNH             | M-195084        | New Guinea    | Male       | Melanesia                     |
| AMNH             | M-195085        | New Guinea    | Male       | Melanesia                     |
| AMNH             | M-195086        | New Guinea    | Male       | Melanesia                     |
| AMNH             | M-195087        | New Guinea    | Male       | Melanesia                     |
| AMNH             | M-195090        | New Guinea    | Male       | Melanesia                     |
| AMNH             | M-198794        | New Guinea    | Male       | Melanesia                     |
| AMNH             | M-198795        | New Guinea    | Male       | Melanesia                     |
| AMNH             | M-198796        | New Guinea    | Male       | Melanesia                     |
| AMNH             | M-198797        | New Guinea    | Male       | Melanesia                     |
| AMNH             | M-198802        | New Guinea    | Male       | Melanesia                     |
| AMNH             | M-198803        | New Guinea    | Male       | Melanesia                     |
| AMNH             | M-198804        | New Guinea    | Male       | Melanesia                     |
| AMNH             | M-198805        | New Guinea    | Male       | Melanesia                     |
| AMNH             | M-198806        | New Guinea    | Male       | Melanesia                     |
| AMNH             | M-222286        | New Guinea    | Male       | Melanesia                     |
| AMNH             | M-222290        | New Guinea    | Male       | Melanesia                     |
| AMNH             | M-222293        | New Guinea    | Male       | Melanesia                     |
| AMNH             | M-222294        | New Guinea    | Male       | Melanesia                     |
| AMNH             | M-222295        | New Guinea    | Male       | Melanesia                     |
| AMNH             | M-222297        | New Guinea    | Male       | Melanesia                     |
| AMNH             | M-222299        | New Guinea    | Male       | Melanesia                     |
| AMNH             | M-222303        | New Guinea    | Male       | Melanesia                     |
| AMNH             | M-222304        | New Guinea    | Male       | Melanesia                     |
| AMNH             | M-222308        | New Guinea    | Male       | Melanesia                     |
| AMNH             | M-222309        | New Guinea    | Male       | Melanesia                     |
| AMNH             | M-222311        | New Guinea    | Male       | Melanesia                     |
| AMNH             | M-222312        | New Guinea    | Male       | Melanesia                     |
| AMNH             | M-222313        | New Guinea    | Male       | Melanesia                     |
| AMNH             | M-222314        | New Guinea    | Male       | Melanesia                     |
| AMNH             | M-222316        | New Guinea    | Male       | Melanesia                     |
| AMNH             | M-222318        | New Guinea    | Male       | Melanesia                     |
| AMNH             | M-222320        | New Guinea    | Male       | Melanesia                     |
| AMNH             | M-222339        | New Guinea    | Male       | Melanesia                     |
| AMNH             | M-222340        | New Guinea    | Male       | Melanesia                     |
| AMNH             | M-222341        | New Guinea    | Male       | Melanesia                     |
| AMNH             | M-222344        | New Guinea    | Male       | Melanesia                     |
| AMNH             | M-222346        | New Guinea    | Male       | Melanesia                     |
| AMNH             | M-222350        | New Guinea    | Male       | Melanesia                     |
| AMNH             | M-222353        | New Guinea    | Male       | Melanesia                     |
| AMNH             | M-222354        | New Guinea    | Male       | Melanesia                     |
| AMNH             | M-222356        | New Guinea    | Male       | Melanesia                     |
| AMNH             | M-222361        | New Guinea    | Male       | Melanesia                     |
| AMNH             | M-222363        | New Guinea    | Male       | Melanesia                     |
| AMNH             | M-222364        | New Guinea    | Male       | Melanesia                     |
| AMNH             | M-222365        | New Guinea    | Male       | Melanesia                     |
| AMNH             | M-222384        | New Guinea    | Male       | Melanesia                     |

| <b>Institute</b> | <b>Specimen</b> | <b>Island</b>   | <b>Sex</b> | <b>Biogeographical region</b> |
|------------------|-----------------|-----------------|------------|-------------------------------|
| AMNH             | M-222386        | New Guinea      | Male       | Melanesia                     |
| AMNH             | M-222388        | New Guinea      | Male       | Melanesia                     |
| AMNH             | M-222392        | New Guinea      | Male       | Melanesia                     |
| AMNH             | M-222394        | New Guinea      | Male       | Melanesia                     |
| AMNH             | M-222396        | New Guinea      | Male       | Melanesia                     |
| AMNH             | M-222404        | New Guinea      | Male       | Melanesia                     |
| AMNH             | M-159744        | Normanby Island | Male       | Melanesia                     |
| AMNH             | M-159745        | Normanby Island | Male       | Melanesia                     |
| AMNH             | M-159746        | Normanby Island | Male       | Melanesia                     |
| AMNH             | M-159747        | Normanby Island | Male       | Melanesia                     |
| AMNH             | M-159748        | Normanby Island | Male       | Melanesia                     |
| AMNH             | M-159749        | Normanby Island | Male       | Melanesia                     |
| AMNH             | M-159750        | Normanby Island | Male       | Melanesia                     |
| AMNH             | M-159751        | Normanby Island | Male       | Melanesia                     |
| AMNH             | M-159752        | Normanby Island | Male       | Melanesia                     |
| AMNH             | M-159753        | Normanby Island | Male       | Melanesia                     |
| AMNH             | M-159754        | Normanby Island | Male       | Melanesia                     |
| AMNH             | M-159755        | Normanby Island | Male       | Melanesia                     |
| AMNH             | M-159756        | Normanby Island | Male       | Melanesia                     |
| AMNH             | M-159757        | Normanby Island | Male       | Melanesia                     |
| AMNH             | M-207607        | Palawan         | Male       | Sunda                         |
| AMNH             | M-109176        | Peleng Island   | Male       | Wallacea                      |
| AMNH             | M-109177        | Peleng Island   | Male       | Wallacea                      |
| AMNH             | M-109178        | Peleng Island   | Male       | Wallacea                      |
| AMNH             | M-109180        | Peleng Island   | Male       | Wallacea                      |
| AMNH             | M-68742         | Rose Island     | Male       | Polynesia                     |
| AMNH             | M-159692        | Rossel Island   | Male       | Melanesia                     |
| AMNH             | M-159693        | Rossel Island   | Male       | Melanesia                     |
| AMNH             | M-159694        | Rossel Island   | Male       | Melanesia                     |
| AMNH             | M-159695        | Rossel Island   | Male       | Melanesia                     |
| AMNH             | M-159696        | Rossel Island   | Male       | Melanesia                     |
| AMNH             | M-159697        | Rossel Island   | Male       | Melanesia                     |
| AMNH             | M-159698        | Rossel Island   | Male       | Melanesia                     |
| AMNH             | M-159699        | Rossel Island   | Male       | Melanesia                     |
| AMNH             | M-159712        | Rossel Island   | Male       | Melanesia                     |
| AMNH             | M-159713        | Rossel Island   | Male       | Melanesia                     |
| AMNH             | M-159717        | Sudest Island   | Male       | Melanesia                     |
| AMNH             | M-159718        | Sudest Island   | Male       | Melanesia                     |
| AMNH             | M-159719        | Sudest Island   | Male       | Melanesia                     |
| AMNH             | M-159720        | Sudest Island   | Male       | Melanesia                     |
| AMNH             | M-159721        | Sudest Island   | Male       | Melanesia                     |
| AMNH             | M-159722        | Sudest Island   | Male       | Melanesia                     |
| AMNH             | M-159723        | Sudest Island   | Male       | Melanesia                     |
| AMNH             | M-159724        | Sudest Island   | Male       | Melanesia                     |
| AMNH             | M-159729        | Sudest Island   | Male       | Melanesia                     |
| AMNH             | M-103165        | Sulawesi        | Male       | Greater Sunda Islands         |
| AMNH             | M-100985        | Sulawesi        | Male       | Wallacea                      |
| AMNH             | M-100987        | Sulawesi        | Male       | Wallacea                      |
| AMNH             | M-100989        | Sulawesi        | Male       | Wallacea                      |
| AMNH             | M-100990        | Sulawesi        | Male       | Wallacea                      |
| AMNH             | M-100992        | Sulawesi        | Male       | Wallacea                      |
| AMNH             | M-101047        | Sulawesi        | Male       | Wallacea                      |
| AMNH             | M-101048        | Sulawesi        | Male       | Wallacea                      |
| AMNH             | M-101049        | Sulawesi        | Male       | Wallacea                      |
| AMNH             | M-101190        | Sulawesi        | Male       | Wallacea                      |
| AMNH             | M-101262        | Sulawesi        | Male       | Wallacea                      |
| AMNH             | M-101264        | Sulawesi        | Male       | Wallacea                      |
| AMNH             | M-101265        | Sulawesi        | Male       | Wallacea                      |
| AMNH             | M-101270        | Sulawesi        | Male       | Wallacea                      |
| AMNH             | M-153014        | Sulawesi        | Male       | Wallacea                      |
| AMNH             | M-153022        | Sulawesi        | Male       | Wallacea                      |
| AMNH             | M-153023        | Sulawesi        | Male       | Wallacea                      |
| AMNH             | M-153024        | Sulawesi        | Male       | Wallacea                      |
| AMNH             | M-153025        | Sulawesi        | Male       | Wallacea                      |
| AMNH             | M-153026        | Sulawesi        | Male       | Wallacea                      |
| AMNH             | M-153028        | Sulawesi        | Male       | Wallacea                      |

| <b>Institute</b> | <b>Specimen</b> | <b>Island</b>   | <b>Sex</b> | <b>Biogeographical region</b> |
|------------------|-----------------|-----------------|------------|-------------------------------|
| AMNH             | M-153031        | Sulawesi        | Male       | Wallacea                      |
| AMNH             | M-153035        | Sulawesi        | Male       | Wallacea                      |
| AMNH             | M-153036        | Sulawesi        | Male       | Wallacea                      |
| AMNH             | M-223101        | Sulawesi        | Male       | Wallacea                      |
| AMNH             | M-223103        | Sulawesi        | Male       | Wallacea                      |
| AMNH             | M-223107        | Sulawesi        | Male       | Wallacea                      |
| AMNH             | M-223109        | Sulawesi        | Male       | Wallacea                      |
| AMNH             | M-223110        | Sulawesi        | Male       | Wallacea                      |
| AMNH             | M-223111        | Sulawesi        | Male       | Wallacea                      |
| AMNH             | M-223114        | Sulawesi        | Male       | Wallacea                      |
| AMNH             | M-223115        | Sulawesi        | Male       | Wallacea                      |
| AMNH             | M-223120        | Sulawesi        | Male       | Wallacea                      |
| AMNH             | M-223123        | Sulawesi        | Male       | Wallacea                      |
| AMNH             | M-223124        | Sulawesi        | Male       | Wallacea                      |
| AMNH             | M-223125        | Sulawesi        | Male       | Wallacea                      |
| AMNH             | M-223127        | Sulawesi        | Male       | Wallacea                      |
| AMNH             | M-223129        | Sulawesi        | Male       | Wallacea                      |
| AMNH             | M-223130        | Sulawesi        | Male       | Wallacea                      |
| AMNH             | M-223132        | Sulawesi        | Male       | Wallacea                      |
| AMNH             | M-223134        | Sulawesi        | Male       | Wallacea                      |
| AMNH             | M-223138        | Sulawesi        | Male       | Wallacea                      |
| AMNH             | M-223139        | Sulawesi        | Male       | Wallacea                      |
| AMNH             | M-223140        | Sulawesi        | Male       | Wallacea                      |
| AMNH             | M-223142        | Sulawesi        | Male       | Wallacea                      |
| AMNH             | M-223143        | Sulawesi        | Male       | Wallacea                      |
| AMNH             | M-223145        | Sulawesi        | Male       | Wallacea                      |
| AMNH             | M-223471        | Sulawesi        | Male       | Wallacea                      |
| AMNH             | M-224182        | Sulawesi        | Male       | Wallacea                      |
| AMNH             | M-267775        | Sulawesi        | Male       | Wallacea                      |
| AMNH             | M-267776        | Sulawesi        | Male       | Wallacea                      |
| AMNH             | M-102656        | Sumatra         | Male       | Greater Sunda Islands         |
| AMNH             | M-102669        | Sumatra         | Male       | Greater Sunda Islands         |
| AMNH             | M-102670        | Sumatra         | Male       | Greater Sunda Islands         |
| AMNH             | M-102671        | Sumatra         | Male       | Greater Sunda Islands         |
| AMNH             | M-102680        | Sumatra         | Male       | Greater Sunda Islands         |
| AMNH             | M-102683        | Sumatra         | Male       | Greater Sunda Islands         |
| AMNH             | M-102685        | Sumatra         | Male       | Greater Sunda Islands         |
| AMNH             | M-102687        | Sumatra         | Male       | Greater Sunda Islands         |
| AMNH             | M-102688        | Sumatra         | Male       | Greater Sunda Islands         |
| AMNH             | M-102689        | Sumatra         | Male       | Greater Sunda Islands         |
| AMNH             | M-102799        | Sumatra         | Male       | Greater Sunda Islands         |
| AMNH             | M-102800        | Sumatra         | Male       | Greater Sunda Islands         |
| AMNH             | M-102801        | Sumatra         | Male       | Greater Sunda Islands         |
| AMNH             | M-102803        | Sumatra         | Male       | Greater Sunda Islands         |
| AMNH             | M-102997        | Sumatra         | Male       | Greater Sunda Islands         |
| AMNH             | M-106365        | Sumatra         | Male       | Greater Sunda Islands         |
| AMNH             | M-106366        | Sumatra         | Male       | Greater Sunda Islands         |
| AMNH             | M-106372        | Sumatra         | Male       | Greater Sunda Islands         |
| AMNH             | M-109301        | Taliabu         | Male       | Wallacea                      |
| AMNH             | M-109304        | Taliabu         | Male       | Wallacea                      |
| AMNH             | M-109305        | Taliabu         | Male       | Wallacea                      |
| AMNH             | M-109306        | Taliabu         | Male       | Wallacea                      |
| AMNH             | M-109307        | Taliabu         | Male       | Wallacea                      |
| AMNH             | M-109309        | Taliabu         | Male       | Wallacea                      |
| AMNH             | M-109310        | Taliabu         | Male       | Wallacea                      |
| AMNH             | M-109311        | Taliabu         | Male       | Wallacea                      |
| AMNH             | M-109314        | Taliabu         | Male       | Wallacea                      |
| AMNH             | M-68744         | Tau Island      | Male       | Polynesia                     |
| AMNH             | M-240756        | Vietnam         | Male       | Mainland                      |
| AMNH             | M-159684        | Woodlark Island | Male       | Melanesia                     |
| AMNH             | M-159685        | Woodlark Island | Male       | Melanesia                     |
| AMNH             | M-159686        | Woodlark Island | Male       | Melanesia                     |
| AMNH             | M-103842        | Borneo          | Unknown    | Greater Sunda Islands         |
| AMNH             | M-103843        | Borneo          | Unknown    | Greater Sunda Islands         |
| AMNH             | M-101302        | Halmahera       | Unknown    | Wallacea                      |
| AMNH             | M-101305        | Halmahera       | Unknown    | Wallacea                      |

| <b>Institute</b> | <b>Specimen</b> | <b>Island</b>      | <b>Sex</b> | <b>Biogeographical region</b> |
|------------------|-----------------|--------------------|------------|-------------------------------|
| AMNH             | M-242148        | Luzon              | Unknown    | Wallacea                      |
| AMNH             | M-242182        | Mindanao           | Unknown    | Wallacea                      |
| AMNH             | M-222337        | New Britain Island | Unknown    | Melanesia                     |
| AMNH             | M-108182        | New Guinea         | Unknown    | Melanesia                     |
| AMNH             | M-191608        | New Guinea         | Unknown    | Melanesia                     |
| AMNH             | M-191609        | New Guinea         | Unknown    | Melanesia                     |
| AMNH             | M-222302        | New Guinea         | Unknown    | Melanesia                     |
| AMNH             | M-222306        | New Guinea         | Unknown    | Melanesia                     |
| AMNH             | M-222367        | New Guinea         | Unknown    | Melanesia                     |
| AMNH             | M-222368        | New Guinea         | Unknown    | Melanesia                     |
| AMNH             | M-222369        | New Guinea         | Unknown    | Melanesia                     |
| AMNH             | M-222370        | New Guinea         | Unknown    | Melanesia                     |
| AMNH             | M-222371        | New Guinea         | Unknown    | Melanesia                     |
| AMNH             | M-222372        | New Guinea         | Unknown    | Melanesia                     |
| AMNH             | M-222373        | New Guinea         | Unknown    | Melanesia                     |
| AMNH             | M-222374        | New Guinea         | Unknown    | Melanesia                     |
| AMNH             | M-222375        | New Guinea         | Unknown    | Melanesia                     |
| AMNH             | M-222376        | New Guinea         | Unknown    | Melanesia                     |
| AMNH             | M-222377        | New Guinea         | Unknown    | Melanesia                     |
| AMNH             | M-222378        | New Guinea         | Unknown    | Melanesia                     |
| AMNH             | M-222379        | New Guinea         | Unknown    | Melanesia                     |
| AMNH             | M-222380        | New Guinea         | Unknown    | Melanesia                     |
| AMNH             | M-222381        | New Guinea         | Unknown    | Melanesia                     |
| AMNH             | M-222383        | New Guinea         | Unknown    | Melanesia                     |
| AMNH             | M-222385        | New Guinea         | Unknown    | Melanesia                     |
| AMNH             | M-222387        | New Guinea         | Unknown    | Melanesia                     |
| AMNH             | M-222389        | New Guinea         | Unknown    | Melanesia                     |
| AMNH             | M-222391        | New Guinea         | Unknown    | Melanesia                     |
| AMNH             | M-222393        | New Guinea         | Unknown    | Melanesia                     |
| AMNH             | M-222395        | New Guinea         | Unknown    | Melanesia                     |
| AMNH             | M-222397        | New Guinea         | Unknown    | Melanesia                     |
| AMNH             | M-222398        | New Guinea         | Unknown    | Melanesia                     |
| AMNH             | M-222399        | New Guinea         | Unknown    | Melanesia                     |
| AMNH             | M-242207        | Palawan            | Unknown    | Sunda                         |
| AMNH             | M-242186        | Polillo Island     | Unknown    | Wallacea                      |
| AMNH             | M-109299        | Taliabu            | Unknown    | Wallacea                      |

| <b>Institute</b> | <b>Specimen</b> | <b>Island</b> | <b>Sex</b> | <b>Biogeographical region</b> |
|------------------|-----------------|---------------|------------|-------------------------------|
| USNM             | 292713          | Borneo        | Female     | Greater Sunda Islands         |
| USNM             | 292714          | Borneo        | Female     | Greater Sunda Islands         |
| USNM             | 292715          | Borneo        | Female     | Greater Sunda Islands         |
| USNM             | 292716          | Borneo        | Female     | Greater Sunda Islands         |
| USNM             | 292717          | Borneo        | Female     | Greater Sunda Islands         |
| USNM             | 292718          | Borneo        | Female     | Greater Sunda Islands         |
| USNM             | 292721          | Borneo        | Female     | Greater Sunda Islands         |
| USNM             | 292722          | Borneo        | Female     | Greater Sunda Islands         |
| USNM             | 292725          | Borneo        | Female     | Greater Sunda Islands         |
| USNM             | 292726          | Borneo        | Female     | Greater Sunda Islands         |
| USNM             | 292727          | Borneo        | Female     | Greater Sunda Islands         |
| USNM             | 292731          | Borneo        | Female     | Greater Sunda Islands         |
| USNM             | 292732          | Borneo        | Female     | Greater Sunda Islands         |
| USNM             | 301042          | Borneo        | Female     | Greater Sunda Islands         |
| USNM             | 317243          | Borneo        | Female     | Greater Sunda Islands         |
| USNM             | 197327          | Borneo        | Female     | Greater Sunda Islands         |
| USNM             | 197328          | Borneo        | Female     | Greater Sunda Islands         |
| USNM             | 197333          | Borneo        | Female     | Greater Sunda Islands         |
| USNM             | 197334          | Borneo        | Female     | Greater Sunda Islands         |
| USNM             | 197335          | Borneo        | Female     | Greater Sunda Islands         |
| USNM             | 197336          | Borneo        | Female     | Greater Sunda Islands         |
| USNM             | 197338          | Borneo        | Female     | Greater Sunda Islands         |
| USNM             | 197340          | Borneo        | Female     | Greater Sunda Islands         |
| USNM             | 197341          | Borneo        | Female     | Greater Sunda Islands         |
| USNM             | 142253          | Borneo        | Female     | Greater Sunda Islands         |
| USNM             | 142254          | Borneo        | Female     | Greater Sunda Islands         |
| USNM             | 142257          | Borneo        | Female     | Greater Sunda Islands         |
| USNM             | 145556          | Borneo        | Female     | Greater Sunda Islands         |
| USNM             | 145557          | Borneo        | Female     | Greater Sunda Islands         |
| USNM             | 145559          | Borneo        | Female     | Greater Sunda Islands         |
| USNM             | 145561          | Borneo        | Female     | Greater Sunda Islands         |
| USNM             | 153720          | Borneo        | Female     | Greater Sunda Islands         |
| USNM             | 198799          | Borneo        | Female     | Greater Sunda Islands         |
| USNM             | 197355          | Borneo        | Female     | Greater Sunda Islands         |
| USNM             | 489012          | Borneo        | Female     | Greater Sunda Islands         |
| USNM             | 489013          | Borneo        | Female     | Greater Sunda Islands         |
| USNM             | 521879          | Borneo        | Female     | Greater Sunda Islands         |
| USNM             | 521880          | Borneo        | Female     | Greater Sunda Islands         |
| USNM             | 521882          | Borneo        | Female     | Greater Sunda Islands         |
| USNM             | 521883          | Borneo        | Female     | Greater Sunda Islands         |
| USNM             | 521884          | Borneo        | Female     | Greater Sunda Islands         |
| USNM             | 301043          | Borneo        | Male       | Greater Sunda Islands         |
| USNM             | 521878          | Borneo        | Male       | Greater Sunda Islands         |
| USNM             | 292719          | Borneo        | Male       | Greater Sunda Islands         |
| USNM             | 292720          | Borneo        | Male       | Greater Sunda Islands         |
| USNM             | 292724          | Borneo        | Male       | Greater Sunda Islands         |
| USNM             | 292728          | Borneo        | Male       | Greater Sunda Islands         |
| USNM             | 292729          | Borneo        | Male       | Greater Sunda Islands         |
| USNM             | 292730          | Borneo        | Male       | Greater Sunda Islands         |
| USNM             | 301040          | Borneo        | Male       | Greater Sunda Islands         |
| USNM             | 301041          | Borneo        | Male       | Greater Sunda Islands         |
| USNM             | 301044          | Borneo        | Male       | Greater Sunda Islands         |
| USNM             | 317242          | Borneo        | Male       | Greater Sunda Islands         |
| USNM             | 317245          | Borneo        | Male       | Greater Sunda Islands         |
| USNM             | 197325          | Borneo        | Male       | Greater Sunda Islands         |
| USNM             | 197326          | Borneo        | Male       | Greater Sunda Islands         |
| USNM             | 197329          | Borneo        | Male       | Greater Sunda Islands         |
| USNM             | 197330          | Borneo        | Male       | Greater Sunda Islands         |
| USNM             | 197332          | Borneo        | Male       | Greater Sunda Islands         |
| USNM             | 197337          | Borneo        | Male       | Greater Sunda Islands         |
| USNM             | 197339          | Borneo        | Male       | Greater Sunda Islands         |
| USNM             | 197342          | Borneo        | Male       | Greater Sunda Islands         |
| USNM             | 197343          | Borneo        | Male       | Greater Sunda Islands         |
| USNM             | 197344          | Borneo        | Male       | Greater Sunda Islands         |
| USNM             | 197345          | Borneo        | Male       | Greater Sunda Islands         |
| USNM             | 197346          | Borneo        | Male       | Greater Sunda Islands         |

| <b>Institute</b> | <b>Specimen</b> | <b>Island</b> | <b>Sex</b> | <b>Biogeographical region</b> |
|------------------|-----------------|---------------|------------|-------------------------------|
| USNM             | 197347          | Borneo        | Male       | Greater Sunda Islands         |
| USNM             | 142249          | Borneo        | Male       | Greater Sunda Islands         |
| USNM             | 145558          | Borneo        | Male       | Greater Sunda Islands         |
| USNM             | 145562          | Borneo        | Male       | Greater Sunda Islands         |
| USNM             | 145564          | Borneo        | Male       | Greater Sunda Islands         |
| USNM             | 197348          | Borneo        | Male       | Greater Sunda Islands         |
| USNM             | 197349          | Borneo        | Male       | Greater Sunda Islands         |
| USNM             | 196765          | Borneo        | Male       | Greater Sunda Islands         |
| USNM             | 196766          | Borneo        | Male       | Greater Sunda Islands         |
| USNM             | 521881          | Borneo        | Male       | Greater Sunda Islands         |
| USNM             | 197331          | Borneo        | Male       | Greater Sunda Islands         |
| USNM             | 317244          | Borneo        | Unknown    | Greater Sunda Islands         |
| USNM             | 155710          | Java          | Female     | Greater Sunda Islands         |
| USNM             | 481583          | Java          | Female     | Greater Sunda Islands         |
| USNM             | 359656          | Java          | Female     | Greater Sunda Islands         |
| USNM             | 359657          | Java          | Female     | Greater Sunda Islands         |
| USNM             | 359658          | Java          | Female     | Greater Sunda Islands         |
| USNM             | 359665          | Java          | Female     | Greater Sunda Islands         |
| USNM             | 481534          | Java          | Female     | Greater Sunda Islands         |
| USNM             | 481540          | Java          | Female     | Greater Sunda Islands         |
| USNM             | 481542          | Java          | Female     | Greater Sunda Islands         |
| USNM             | 481544          | Java          | Female     | Greater Sunda Islands         |
| USNM             | 481548          | Java          | Female     | Greater Sunda Islands         |
| USNM             | 481549          | Java          | Female     | Greater Sunda Islands         |
| USNM             | 481551          | Java          | Female     | Greater Sunda Islands         |
| USNM             | 481559          | Java          | Female     | Greater Sunda Islands         |
| USNM             | 481562          | Java          | Female     | Greater Sunda Islands         |
| USNM             | 481563          | Java          | Female     | Greater Sunda Islands         |
| USNM             | 481569          | Java          | Female     | Greater Sunda Islands         |
| USNM             | 481570          | Java          | Female     | Greater Sunda Islands         |
| USNM             | 481571          | Java          | Female     | Greater Sunda Islands         |
| USNM             | 481572          | Java          | Female     | Greater Sunda Islands         |
| USNM             | 481576          | Java          | Female     | Greater Sunda Islands         |
| USNM             | 481578          | Java          | Female     | Greater Sunda Islands         |
| USNM             | 481581          | Java          | Female     | Greater Sunda Islands         |
| USNM             | 481585          | Java          | Female     | Greater Sunda Islands         |
| USNM             | 481586          | Java          | Female     | Greater Sunda Islands         |
| USNM             | 481590          | Java          | Female     | Greater Sunda Islands         |
| USNM             | 481595          | Java          | Female     | Greater Sunda Islands         |
| USNM             | 496965          | Java          | Female     | Greater Sunda Islands         |
| USNM             | 521872          | Java          | Female     | Greater Sunda Islands         |
| USNM             | 521874          | Java          | Female     | Greater Sunda Islands         |
| USNM             | 521892          | Java          | Female     | Greater Sunda Islands         |
| USNM             | 521894          | Java          | Female     | Greater Sunda Islands         |
| USNM             | 521896          | Java          | Female     | Greater Sunda Islands         |
| USNM             | 521898          | Java          | Female     | Greater Sunda Islands         |
| USNM             | 521899          | Java          | Female     | Greater Sunda Islands         |
| USNM             | 521900          | Java          | Female     | Greater Sunda Islands         |
| USNM             | 521903          | Java          | Female     | Greater Sunda Islands         |
| USNM             | 521911          | Java          | Female     | Greater Sunda Islands         |
| USNM             | 521913          | Java          | Female     | Greater Sunda Islands         |
| USNM             | 521914          | Java          | Female     | Greater Sunda Islands         |
| USNM             | 535941          | Java          | Female     | Greater Sunda Islands         |
| USNM             | 535944          | Java          | Female     | Greater Sunda Islands         |
| USNM             | 535946          | Java          | Female     | Greater Sunda Islands         |
| USNM             | 535947          | Java          | Female     | Greater Sunda Islands         |
| USNM             | 535948          | Java          | Female     | Greater Sunda Islands         |
| USNM             | 535949          | Java          | Female     | Greater Sunda Islands         |
| USNM             | 535951          | Java          | Female     | Greater Sunda Islands         |
| USNM             | 535959          | Java          | Female     | Greater Sunda Islands         |
| USNM             | 481566          | Java          | Female     | Greater Sunda Islands         |
| USNM             | 481567          | Java          | Female     | Greater Sunda Islands         |
| USNM             | 155711          | Java          | Female     | Greater Sunda Islands         |
| USNM             | 481587          | Java          | Male       | Greater Sunda Islands         |
| USNM             | 155709          | Java          | Male       | Greater Sunda Islands         |
| USNM             | 155713          | Java          | Male       | Greater Sunda Islands         |





| <b>Institute</b> | <b>Specimen</b> | <b>Island</b> | <b>Sex</b> | <b>Biogeographical region</b> |
|------------------|-----------------|---------------|------------|-------------------------------|
| USNM             | 535955          | Java          | Male       | Greater Sunda Islands         |
| USNM             | 535957          | Java          | Male       | Greater Sunda Islands         |
| USNM             | 535958          | Java          | Male       | Greater Sunda Islands         |
| USNM             | 535960          | Java          | Male       | Greater Sunda Islands         |
| USNM             | 481558          | Java          | Male       | Greater Sunda Islands         |
| USNM             | 481565          | Java          | Male       | Greater Sunda Islands         |
| USNM             | 481568          | Java          | Male       | Greater Sunda Islands         |
| USNM             | 481573          | Java          | Male       | Greater Sunda Islands         |
| USNM             | 481574          | Java          | Male       | Greater Sunda Islands         |
| USNM             | 481582          | Java          | Male       | Greater Sunda Islands         |
| USNM             | 481584          | Java          | Male       | Greater Sunda Islands         |
| USNM             | 481592          | Java          | Male       | Greater Sunda Islands         |
| USNM             | 521886          | Java          | Male       | Greater Sunda Islands         |
| USNM             | 521901          | Java          | Male       | Greater Sunda Islands         |
| USNM             | 535956          | Java          | Male       | Greater Sunda Islands         |
| USNM             | 141196          | Sumatra       | Female     | Greater Sunda Islands         |
| USNM             | 141198          | Sumatra       | Female     | Greater Sunda Islands         |
| USNM             | 141199          | Sumatra       | Female     | Greater Sunda Islands         |
| USNM             | 141200          | Sumatra       | Female     | Greater Sunda Islands         |
| USNM             | 142126          | Sumatra       | Female     | Greater Sunda Islands         |
| USNM             | 142127          | Sumatra       | Female     | Greater Sunda Islands         |
| USNM             | 143249          | Sumatra       | Female     | Greater Sunda Islands         |
| USNM             | 143251          | Sumatra       | Female     | Greater Sunda Islands         |
| USNM             | 114188          | Sumatra       | Female     | Greater Sunda Islands         |
| USNM             | 114189          | Sumatra       | Female     | Greater Sunda Islands         |
| USNM             | 114195          | Sumatra       | Female     | Greater Sunda Islands         |
| USNM             | 114197          | Sumatra       | Female     | Greater Sunda Islands         |
| USNM             | 114199          | Sumatra       | Female     | Greater Sunda Islands         |
| USNM             | 124888          | Sumatra       | Female     | Greater Sunda Islands         |
| USNM             | 141066          | Sumatra       | Male       | Greater Sunda Islands         |
| USNM             | 141068          | Sumatra       | Male       | Greater Sunda Islands         |
| USNM             | 144233          | Sumatra       | Male       | Greater Sunda Islands         |
| USNM             | 141197          | Sumatra       | Male       | Greater Sunda Islands         |
| USNM             | 114181          | Sumatra       | Male       | Greater Sunda Islands         |
| USNM             | 114182          | Sumatra       | Male       | Greater Sunda Islands         |
| USNM             | 114183          | Sumatra       | Male       | Greater Sunda Islands         |
| USNM             | 114185          | Sumatra       | Male       | Greater Sunda Islands         |
| USNM             | 114186          | Sumatra       | Male       | Greater Sunda Islands         |
| USNM             | 114187          | Sumatra       | Male       | Greater Sunda Islands         |
| USNM             | 114190          | Sumatra       | Male       | Greater Sunda Islands         |
| USNM             | 114191          | Sumatra       | Male       | Greater Sunda Islands         |
| USNM             | 114192          | Sumatra       | Male       | Greater Sunda Islands         |
| USNM             | 114193          | Sumatra       | Male       | Greater Sunda Islands         |
| USNM             | 114194          | Sumatra       | Male       | Greater Sunda Islands         |
| USNM             | 114196          | Sumatra       | Male       | Greater Sunda Islands         |
| USNM             | 114198          | Sumatra       | Male       | Greater Sunda Islands         |
| USNM             | 114200          | Sumatra       | Male       | Greater Sunda Islands         |
| USNM             | 121506          | Sumatra       | Male       | Greater Sunda Islands         |
| USNM             | 121507          | Sumatra       | Male       | Greater Sunda Islands         |
| USNM             | 114184          | Sumatra       | Male       | Greater Sunda Islands         |
| USNM             | 521904          | Sumatra       | Male       | Greater Sunda Islands         |
| USNM             | 521905          | Sumatra       | Male       | Greater Sunda Islands         |
| USNM             | 521906          | Sumatra       | Male       | Greater Sunda Islands         |
| USNM             | 521907          | Sumatra       | Male       | Greater Sunda Islands         |
| USNM             | 530281          | Bangladesh    | Female     | Mainland                      |
| USNM             | 530282          | Bangladesh    | Female     | Mainland                      |
| USNM             | 240536          | Laos          | Female     | Mainland                      |
| USNM             | 240541          | Laos          | Female     | Mainland                      |
| USNM             | 240542          | Laos          | Female     | Mainland                      |
| USNM             | 355472          | Laos          | Male       | Mainland                      |
| USNM             | 240540          | Laos          | Male       | Mainland                      |
| USNM             | 143295          | Malaysia      | Female     | Mainland                      |
| USNM             | 355370          | Malaysia      | Female     | Mainland                      |
| USNM             | 112443          | Malaysia      | Female     | Mainland                      |
| USNM             | 290237          | Malaysia      | Female     | Mainland                      |
| USNM             | 152190          | Malaysia      | Female     | Mainland                      |

| <b>Institute</b> | <b>Specimen</b> | <b>Island</b> | <b>Sex</b> | <b>Biogeographical region</b> |
|------------------|-----------------|---------------|------------|-------------------------------|
| USNM             | 291293          | Malaysia      | Female     | Mainland                      |
| USNM             | 101764          | Malaysia      | Male       | Mainland                      |
| USNM             | 152189          | Malaysia      | Male       | Mainland                      |
| USNM             | 283696          | Malaysia      | Male       | Mainland                      |
| USNM             | 291294          | Malaysia      | Male       | Mainland                      |
| USNM             | 355369          | Malaysia      | Male       | Mainland                      |
| USNM             | 277426          | Myanmar       | Female     | Mainland                      |
| USNM             | 277812          | Myanmar       | Female     | Mainland                      |
| USNM             | 277813          | Myanmar       | Female     | Mainland                      |
| USNM             | 277814          | Myanmar       | Female     | Mainland                      |
| USNM             | 277815          | Myanmar       | Female     | Mainland                      |
| USNM             | 277818          | Myanmar       | Female     | Mainland                      |
| USNM             | 277821          | Myanmar       | Female     | Mainland                      |
| USNM             | 277822          | Myanmar       | Female     | Mainland                      |
| USNM             | 277823          | Myanmar       | Female     | Mainland                      |
| USNM             | 277824          | Myanmar       | Female     | Mainland                      |
| USNM             | 277825          | Myanmar       | Female     | Mainland                      |
| USNM             | 277827          | Myanmar       | Female     | Mainland                      |
| USNM             | 277866          | Myanmar       | Female     | Mainland                      |
| USNM             | 279287          | Myanmar       | Female     | Mainland                      |
| USNM             | 279288          | Myanmar       | Female     | Mainland                      |
| USNM             | 279289          | Myanmar       | Female     | Mainland                      |
| USNM             | 279292          | Myanmar       | Female     | Mainland                      |
| USNM             | 296805          | Myanmar       | Female     | Mainland                      |
| USNM             | 583804          | Myanmar       | Female     | Mainland                      |
| USNM             | 277425          | Myanmar       | Male       | Mainland                      |
| USNM             | 277811          | Myanmar       | Male       | Mainland                      |
| USNM             | 277816          | Myanmar       | Male       | Mainland                      |
| USNM             | 277817          | Myanmar       | Male       | Mainland                      |
| USNM             | 277819          | Myanmar       | Male       | Mainland                      |
| USNM             | 277820          | Myanmar       | Male       | Mainland                      |
| USNM             | 277826          | Myanmar       | Male       | Mainland                      |
| USNM             | 277828          | Myanmar       | Male       | Mainland                      |
| USNM             | 277829          | Myanmar       | Male       | Mainland                      |
| USNM             | 277865          | Myanmar       | Male       | Mainland                      |
| USNM             | 277867          | Myanmar       | Male       | Mainland                      |
| USNM             | 279290          | Myanmar       | Male       | Mainland                      |
| USNM             | 279291          | Myanmar       | Male       | Mainland                      |
| USNM             | 111981          | Myanmar       | Male       | Mainland                      |
| USNM             | 583803          | Myanmar       | Male       | Mainland                      |
| USNM             | 583805          | Myanmar       | Male       | Mainland                      |
| USNM             | 294352          | Thailand      | Female     | Mainland                      |
| USNM             | 294354          | Thailand      | Female     | Mainland                      |
| USNM             | 294394          | Thailand      | Female     | Mainland                      |
| USNM             | 355154          | Thailand      | Female     | Mainland                      |
| USNM             | 355161          | Thailand      | Female     | Mainland                      |
| USNM             | 355175          | Thailand      | Female     | Mainland                      |
| USNM             | 355176          | Thailand      | Female     | Mainland                      |
| USNM             | 221539          | Thailand      | Female     | Mainland                      |
| USNM             | 221540          | Thailand      | Female     | Mainland                      |
| USNM             | 241082          | Thailand      | Female     | Mainland                      |
| USNM             | 241460          | Thailand      | Female     | Mainland                      |
| USNM             | 253595          | Thailand      | Female     | Mainland                      |
| USNM             | 253596          | Thailand      | Female     | Mainland                      |
| USNM             | 253597          | Thailand      | Female     | Mainland                      |
| USNM             | 257821          | Thailand      | Female     | Mainland                      |
| USNM             | 260637          | Thailand      | Female     | Mainland                      |
| USNM             | 294346          | Thailand      | Female     | Mainland                      |
| USNM             | 294347          | Thailand      | Female     | Mainland                      |
| USNM             | 294348          | Thailand      | Female     | Mainland                      |
| USNM             | 294350          | Thailand      | Female     | Mainland                      |
| USNM             | 294389          | Thailand      | Female     | Mainland                      |
| USNM             | 294390          | Thailand      | Female     | Mainland                      |
| USNM             | 294391          | Thailand      | Female     | Mainland                      |
| USNM             | 294392          | Thailand      | Female     | Mainland                      |
| USNM             | 294396          | Thailand      | Female     | Mainland                      |

| <b>Institute</b> | <b>Specimen</b> | <b>Island</b> | <b>Sex</b> | <b>Biogeographical region</b> |
|------------------|-----------------|---------------|------------|-------------------------------|
| USNM             | 294399          | Thailand      | Female     | Mainland                      |
| USNM             | 294400          | Thailand      | Female     | Mainland                      |
| USNM             | 294402          | Thailand      | Female     | Mainland                      |
| USNM             | 294915          | Thailand      | Female     | Mainland                      |
| USNM             | 294916          | Thailand      | Female     | Mainland                      |
| USNM             | 294919          | Thailand      | Female     | Mainland                      |
| USNM             | 294920          | Thailand      | Female     | Mainland                      |
| USNM             | 294925          | Thailand      | Female     | Mainland                      |
| USNM             | 294928          | Thailand      | Female     | Mainland                      |
| USNM             | 294929          | Thailand      | Female     | Mainland                      |
| USNM             | 296554          | Thailand      | Female     | Mainland                      |
| USNM             | 296555          | Thailand      | Female     | Mainland                      |
| USNM             | 296557          | Thailand      | Female     | Mainland                      |
| USNM             | 297110          | Thailand      | Female     | Mainland                      |
| USNM             | 297111          | Thailand      | Female     | Mainland                      |
| USNM             | 297115          | Thailand      | Female     | Mainland                      |
| USNM             | 297116          | Thailand      | Female     | Mainland                      |
| USNM             | 297117          | Thailand      | Female     | Mainland                      |
| USNM             | 297118          | Thailand      | Female     | Mainland                      |
| USNM             | 297119          | Thailand      | Female     | Mainland                      |
| USNM             | 297121          | Thailand      | Female     | Mainland                      |
| USNM             | 297122          | Thailand      | Female     | Mainland                      |
| USNM             | 297124          | Thailand      | Female     | Mainland                      |
| USNM             | 297126          | Thailand      | Female     | Mainland                      |
| USNM             | 297127          | Thailand      | Female     | Mainland                      |
| USNM             | 297130          | Thailand      | Female     | Mainland                      |
| USNM             | 297131          | Thailand      | Female     | Mainland                      |
| USNM             | 297135          | Thailand      | Female     | Mainland                      |
| USNM             | 308201          | Thailand      | Female     | Mainland                      |
| USNM             | 308203          | Thailand      | Female     | Mainland                      |
| USNM             | 355142          | Thailand      | Female     | Mainland                      |
| USNM             | 355146          | Thailand      | Female     | Mainland                      |
| USNM             | 355151          | Thailand      | Female     | Mainland                      |
| USNM             | 355152          | Thailand      | Female     | Mainland                      |
| USNM             | 355153          | Thailand      | Female     | Mainland                      |
| USNM             | 355155          | Thailand      | Female     | Mainland                      |
| USNM             | 355156          | Thailand      | Female     | Mainland                      |
| USNM             | 355157          | Thailand      | Female     | Mainland                      |
| USNM             | 355159          | Thailand      | Female     | Mainland                      |
| USNM             | 355160          | Thailand      | Female     | Mainland                      |
| USNM             | 355162          | Thailand      | Female     | Mainland                      |
| USNM             | 355167          | Thailand      | Female     | Mainland                      |
| USNM             | 355171          | Thailand      | Female     | Mainland                      |
| USNM             | 355172          | Thailand      | Female     | Mainland                      |
| USNM             | 355177          | Thailand      | Female     | Mainland                      |
| USNM             | 355178          | Thailand      | Female     | Mainland                      |
| USNM             | 355179          | Thailand      | Female     | Mainland                      |
| USNM             | 355180          | Thailand      | Female     | Mainland                      |
| USNM             | 533417          | Thailand      | Female     | Mainland                      |
| USNM             | 533418          | Thailand      | Female     | Mainland                      |
| USNM             | 533419          | Thailand      | Female     | Mainland                      |
| USNM             | 533420          | Thailand      | Female     | Mainland                      |
| USNM             | 533422          | Thailand      | Female     | Mainland                      |
| USNM             | 533426          | Thailand      | Female     | Mainland                      |
| USNM             | 533428          | Thailand      | Female     | Mainland                      |
| USNM             | 533430          | Thailand      | Female     | Mainland                      |
| USNM             | 533431          | Thailand      | Female     | Mainland                      |
| USNM             | 533432          | Thailand      | Female     | Mainland                      |
| USNM             | 294398          | Thailand      | Male       | Mainland                      |
| USNM             | 355145          | Thailand      | Male       | Mainland                      |
| USNM             | 355170          | Thailand      | Male       | Mainland                      |
| USNM             | 201543          | Thailand      | Male       | Mainland                      |
| USNM             | 201544          | Thailand      | Male       | Mainland                      |
| USNM             | 221538          | Thailand      | Male       | Mainland                      |
| USNM             | 221541          | Thailand      | Male       | Mainland                      |
| USNM             | 241456          | Thailand      | Male       | Mainland                      |

| <b>Institute</b> | <b>Specimen</b> | <b>Island</b> | <b>Sex</b> | <b>Biogeographical region</b> |
|------------------|-----------------|---------------|------------|-------------------------------|
| USNM             | 241458          | Thailand      | Male       | Mainland                      |
| USNM             | 251708          | Thailand      | Male       | Mainland                      |
| USNM             | 252264          | Thailand      | Male       | Mainland                      |
| USNM             | 267250          | Thailand      | Male       | Mainland                      |
| USNM             | 294349          | Thailand      | Male       | Mainland                      |
| USNM             | 294353          | Thailand      | Male       | Mainland                      |
| USNM             | 294401          | Thailand      | Male       | Mainland                      |
| USNM             | 294917          | Thailand      | Male       | Mainland                      |
| USNM             | 294918          | Thailand      | Male       | Mainland                      |
| USNM             | 294921          | Thailand      | Male       | Mainland                      |
| USNM             | 294922          | Thailand      | Male       | Mainland                      |
| USNM             | 294923          | Thailand      | Male       | Mainland                      |
| USNM             | 294924          | Thailand      | Male       | Mainland                      |
| USNM             | 294926          | Thailand      | Male       | Mainland                      |
| USNM             | 294927          | Thailand      | Male       | Mainland                      |
| USNM             | 296551          | Thailand      | Male       | Mainland                      |
| USNM             | 296552          | Thailand      | Male       | Mainland                      |
| USNM             | 296553          | Thailand      | Male       | Mainland                      |
| USNM             | 297112          | Thailand      | Male       | Mainland                      |
| USNM             | 297113          | Thailand      | Male       | Mainland                      |
| USNM             | 297114          | Thailand      | Male       | Mainland                      |
| USNM             | 297120          | Thailand      | Male       | Mainland                      |
| USNM             | 297123          | Thailand      | Male       | Mainland                      |
| USNM             | 297125          | Thailand      | Male       | Mainland                      |
| USNM             | 297128          | Thailand      | Male       | Mainland                      |
| USNM             | 297129          | Thailand      | Male       | Mainland                      |
| USNM             | 297132          | Thailand      | Male       | Mainland                      |
| USNM             | 297134          | Thailand      | Male       | Mainland                      |
| USNM             | 308200          | Thailand      | Male       | Mainland                      |
| USNM             | 308202          | Thailand      | Male       | Mainland                      |
| USNM             | 355141          | Thailand      | Male       | Mainland                      |
| USNM             | 355143          | Thailand      | Male       | Mainland                      |
| USNM             | 355144          | Thailand      | Male       | Mainland                      |
| USNM             | 355147          | Thailand      | Male       | Mainland                      |
| USNM             | 355148          | Thailand      | Male       | Mainland                      |
| USNM             | 355149          | Thailand      | Male       | Mainland                      |
| USNM             | 355150          | Thailand      | Male       | Mainland                      |
| USNM             | 355158          | Thailand      | Male       | Mainland                      |
| USNM             | 355164          | Thailand      | Male       | Mainland                      |
| USNM             | 355165          | Thailand      | Male       | Mainland                      |
| USNM             | 355166          | Thailand      | Male       | Mainland                      |
| USNM             | 355168          | Thailand      | Male       | Mainland                      |
| USNM             | 355169          | Thailand      | Male       | Mainland                      |
| USNM             | 355173          | Thailand      | Male       | Mainland                      |
| USNM             | 355174          | Thailand      | Male       | Mainland                      |
| USNM             | 533416          | Thailand      | Male       | Mainland                      |
| USNM             | 533421          | Thailand      | Male       | Mainland                      |
| USNM             | 533425          | Thailand      | Male       | Mainland                      |
| USNM             | 533427          | Thailand      | Male       | Mainland                      |
| USNM             | 533429          | Thailand      | Male       | Mainland                      |
| USNM             | 533433          | Thailand      | Male       | Mainland                      |
| USNM             | 533434          | Thailand      | Male       | Mainland                      |
| USNM             | 355163          | Thailand      | Unknown    | Mainland                      |
| USNM             | 294351          | Thailand      | Unknown    | Mainland                      |
| USNM             | 296556          | Thailand      | Unknown    | Mainland                      |
| USNM             | 308199          | Thailand      | Unknown    | Mainland                      |
| USNM             | 356493          | Vietnam       | Female     | Mainland                      |
| USNM             | 356496          | Vietnam       | Female     | Mainland                      |
| USNM             | 357601          | Vietnam       | Female     | Mainland                      |
| USNM             | 321152          | Vietnam       | Female     | Mainland                      |
| USNM             | 321153          | Vietnam       | Female     | Mainland                      |
| USNM             | 321154          | Vietnam       | Female     | Mainland                      |
| USNM             | 321155          | Vietnam       | Female     | Mainland                      |
| USNM             | 321156          | Vietnam       | Female     | Mainland                      |
| USNM             | 321161          | Vietnam       | Female     | Mainland                      |
| USNM             | 321165          | Vietnam       | Female     | Mainland                      |

| <b>Institute</b> | <b>Specimen</b> | <b>Island</b> | <b>Sex</b> | <b>Biogeographical region</b> |
|------------------|-----------------|---------------|------------|-------------------------------|
| USNM             | 321166          | Vietnam       | Female     | Mainland                      |
| USNM             | 321167          | Vietnam       | Female     | Mainland                      |
| USNM             | 321168          | Vietnam       | Female     | Mainland                      |
| USNM             | 321170          | Vietnam       | Female     | Mainland                      |
| USNM             | 321173          | Vietnam       | Female     | Mainland                      |
| USNM             | 321174          | Vietnam       | Female     | Mainland                      |
| USNM             | 321175          | Vietnam       | Female     | Mainland                      |
| USNM             | 321176          | Vietnam       | Female     | Mainland                      |
| USNM             | 321177          | Vietnam       | Female     | Mainland                      |
| USNM             | 321178          | Vietnam       | Female     | Mainland                      |
| USNM             | 321179          | Vietnam       | Female     | Mainland                      |
| USNM             | 321181          | Vietnam       | Female     | Mainland                      |
| USNM             | 321183          | Vietnam       | Female     | Mainland                      |
| USNM             | 321188          | Vietnam       | Female     | Mainland                      |
| USNM             | 321193          | Vietnam       | Female     | Mainland                      |
| USNM             | 321196          | Vietnam       | Female     | Mainland                      |
| USNM             | 321197          | Vietnam       | Female     | Mainland                      |
| USNM             | 321198          | Vietnam       | Female     | Mainland                      |
| USNM             | 321200          | Vietnam       | Female     | Mainland                      |
| USNM             | 321202          | Vietnam       | Female     | Mainland                      |
| USNM             | 321207          | Vietnam       | Female     | Mainland                      |
| USNM             | 321208          | Vietnam       | Female     | Mainland                      |
| USNM             | 321210          | Vietnam       | Female     | Mainland                      |
| USNM             | 321211          | Vietnam       | Female     | Mainland                      |
| USNM             | 332462          | Vietnam       | Female     | Mainland                      |
| USNM             | 332463          | Vietnam       | Female     | Mainland                      |
| USNM             | 332464          | Vietnam       | Female     | Mainland                      |
| USNM             | 334786          | Vietnam       | Female     | Mainland                      |
| USNM             | 334787          | Vietnam       | Female     | Mainland                      |
| USNM             | 334789          | Vietnam       | Female     | Mainland                      |
| USNM             | 356482          | Vietnam       | Female     | Mainland                      |
| USNM             | 356485          | Vietnam       | Female     | Mainland                      |
| USNM             | 356486          | Vietnam       | Female     | Mainland                      |
| USNM             | 356490          | Vietnam       | Female     | Mainland                      |
| USNM             | 356801          | Vietnam       | Female     | Mainland                      |
| USNM             | 356803          | Vietnam       | Female     | Mainland                      |
| USNM             | 356804          | Vietnam       | Female     | Mainland                      |
| USNM             | 356805          | Vietnam       | Female     | Mainland                      |
| USNM             | 356913          | Vietnam       | Female     | Mainland                      |
| USNM             | 356914          | Vietnam       | Female     | Mainland                      |
| USNM             | 356917          | Vietnam       | Female     | Mainland                      |
| USNM             | 356918          | Vietnam       | Female     | Mainland                      |
| USNM             | 356920          | Vietnam       | Female     | Mainland                      |
| USNM             | 357552          | Vietnam       | Female     | Mainland                      |
| USNM             | 357021          | Vietnam       | Female     | Mainland                      |
| USNM             | 357022          | Vietnam       | Female     | Mainland                      |
| USNM             | 357024          | Vietnam       | Female     | Mainland                      |
| USNM             | 357025          | Vietnam       | Female     | Mainland                      |
| USNM             | 357027          | Vietnam       | Female     | Mainland                      |
| USNM             | 357030          | Vietnam       | Female     | Mainland                      |
| USNM             | 357033          | Vietnam       | Female     | Mainland                      |
| USNM             | 357034          | Vietnam       | Female     | Mainland                      |
| USNM             | 357035          | Vietnam       | Female     | Mainland                      |
| USNM             | 357036          | Vietnam       | Female     | Mainland                      |
| USNM             | 357038          | Vietnam       | Female     | Mainland                      |
| USNM             | 357039          | Vietnam       | Female     | Mainland                      |
| USNM             | 357040          | Vietnam       | Female     | Mainland                      |
| USNM             | 357041          | Vietnam       | Female     | Mainland                      |
| USNM             | 357046          | Vietnam       | Female     | Mainland                      |
| USNM             | 357048          | Vietnam       | Female     | Mainland                      |
| USNM             | 357049          | Vietnam       | Female     | Mainland                      |
| USNM             | 357050          | Vietnam       | Female     | Mainland                      |
| USNM             | 357054          | Vietnam       | Female     | Mainland                      |
| USNM             | 357056          | Vietnam       | Female     | Mainland                      |
| USNM             | 357060          | Vietnam       | Female     | Mainland                      |
| USNM             | 357089          | Vietnam       | Female     | Mainland                      |

| <b>Institute</b> | <b>Specimen</b> | <b>Island</b> | <b>Sex</b> | <b>Biogeographical region</b> |
|------------------|-----------------|---------------|------------|-------------------------------|
| USNM             | 357591          | Vietnam       | Female     | Mainland                      |
| USNM             | 357780          | Vietnam       | Female     | Mainland                      |
| USNM             | 357782          | Vietnam       | Female     | Mainland                      |
| USNM             | 357783          | Vietnam       | Female     | Mainland                      |
| USNM             | 357786          | Vietnam       | Female     | Mainland                      |
| USNM             | 358877          | Vietnam       | Female     | Mainland                      |
| USNM             | 357292          | Vietnam       | Female     | Mainland                      |
| USNM             | 357047          | Vietnam       | Female     | Mainland                      |
| USNM             | 356494          | Vietnam       | Male       | Mainland                      |
| USNM             | 321157          | Vietnam       | Male       | Mainland                      |
| USNM             | 321158          | Vietnam       | Male       | Mainland                      |
| USNM             | 321159          | Vietnam       | Male       | Mainland                      |
| USNM             | 321160          | Vietnam       | Male       | Mainland                      |
| USNM             | 321162          | Vietnam       | Male       | Mainland                      |
| USNM             | 321163          | Vietnam       | Male       | Mainland                      |
| USNM             | 321164          | Vietnam       | Male       | Mainland                      |
| USNM             | 321169          | Vietnam       | Male       | Mainland                      |
| USNM             | 321171          | Vietnam       | Male       | Mainland                      |
| USNM             | 321172          | Vietnam       | Male       | Mainland                      |
| USNM             | 334783          | Vietnam       | Male       | Mainland                      |
| USNM             | 321185          | Vietnam       | Male       | Mainland                      |
| USNM             | 321186          | Vietnam       | Male       | Mainland                      |
| USNM             | 321187          | Vietnam       | Male       | Mainland                      |
| USNM             | 321189          | Vietnam       | Male       | Mainland                      |
| USNM             | 321190          | Vietnam       | Male       | Mainland                      |
| USNM             | 321192          | Vietnam       | Male       | Mainland                      |
| USNM             | 321199          | Vietnam       | Male       | Mainland                      |
| USNM             | 321201          | Vietnam       | Male       | Mainland                      |
| USNM             | 321203          | Vietnam       | Male       | Mainland                      |
| USNM             | 321209          | Vietnam       | Male       | Mainland                      |
| USNM             | 334784          | Vietnam       | Male       | Mainland                      |
| USNM             | 334785          | Vietnam       | Male       | Mainland                      |
| USNM             | 334788          | Vietnam       | Male       | Mainland                      |
| USNM             | 334790          | Vietnam       | Male       | Mainland                      |
| USNM             | 334791          | Vietnam       | Male       | Mainland                      |
| USNM             | 356488          | Vietnam       | Male       | Mainland                      |
| USNM             | 356489          | Vietnam       | Male       | Mainland                      |
| USNM             | 356492          | Vietnam       | Male       | Mainland                      |
| USNM             | 356802          | Vietnam       | Male       | Mainland                      |
| USNM             | 357551          | Vietnam       | Male       | Mainland                      |
| USNM             | 357019          | Vietnam       | Male       | Mainland                      |
| USNM             | 357031          | Vietnam       | Male       | Mainland                      |
| USNM             | 357032          | Vietnam       | Male       | Mainland                      |
| USNM             | 357037          | Vietnam       | Male       | Mainland                      |
| USNM             | 357043          | Vietnam       | Male       | Mainland                      |
| USNM             | 357045          | Vietnam       | Male       | Mainland                      |
| USNM             | 357051          | Vietnam       | Male       | Mainland                      |
| USNM             | 357052          | Vietnam       | Male       | Mainland                      |
| USNM             | 357053          | Vietnam       | Male       | Mainland                      |
| USNM             | 357055          | Vietnam       | Male       | Mainland                      |
| USNM             | 357057          | Vietnam       | Male       | Mainland                      |
| USNM             | 355473          | Vietnam       | Male       | Mainland                      |
| USNM             | 357788          | Vietnam       | Male       | Mainland                      |
| USNM             | 357550          | Vietnam       | Male       | Mainland                      |
| USNM             | 321182          | Vietnam       | Male       | Mainland                      |
| USNM             | 321191          | Vietnam       | Male       | Mainland                      |
| USNM             | 321194          | Vietnam       | Male       | Mainland                      |
| USNM             | 321195          | Vietnam       | Male       | Mainland                      |
| USNM             | 321204          | Vietnam       | Male       | Mainland                      |
| USNM             | 321205          | Vietnam       | Male       | Mainland                      |
| USNM             | 321206          | Vietnam       | Male       | Mainland                      |
| USNM             | 356481          | Vietnam       | Male       | Mainland                      |
| USNM             | 356483          | Vietnam       | Male       | Mainland                      |
| USNM             | 356487          | Vietnam       | Male       | Mainland                      |
| USNM             | 356491          | Vietnam       | Male       | Mainland                      |
| USNM             | 356495          | Vietnam       | Male       | Mainland                      |

| <b>Institute</b> | <b>Specimen</b> | <b>Island</b> | <b>Sex</b> | <b>Biogeographical region</b> |
|------------------|-----------------|---------------|------------|-------------------------------|
| USNM             | 356800          | Vietnam       | Male       | Mainland                      |
| USNM             | 356919          | Vietnam       | Male       | Mainland                      |
| USNM             | 357020          | Vietnam       | Male       | Mainland                      |
| USNM             | 357023          | Vietnam       | Male       | Mainland                      |
| USNM             | 357026          | Vietnam       | Male       | Mainland                      |
| USNM             | 357028          | Vietnam       | Male       | Mainland                      |
| USNM             | 357029          | Vietnam       | Male       | Mainland                      |
| USNM             | 357042          | Vietnam       | Male       | Mainland                      |
| USNM             | 357044          | Vietnam       | Male       | Mainland                      |
| USNM             | 357058          | Vietnam       | Male       | Mainland                      |
| USNM             | 357059          | Vietnam       | Male       | Mainland                      |
| USNM             | 357224          | Vietnam       | Male       | Mainland                      |
| USNM             | 357663          | Vietnam       | Male       | Mainland                      |
| USNM             | 357712          | Vietnam       | Male       | Mainland                      |
| USNM             | 357781          | Vietnam       | Male       | Mainland                      |
| USNM             | 357787          | Vietnam       | Male       | Mainland                      |
| USNM             | 321180          | Vietnam       | Male       | Mainland                      |
| USNM             | 356912          | Vietnam       | Male       | Mainland                      |
| USNM             | 321184          | Vietnam       | Unknown    | Mainland                      |
| USNM             | 277079          | Bougainville  | Female     | Melanesia                     |
| USNM             | 276883          | Bougainville  | Female     | Melanesia                     |
| USNM             | 276884          | Bougainville  | Female     | Melanesia                     |
| USNM             | 276885          | Bougainville  | Female     | Melanesia                     |
| USNM             | 276886          | Bougainville  | Female     | Melanesia                     |
| USNM             | 276887          | Bougainville  | Female     | Melanesia                     |
| USNM             | 276891          | Bougainville  | Female     | Melanesia                     |
| USNM             | 276892          | Bougainville  | Female     | Melanesia                     |
| USNM             | 276893          | Bougainville  | Female     | Melanesia                     |
| USNM             | 277074          | Bougainville  | Female     | Melanesia                     |
| USNM             | 277077          | Bougainville  | Female     | Melanesia                     |
| USNM             | 276897          | Bougainville  | Female     | Melanesia                     |
| USNM             | 276898          | Bougainville  | Female     | Melanesia                     |
| USNM             | 276902          | Bougainville  | Female     | Melanesia                     |
| USNM             | 276904          | Bougainville  | Female     | Melanesia                     |
| USNM             | 276906          | Bougainville  | Female     | Melanesia                     |
| USNM             | 276907          | Bougainville  | Female     | Melanesia                     |
| USNM             | 276837          | Bougainville  | Female     | Melanesia                     |
| USNM             | 276840          | Bougainville  | Female     | Melanesia                     |
| USNM             | 276841          | Bougainville  | Female     | Melanesia                     |
| USNM             | 276842          | Bougainville  | Female     | Melanesia                     |
| USNM             | 276844          | Bougainville  | Female     | Melanesia                     |
| USNM             | 276845          | Bougainville  | Female     | Melanesia                     |
| USNM             | 276847          | Bougainville  | Female     | Melanesia                     |
| USNM             | 276849          | Bougainville  | Female     | Melanesia                     |
| USNM             | 276852          | Bougainville  | Female     | Melanesia                     |
| USNM             | 276855          | Bougainville  | Female     | Melanesia                     |
| USNM             | 276859          | Bougainville  | Female     | Melanesia                     |
| USNM             | 276861          | Bougainville  | Female     | Melanesia                     |
| USNM             | 276863          | Bougainville  | Female     | Melanesia                     |
| USNM             | 276865          | Bougainville  | Female     | Melanesia                     |
| USNM             | 276866          | Bougainville  | Female     | Melanesia                     |
| USNM             | 276867          | Bougainville  | Female     | Melanesia                     |
| USNM             | 276870          | Bougainville  | Female     | Melanesia                     |
| USNM             | 276874          | Bougainville  | Female     | Melanesia                     |
| USNM             | 276875          | Bougainville  | Female     | Melanesia                     |
| USNM             | 276877          | Bougainville  | Female     | Melanesia                     |
| USNM             | 276880          | Bougainville  | Female     | Melanesia                     |
| USNM             | 277080          | Bougainville  | Male       | Melanesia                     |
| USNM             | 276860          | Bougainville  | Male       | Melanesia                     |
| USNM             | 276881          | Bougainville  | Male       | Melanesia                     |
| USNM             | 276882          | Bougainville  | Male       | Melanesia                     |
| USNM             | 276888          | Bougainville  | Male       | Melanesia                     |
| USNM             | 276889          | Bougainville  | Male       | Melanesia                     |
| USNM             | 276890          | Bougainville  | Male       | Melanesia                     |
| USNM             | 276894          | Bougainville  | Male       | Melanesia                     |
| USNM             | 276895          | Bougainville  | Male       | Melanesia                     |



| <b>Institute</b> | <b>Specimen</b> | <b>Island</b> | <b>Sex</b> | <b>Biogeographical region</b> |
|------------------|-----------------|---------------|------------|-------------------------------|
| USNM             | 276896          | Bougainville  | Male       | Melanesia                     |
| USNM             | 277071          | Bougainville  | Male       | Melanesia                     |
| USNM             | 277078          | Bougainville  | Male       | Melanesia                     |
| USNM             | 277083          | Bougainville  | Male       | Melanesia                     |
| USNM             | 276899          | Bougainville  | Male       | Melanesia                     |
| USNM             | 276900          | Bougainville  | Male       | Melanesia                     |
| USNM             | 276901          | Bougainville  | Male       | Melanesia                     |
| USNM             | 276903          | Bougainville  | Male       | Melanesia                     |
| USNM             | 276905          | Bougainville  | Male       | Melanesia                     |
| USNM             | 276824          | Bougainville  | Male       | Melanesia                     |
| USNM             | 276833          | Bougainville  | Male       | Melanesia                     |
| USNM             | 276834          | Bougainville  | Male       | Melanesia                     |
| USNM             | 276835          | Bougainville  | Male       | Melanesia                     |
| USNM             | 276836          | Bougainville  | Male       | Melanesia                     |
| USNM             | 276838          | Bougainville  | Male       | Melanesia                     |
| USNM             | 276839          | Bougainville  | Male       | Melanesia                     |
| USNM             | 276843          | Bougainville  | Male       | Melanesia                     |
| USNM             | 276846          | Bougainville  | Male       | Melanesia                     |
| USNM             | 276850          | Bougainville  | Male       | Melanesia                     |
| USNM             | 276851          | Bougainville  | Male       | Melanesia                     |
| USNM             | 276853          | Bougainville  | Male       | Melanesia                     |
| USNM             | 276854          | Bougainville  | Male       | Melanesia                     |
| USNM             | 276856          | Bougainville  | Male       | Melanesia                     |
| USNM             | 276857          | Bougainville  | Male       | Melanesia                     |
| USNM             | 276858          | Bougainville  | Male       | Melanesia                     |
| USNM             | 276862          | Bougainville  | Male       | Melanesia                     |
| USNM             | 276864          | Bougainville  | Male       | Melanesia                     |
| USNM             | 276868          | Bougainville  | Male       | Melanesia                     |
| USNM             | 276869          | Bougainville  | Male       | Melanesia                     |
| USNM             | 276871          | Bougainville  | Male       | Melanesia                     |
| USNM             | 276872          | Bougainville  | Male       | Melanesia                     |
| USNM             | 276873          | Bougainville  | Male       | Melanesia                     |
| USNM             | 276876          | Bougainville  | Male       | Melanesia                     |
| USNM             | 276878          | Bougainville  | Male       | Melanesia                     |
| USNM             | 276879          | Bougainville  | Male       | Melanesia                     |
| USNM             | 277081          | Bougainville  | Male       | Melanesia                     |
| USNM             | 277082          | Bougainville  | Male       | Melanesia                     |
| USNM             | 277084          | Bougainville  | Male       | Melanesia                     |
| USNM             | 276911          | Emirau        | Female     | Melanesia                     |
| USNM             | 277073          | Emirau        | Male       | Melanesia                     |
| USNM             | 276908          | Emirau        | Male       | Melanesia                     |
| USNM             | 276909          | Emirau        | Male       | Melanesia                     |
| USNM             | 276910          | Emirau        | Male       | Melanesia                     |
| USNM             | 260694          | Fiji          | Female     | Melanesia                     |
| USNM             | 260695          | Fiji          | Female     | Melanesia                     |
| USNM             | 260693          | Fiji          | Male       | Melanesia                     |
| USNM             | 3731            | Fiji          | Unknown    | Melanesia                     |
| USNM             | 276740          | Guadalcanal   | Female     | Melanesia                     |
| USNM             | 278077          | Guadalcanal   | Female     | Melanesia                     |
| USNM             | 278080          | Guadalcanal   | Female     | Melanesia                     |
| USNM             | 278082          | Guadalcanal   | Female     | Melanesia                     |
| USNM             | 278084          | Guadalcanal   | Female     | Melanesia                     |
| USNM             | 278086          | Guadalcanal   | Female     | Melanesia                     |
| USNM             | 278087          | Guadalcanal   | Female     | Melanesia                     |
| USNM             | 278088          | Guadalcanal   | Female     | Melanesia                     |
| USNM             | 278093          | Guadalcanal   | Female     | Melanesia                     |
| USNM             | 278096          | Guadalcanal   | Female     | Melanesia                     |
| USNM             | 278102          | Guadalcanal   | Female     | Melanesia                     |
| USNM             | 278104          | Guadalcanal   | Female     | Melanesia                     |
| USNM             | 278106          | Guadalcanal   | Female     | Melanesia                     |
| USNM             | 278110          | Guadalcanal   | Female     | Melanesia                     |
| USNM             | 278111          | Guadalcanal   | Female     | Melanesia                     |
| USNM             | 278112          | Guadalcanal   | Female     | Melanesia                     |
| USNM             | 278113          | Guadalcanal   | Female     | Melanesia                     |
| USNM             | 276741          | Guadalcanal   | Male       | Melanesia                     |
| USNM             | 278073          | Guadalcanal   | Male       | Melanesia                     |

| <b>Institute</b> | <b>Specimen</b> | <b>Island</b> | <b>Sex</b> | <b>Biogeographical region</b> |
|------------------|-----------------|---------------|------------|-------------------------------|
| USNM             | 278074          | Guadalcanal   | Male       | Melanesia                     |
| USNM             | 278075          | Guadalcanal   | Male       | Melanesia                     |
| USNM             | 278076          | Guadalcanal   | Male       | Melanesia                     |
| USNM             | 278078          | Guadalcanal   | Male       | Melanesia                     |
| USNM             | 278079          | Guadalcanal   | Male       | Melanesia                     |
| USNM             | 278081          | Guadalcanal   | Male       | Melanesia                     |
| USNM             | 278083          | Guadalcanal   | Male       | Melanesia                     |
| USNM             | 278085          | Guadalcanal   | Male       | Melanesia                     |
| USNM             | 278089          | Guadalcanal   | Male       | Melanesia                     |
| USNM             | 278090          | Guadalcanal   | Male       | Melanesia                     |
| USNM             | 278091          | Guadalcanal   | Male       | Melanesia                     |
| USNM             | 278092          | Guadalcanal   | Male       | Melanesia                     |
| USNM             | 278094          | Guadalcanal   | Male       | Melanesia                     |
| USNM             | 278095          | Guadalcanal   | Male       | Melanesia                     |
| USNM             | 278097          | Guadalcanal   | Male       | Melanesia                     |
| USNM             | 278098          | Guadalcanal   | Male       | Melanesia                     |
| USNM             | 278099          | Guadalcanal   | Male       | Melanesia                     |
| USNM             | 278100          | Guadalcanal   | Male       | Melanesia                     |
| USNM             | 278101          | Guadalcanal   | Male       | Melanesia                     |
| USNM             | 278103          | Guadalcanal   | Male       | Melanesia                     |
| USNM             | 278105          | Guadalcanal   | Male       | Melanesia                     |
| USNM             | 278107          | Guadalcanal   | Male       | Melanesia                     |
| USNM             | 278108          | Guadalcanal   | Male       | Melanesia                     |
| USNM             | 278109          | Guadalcanal   | Male       | Melanesia                     |
| USNM             | 278114          | Guadalcanal   | Male       | Melanesia                     |
| USNM             | 289914          | Guadalcanal   | Unknown    | Melanesia                     |
| USNM             | 289915          | Guadalcanal   | Unknown    | Melanesia                     |
| USNM             | 276750          | New Caledonia | Female     | Melanesia                     |
| USNM             | 276756          | New Caledonia | Female     | Melanesia                     |
| USNM             | 271510          | New Caledonia | Female     | Melanesia                     |
| USNM             | 271512          | New Caledonia | Female     | Melanesia                     |
| USNM             | 276744          | New Caledonia | Female     | Melanesia                     |
| USNM             | 276746          | New Caledonia | Female     | Melanesia                     |
| USNM             | 276748          | New Caledonia | Female     | Melanesia                     |
| USNM             | 276914          | New Caledonia | Female     | Melanesia                     |
| USNM             | 276915          | New Caledonia | Female     | Melanesia                     |
| USNM             | 276916          | New Caledonia | Female     | Melanesia                     |
| USNM             | 277069          | New Caledonia | Female     | Melanesia                     |
| USNM             | 271511          | New Caledonia | Female     | Melanesia                     |
| USNM             | 276762          | New Caledonia | Female     | Melanesia                     |
| USNM             | 276763          | New Caledonia | Female     | Melanesia                     |
| USNM             | 276764          | New Caledonia | Female     | Melanesia                     |
| USNM             | 276765          | New Caledonia | Female     | Melanesia                     |
| USNM             | 276766          | New Caledonia | Female     | Melanesia                     |
| USNM             | 276769          | New Caledonia | Female     | Melanesia                     |
| USNM             | 276771          | New Caledonia | Female     | Melanesia                     |
| USNM             | 276772          | New Caledonia | Female     | Melanesia                     |
| USNM             | 276773          | New Caledonia | Female     | Melanesia                     |
| USNM             | 276774          | New Caledonia | Female     | Melanesia                     |
| USNM             | 276785          | New Caledonia | Female     | Melanesia                     |
| USNM             | 276789          | New Caledonia | Female     | Melanesia                     |
| USNM             | 276751          | New Caledonia | Female     | Melanesia                     |
| USNM             | 276752          | New Caledonia | Female     | Melanesia                     |
| USNM             | 276753          | New Caledonia | Female     | Melanesia                     |
| USNM             | 276755          | New Caledonia | Female     | Melanesia                     |
| USNM             | 283354          | New Caledonia | Female     | Melanesia                     |
| USNM             | 283355          | New Caledonia | Female     | Melanesia                     |
| USNM             | 271500          | New Caledonia | Female     | Melanesia                     |
| USNM             | 271506          | New Caledonia | Female     | Melanesia                     |
| USNM             | 276760          | New Caledonia | Female     | Melanesia                     |
| USNM             | 271509          | New Caledonia | Male       | Melanesia                     |
| USNM             | 276745          | New Caledonia | Male       | Melanesia                     |
| USNM             | 276749          | New Caledonia | Male       | Melanesia                     |
| USNM             | 276912          | New Caledonia | Male       | Melanesia                     |
| USNM             | 276913          | New Caledonia | Male       | Melanesia                     |
| USNM             | 276757          | New Caledonia | Male       | Melanesia                     |

| <b>Institute</b> | <b>Specimen</b> | <b>Island</b> | <b>Sex</b> | <b>Biogeographical region</b> |
|------------------|-----------------|---------------|------------|-------------------------------|
| USNM             | 276759          | New Caledonia | Male       | Melanesia                     |
| USNM             | 276761          | New Caledonia | Male       | Melanesia                     |
| USNM             | 276767          | New Caledonia | Male       | Melanesia                     |
| USNM             | 276770          | New Caledonia | Male       | Melanesia                     |
| USNM             | 276778          | New Caledonia | Male       | Melanesia                     |
| USNM             | 276779          | New Caledonia | Male       | Melanesia                     |
| USNM             | 276786          | New Caledonia | Male       | Melanesia                     |
| USNM             | 276788          | New Caledonia | Male       | Melanesia                     |
| USNM             | 276790          | New Caledonia | Male       | Melanesia                     |
| USNM             | 276791          | New Caledonia | Male       | Melanesia                     |
| USNM             | 276792          | New Caledonia | Male       | Melanesia                     |
| USNM             | 276754          | New Caledonia | Male       | Melanesia                     |
| USNM             | 271507          | New Caledonia | Male       | Melanesia                     |
| USNM             | 271508          | New Caledonia | Male       | Melanesia                     |
| USNM             | 357421          | New Guinea    | Female     | Melanesia                     |
| USNM             | 357423          | New Guinea    | Female     | Melanesia                     |
| USNM             | 277326          | New Guinea    | Female     | Melanesia                     |
| USNM             | 277335          | New Guinea    | Female     | Melanesia                     |
| USNM             | 277337          | New Guinea    | Female     | Melanesia                     |
| USNM             | 277325          | New Guinea    | Female     | Melanesia                     |
| USNM             | 357420          | New Guinea    | Female     | Melanesia                     |
| USNM             | 277330          | New Guinea    | Female     | Melanesia                     |
| USNM             | 277439          | New Guinea    | Female     | Melanesia                     |
| USNM             | 277461          | New Guinea    | Female     | Melanesia                     |
| USNM             | 277462          | New Guinea    | Female     | Melanesia                     |
| USNM             | 277463          | New Guinea    | Female     | Melanesia                     |
| USNM             | 295098          | New Guinea    | Female     | Melanesia                     |
| USNM             | 295104          | New Guinea    | Female     | Melanesia                     |
| USNM             | 295111          | New Guinea    | Female     | Melanesia                     |
| USNM             | 283864          | New Guinea    | Female     | Melanesia                     |
| USNM             | 283867          | New Guinea    | Female     | Melanesia                     |
| USNM             | 277258          | New Guinea    | Female     | Melanesia                     |
| USNM             | 357422          | New Guinea    | Male       | Melanesia                     |
| USNM             | 357424          | New Guinea    | Male       | Melanesia                     |
| USNM             | 277327          | New Guinea    | Male       | Melanesia                     |
| USNM             | 277328          | New Guinea    | Male       | Melanesia                     |
| USNM             | 277329          | New Guinea    | Male       | Melanesia                     |
| USNM             | 277332          | New Guinea    | Male       | Melanesia                     |
| USNM             | 277334          | New Guinea    | Male       | Melanesia                     |
| USNM             | 277336          | New Guinea    | Male       | Melanesia                     |
| USNM             | 277338          | New Guinea    | Male       | Melanesia                     |
| USNM             | 295091          | New Guinea    | Male       | Melanesia                     |
| USNM             | 295092          | New Guinea    | Male       | Melanesia                     |
| USNM             | 277324          | New Guinea    | Male       | Melanesia                     |
| USNM             | 277331          | New Guinea    | Male       | Melanesia                     |
| USNM             | 277333          | New Guinea    | Male       | Melanesia                     |
| USNM             | 277440          | New Guinea    | Male       | Melanesia                     |
| USNM             | 277464          | New Guinea    | Male       | Melanesia                     |
| USNM             | 277465          | New Guinea    | Male       | Melanesia                     |
| USNM             | 283861          | New Guinea    | Male       | Melanesia                     |
| USNM             | 283862          | New Guinea    | Male       | Melanesia                     |
| USNM             | 295094          | New Guinea    | Male       | Melanesia                     |
| USNM             | 295095          | New Guinea    | Male       | Melanesia                     |
| USNM             | 295096          | New Guinea    | Male       | Melanesia                     |
| USNM             | 295100          | New Guinea    | Male       | Melanesia                     |
| USNM             | 295103          | New Guinea    | Male       | Melanesia                     |
| USNM             | 283863          | New Guinea    | Male       | Melanesia                     |
| USNM             | 283865          | New Guinea    | Male       | Melanesia                     |
| USNM             | 283866          | New Guinea    | Male       | Melanesia                     |
| USNM             | 283868          | New Guinea    | Male       | Melanesia                     |
| USNM             | 276646          | New Guinea    | Male       | Melanesia                     |
| USNM             | 276647          | New Guinea    | Male       | Melanesia                     |
| USNM             | 580043          | New Ireland   | Female     | Melanesia                     |
| USNM             | 580044          | New Ireland   | Female     | Melanesia                     |
| USNM             | 580039          | New Ireland   | Male       | Melanesia                     |
| USNM             | 580042          | New Ireland   | Male       | Melanesia                     |

| <b>Institute</b> | <b>Specimen</b> | <b>Island</b>     | <b>Sex</b> | <b>Biogeographical region</b> |
|------------------|-----------------|-------------------|------------|-------------------------------|
| USNM             | 278710          | Ontong Java       | Female     | Melanesia                     |
| USNM             | 278711          | Ontong Java       | Female     | Melanesia                     |
| USNM             | 278707          | Ontong Java       | Female     | Melanesia                     |
| USNM             | 278709          | Ontong Java       | Male       | Melanesia                     |
| USNM             | 278708          | Ontong Java       | Male       | Melanesia                     |
| USNM             | 277308          | Padaido Islands   | Male       | Melanesia                     |
| USNM             | 278713          | Ugi               | Male       | Melanesia                     |
| USNM             | 271518          | Vanuatu           | Female     | Melanesia                     |
| USNM             | 276919          | Vanuatu           | Female     | Melanesia                     |
| USNM             | 276921          | Vanuatu           | Female     | Melanesia                     |
| USNM             | 277930          | Vanuatu           | Female     | Melanesia                     |
| USNM             | 277931          | Vanuatu           | Female     | Melanesia                     |
| USNM             | 277932          | Vanuatu           | Female     | Melanesia                     |
| USNM             | 277943          | Vanuatu           | Female     | Melanesia                     |
| USNM             | 277950          | Vanuatu           | Female     | Melanesia                     |
| USNM             | 277951          | Vanuatu           | Female     | Melanesia                     |
| USNM             | 277953          | Vanuatu           | Female     | Melanesia                     |
| USNM             | 277954          | Vanuatu           | Female     | Melanesia                     |
| USNM             | 277955          | Vanuatu           | Female     | Melanesia                     |
| USNM             | 276922          | Vanuatu           | Female     | Melanesia                     |
| USNM             | 277924          | Vanuatu           | Female     | Melanesia                     |
| USNM             | 277926          | Vanuatu           | Female     | Melanesia                     |
| USNM             | 277927          | Vanuatu           | Female     | Melanesia                     |
| USNM             | 277928          | Vanuatu           | Female     | Melanesia                     |
| USNM             | 271513          | Vanuatu           | Female     | Melanesia                     |
| USNM             | 271514          | Vanuatu           | Female     | Melanesia                     |
| USNM             | 271517          | Vanuatu           | Female     | Melanesia                     |
| USNM             | 276925          | Vanuatu           | Female     | Melanesia                     |
| USNM             | 276917          | Vanuatu           | Male       | Melanesia                     |
| USNM             | 276918          | Vanuatu           | Male       | Melanesia                     |
| USNM             | 276920          | Vanuatu           | Male       | Melanesia                     |
| USNM             | 276832          | Vanuatu           | Male       | Melanesia                     |
| USNM             | 277929          | Vanuatu           | Male       | Melanesia                     |
| USNM             | 277933          | Vanuatu           | Male       | Melanesia                     |
| USNM             | 277934          | Vanuatu           | Male       | Melanesia                     |
| USNM             | 277941          | Vanuatu           | Male       | Melanesia                     |
| USNM             | 277942          | Vanuatu           | Male       | Melanesia                     |
| USNM             | 277944          | Vanuatu           | Male       | Melanesia                     |
| USNM             | 276923          | Vanuatu           | Male       | Melanesia                     |
| USNM             | 276924          | Vanuatu           | Male       | Melanesia                     |
| USNM             | 277020          | Vanuatu           | Male       | Melanesia                     |
| USNM             | 277070          | Vanuatu           | Male       | Melanesia                     |
| USNM             | 277925          | Vanuatu           | Male       | Melanesia                     |
| USNM             | 271515          | Vanuatu           | Male       | Melanesia                     |
| USNM             | 271516          | Vanuatu           | Male       | Melanesia                     |
| USNM             | 277949          | Vanuatu           | Male       | Melanesia                     |
| USNM             | 277952          | Vanuatu           | Male       | Melanesia                     |
| USNM             | 277019          | Vanuatu           | Male       | Melanesia                     |
| USNM             | 302971          | Ant Atoll         | Female     | Micronesia                    |
| USNM             | 291948          | Arno Atoll        | Female     | Micronesia                    |
| USNM             | 291949          | Arno Atoll        | Female     | Micronesia                    |
| USNM             | 291950          | Arno Atoll        | Female     | Micronesia                    |
| USNM             | 291951          | Arno Atoll        | Female     | Micronesia                    |
| USNM             | 291952          | Arno Atoll        | Male       | Micronesia                    |
| USNM             | 356301          | Babelthuap Island | Female     | Micronesia                    |
| USNM             | 356303          | Babelthuap Island | Female     | Micronesia                    |
| USNM             | 356304          | Babelthuap Island | Female     | Micronesia                    |
| USNM             | 356302          | Babelthuap Island | Male       | Micronesia                    |
| USNM             | 279480          | Belau             | Female     | Micronesia                    |
| USNM             | 279481          | Belau             | Female     | Micronesia                    |
| USNM             | 279482          | Belau             | Female     | Micronesia                    |
| USNM             | 279483          | Belau             | Female     | Micronesia                    |
| USNM             | 279484          | Belau             | Female     | Micronesia                    |
| USNM             | 308258          | Belau             | Male       | Micronesia                    |
| USNM             | 361455          | Bikar Atoll       | Female     | Micronesia                    |
| USNM             | 361457          | Bikar Atoll       | Female     | Micronesia                    |

| <b>Institute</b> | <b>Specimen</b> | <b>Island</b>    | <b>Sex</b> | <b>Biogeographical region</b> |
|------------------|-----------------|------------------|------------|-------------------------------|
| USNM             | 361466          | Bikar Atoll      | Female     | Micronesia                    |
| USNM             | 362189          | Bikar Atoll      | Female     | Micronesia                    |
| USNM             | 362190          | Bikar Atoll      | Female     | Micronesia                    |
| USNM             | 362191          | Bikar Atoll      | Female     | Micronesia                    |
| USNM             | 361461          | Bikar Atoll      | Male       | Micronesia                    |
| USNM             | 361464          | Bikar Atoll      | Male       | Micronesia                    |
| USNM             | 361460          | Bikar Atoll      | Male       | Micronesia                    |
| USNM             | 361456          | Bikar Atoll      | Male       | Micronesia                    |
| USNM             | 361463          | Bikar Atoll      | Male       | Micronesia                    |
| USNM             | 361465          | Bikar Atoll      | Male       | Micronesia                    |
| USNM             | 361462          | Bikar Atoll      | Unknown    | Micronesia                    |
| USNM             | 302970          | Caroline Islands | Female     | Micronesia                    |
| USNM             | 282219          | Caroline Islands | Female     | Micronesia                    |
| USNM             | 282220          | Caroline Islands | Female     | Micronesia                    |
| USNM             | 282217          | Caroline Islands | Female     | Micronesia                    |
| USNM             | 278810          | Caroline Islands | Female     | Micronesia                    |
| USNM             | 278814          | Caroline Islands | Female     | Micronesia                    |
| USNM             | 278815          | Caroline Islands | Female     | Micronesia                    |
| USNM             | 278819          | Caroline Islands | Female     | Micronesia                    |
| USNM             | 278821          | Caroline Islands | Female     | Micronesia                    |
| USNM             | 278828          | Caroline Islands | Female     | Micronesia                    |
| USNM             | 278830          | Caroline Islands | Female     | Micronesia                    |
| USNM             | 278832          | Caroline Islands | Female     | Micronesia                    |
| USNM             | 278836          | Caroline Islands | Female     | Micronesia                    |
| USNM             | 278838          | Caroline Islands | Female     | Micronesia                    |
| USNM             | 278841          | Caroline Islands | Female     | Micronesia                    |
| USNM             | 278846          | Caroline Islands | Female     | Micronesia                    |
| USNM             | 278847          | Caroline Islands | Female     | Micronesia                    |
| USNM             | 278848          | Caroline Islands | Female     | Micronesia                    |
| USNM             | 361451          | Caroline Islands | Female     | Micronesia                    |
| USNM             | 278794          | Caroline Islands | Female     | Micronesia                    |
| USNM             | 278802          | Caroline Islands | Female     | Micronesia                    |
| USNM             | 278807          | Caroline Islands | Female     | Micronesia                    |
| USNM             | 278850          | Caroline Islands | Female     | Micronesia                    |
| USNM             | 282216          | Caroline Islands | Male       | Micronesia                    |
| USNM             | 278808          | Caroline Islands | Male       | Micronesia                    |
| USNM             | 278809          | Caroline Islands | Male       | Micronesia                    |
| USNM             | 278811          | Caroline Islands | Male       | Micronesia                    |
| USNM             | 278812          | Caroline Islands | Male       | Micronesia                    |
| USNM             | 278813          | Caroline Islands | Male       | Micronesia                    |
| USNM             | 278816          | Caroline Islands | Male       | Micronesia                    |
| USNM             | 278817          | Caroline Islands | Male       | Micronesia                    |
| USNM             | 278818          | Caroline Islands | Male       | Micronesia                    |
| USNM             | 278820          | Caroline Islands | Male       | Micronesia                    |
| USNM             | 278822          | Caroline Islands | Male       | Micronesia                    |
| USNM             | 278823          | Caroline Islands | Male       | Micronesia                    |
| USNM             | 278824          | Caroline Islands | Male       | Micronesia                    |
| USNM             | 278825          | Caroline Islands | Male       | Micronesia                    |
| USNM             | 278826          | Caroline Islands | Male       | Micronesia                    |
| USNM             | 278827          | Caroline Islands | Male       | Micronesia                    |
| USNM             | 278829          | Caroline Islands | Male       | Micronesia                    |
| USNM             | 278831          | Caroline Islands | Male       | Micronesia                    |
| USNM             | 278834          | Caroline Islands | Male       | Micronesia                    |
| USNM             | 278835          | Caroline Islands | Male       | Micronesia                    |
| USNM             | 278837          | Caroline Islands | Male       | Micronesia                    |
| USNM             | 278839          | Caroline Islands | Male       | Micronesia                    |
| USNM             | 278840          | Caroline Islands | Male       | Micronesia                    |
| USNM             | 278842          | Caroline Islands | Male       | Micronesia                    |
| USNM             | 278843          | Caroline Islands | Male       | Micronesia                    |
| USNM             | 278844          | Caroline Islands | Male       | Micronesia                    |
| USNM             | 278845          | Caroline Islands | Male       | Micronesia                    |
| USNM             | 278849          | Caroline Islands | Male       | Micronesia                    |
| USNM             | 361450          | Caroline Islands | Male       | Micronesia                    |
| USNM             | 278791          | Caroline Islands | Male       | Micronesia                    |
| USNM             | 278792          | Caroline Islands | Male       | Micronesia                    |
| USNM             | 278793          | Caroline Islands | Male       | Micronesia                    |

| <b>Institute</b> | <b>Specimen</b> | <b>Island</b>    | <b>Sex</b> | <b>Biogeographical region</b> |
|------------------|-----------------|------------------|------------|-------------------------------|
| USNM             | 278795          | Caroline Islands | Male       | Micronesia                    |
| USNM             | 278796          | Caroline Islands | Male       | Micronesia                    |
| USNM             | 278797          | Caroline Islands | Male       | Micronesia                    |
| USNM             | 278798          | Caroline Islands | Male       | Micronesia                    |
| USNM             | 278799          | Caroline Islands | Male       | Micronesia                    |
| USNM             | 278803          | Caroline Islands | Male       | Micronesia                    |
| USNM             | 278804          | Caroline Islands | Male       | Micronesia                    |
| USNM             | 278805          | Caroline Islands | Male       | Micronesia                    |
| USNM             | 278806          | Caroline Islands | Male       | Micronesia                    |
| USNM             | 303316          | Caroline Islands | Male       | Micronesia                    |
| USNM             | 278851          | Caroline Islands | Male       | Micronesia                    |
| USNM             | 278852          | Caroline Islands | Male       | Micronesia                    |
| USNM             | 278853          | Caroline Islands | Male       | Micronesia                    |
| USNM             | 278854          | Caroline Islands | Male       | Micronesia                    |
| USNM             | 278918          | Guam             | Female     | Micronesia                    |
| USNM             | 278439          | Guam             | Female     | Micronesia                    |
| USNM             | 278920          | Guam             | Female     | Micronesia                    |
| USNM             | 278922          | Guam             | Female     | Micronesia                    |
| USNM             | 278926          | Guam             | Female     | Micronesia                    |
| USNM             | 278927          | Guam             | Female     | Micronesia                    |
| USNM             | 278928          | Guam             | Female     | Micronesia                    |
| USNM             | 278932          | Guam             | Female     | Micronesia                    |
| USNM             | 278933          | Guam             | Female     | Micronesia                    |
| USNM             | 278936          | Guam             | Female     | Micronesia                    |
| USNM             | 278938          | Guam             | Female     | Micronesia                    |
| USNM             | 277470          | Guam             | Female     | Micronesia                    |
| USNM             | 278365          | Guam             | Female     | Micronesia                    |
| USNM             | 278369          | Guam             | Female     | Micronesia                    |
| USNM             | 278374          | Guam             | Female     | Micronesia                    |
| USNM             | 278375          | Guam             | Female     | Micronesia                    |
| USNM             | 278437          | Guam             | Female     | Micronesia                    |
| USNM             | 278906          | Guam             | Female     | Micronesia                    |
| USNM             | 278909          | Guam             | Female     | Micronesia                    |
| USNM             | 278910          | Guam             | Female     | Micronesia                    |
| USNM             | 278438          | Guam             | Male       | Micronesia                    |
| USNM             | 278917          | Guam             | Male       | Micronesia                    |
| USNM             | 278919          | Guam             | Male       | Micronesia                    |
| USNM             | 278921          | Guam             | Male       | Micronesia                    |
| USNM             | 278923          | Guam             | Male       | Micronesia                    |
| USNM             | 278924          | Guam             | Male       | Micronesia                    |
| USNM             | 278925          | Guam             | Male       | Micronesia                    |
| USNM             | 278929          | Guam             | Male       | Micronesia                    |
| USNM             | 278930          | Guam             | Male       | Micronesia                    |
| USNM             | 278931          | Guam             | Male       | Micronesia                    |
| USNM             | 278934          | Guam             | Male       | Micronesia                    |
| USNM             | 278935          | Guam             | Male       | Micronesia                    |
| USNM             | 278937          | Guam             | Male       | Micronesia                    |
| USNM             | 277466          | Guam             | Male       | Micronesia                    |
| USNM             | 277468          | Guam             | Male       | Micronesia                    |
| USNM             | 277471          | Guam             | Male       | Micronesia                    |
| USNM             | 277472          | Guam             | Male       | Micronesia                    |
| USNM             | 277473          | Guam             | Male       | Micronesia                    |
| USNM             | 278366          | Guam             | Male       | Micronesia                    |
| USNM             | 278367          | Guam             | Male       | Micronesia                    |
| USNM             | 278368          | Guam             | Male       | Micronesia                    |
| USNM             | 278370          | Guam             | Male       | Micronesia                    |
| USNM             | 278371          | Guam             | Male       | Micronesia                    |
| USNM             | 278372          | Guam             | Male       | Micronesia                    |
| USNM             | 278373          | Guam             | Male       | Micronesia                    |
| USNM             | 278376          | Guam             | Male       | Micronesia                    |
| USNM             | 278377          | Guam             | Male       | Micronesia                    |
| USNM             | 278378          | Guam             | Male       | Micronesia                    |
| USNM             | 278430          | Guam             | Male       | Micronesia                    |
| USNM             | 278433          | Guam             | Male       | Micronesia                    |
| USNM             | 278434          | Guam             | Male       | Micronesia                    |
| USNM             | 278907          | Guam             | Male       | Micronesia                    |

| <b>Institute</b> | <b>Specimen</b> | <b>Island</b>    | <b>Sex</b> | <b>Biogeographical region</b> |
|------------------|-----------------|------------------|------------|-------------------------------|
| USNM             | 278908          | Guam             | Male       | Micronesia                    |
| USNM             | 278911          | Guam             | Male       | Micronesia                    |
| USNM             | 278912          | Guam             | Male       | Micronesia                    |
| USNM             | 278913          | Guam             | Male       | Micronesia                    |
| USNM             | 278914          | Guam             | Male       | Micronesia                    |
| USNM             | 278915          | Guam             | Male       | Micronesia                    |
| USNM             | 278916          | Guam             | Male       | Micronesia                    |
| USNM             | 278428          | Guam             | Male       | Micronesia                    |
| USNM             | 278429          | Guam             | Male       | Micronesia                    |
| USNM             | 530805          | Guguan Island    | Male       | Micronesia                    |
| USNM             | 530806          | Guguan Island    | Male       | Micronesia                    |
| USNM             | 279397          | Koror Island     | Female     | Micronesia                    |
| USNM             | 279472          | Koror Island     | Female     | Micronesia                    |
| USNM             | 279476          | Koror Island     | Female     | Micronesia                    |
| USNM             | 279477          | Koror Island     | Female     | Micronesia                    |
| USNM             | 279478          | Koror Island     | Female     | Micronesia                    |
| USNM             | 279479          | Koror Island     | Female     | Micronesia                    |
| USNM             | 279398          | Koror Island     | Male       | Micronesia                    |
| USNM             | 279393          | Koror Island     | Male       | Micronesia                    |
| USNM             | 279394          | Koror Island     | Male       | Micronesia                    |
| USNM             | 279395          | Koror Island     | Male       | Micronesia                    |
| USNM             | 279396          | Koror Island     | Male       | Micronesia                    |
| USNM             | 279399          | Koror Island     | Male       | Micronesia                    |
| USNM             | 279471          | Koror Island     | Male       | Micronesia                    |
| USNM             | 279473          | Koror Island     | Male       | Micronesia                    |
| USNM             | 279474          | Koror Island     | Male       | Micronesia                    |
| USNM             | 279475          | Koror Island     | Male       | Micronesia                    |
| USNM             | 302969          | Kosrae           | Female     | Micronesia                    |
| USNM             | 297272          | Kosrae           | Male       | Micronesia                    |
| USNM             | 297273          | Kosrae           | Male       | Micronesia                    |
| USNM             | 297274          | Kosrae           | Male       | Micronesia                    |
| USNM             | 306278          | Majuro Atoll     | Female     | Micronesia                    |
| USNM             | 306274          | Majuro Atoll     | Male       | Micronesia                    |
| USNM             | 306275          | Majuro Atoll     | Male       | Micronesia                    |
| USNM             | 306276          | Majuro Atoll     | Male       | Micronesia                    |
| USNM             | 306277          | Majuro Atoll     | Male       | Micronesia                    |
| USNM             | 308266          | Majuro Atoll     | Male       | Micronesia                    |
| USNM             | 308268          | Majuro Atoll     | Male       | Micronesia                    |
| USNM             | 308269          | Majuro Atoll     | Male       | Micronesia                    |
| USNM             | 308270          | Majuro Atoll     | Male       | Micronesia                    |
| USNM             | 308267          | Majuro Atoll     | Male       | Micronesia                    |
| USNM             | 276634          | Marshall Islands | Female     | Micronesia                    |
| USNM             | 276635          | Marshall Islands | Female     | Micronesia                    |
| USNM             | 538393          | Marshall Islands | Female     | Micronesia                    |
| USNM             | 538394          | Marshall Islands | Female     | Micronesia                    |
| USNM             | 276632          | Marshall Islands | Male       | Micronesia                    |
| USNM             | 276633          | Marshall Islands | Male       | Micronesia                    |
| USNM             | 276636          | Marshall Islands | Unknown    | Micronesia                    |
| USNM             | 278675          | Peleliu Island   | Male       | Micronesia                    |
| USNM             | 306280          | Pohnpei Island   | Female     | Micronesia                    |
| USNM             | 306283          | Pohnpei Island   | Female     | Micronesia                    |
| USNM             | 306281          | Pohnpei Island   | Female     | Micronesia                    |
| USNM             | 302009          | Pohnpei Island   | Female     | Micronesia                    |
| USNM             | 302011          | Pohnpei Island   | Female     | Micronesia                    |
| USNM             | 302960          | Pohnpei Island   | Female     | Micronesia                    |
| USNM             | 302961          | Pohnpei Island   | Female     | Micronesia                    |
| USNM             | 302963          | Pohnpei Island   | Female     | Micronesia                    |
| USNM             | 302964          | Pohnpei Island   | Female     | Micronesia                    |
| USNM             | 302966          | Pohnpei Island   | Female     | Micronesia                    |
| USNM             | 302967          | Pohnpei Island   | Female     | Micronesia                    |
| USNM             | 302968          | Pohnpei Island   | Female     | Micronesia                    |
| USNM             | 283114          | Pohnpei Island   | Female     | Micronesia                    |
| USNM             | 301995          | Pohnpei Island   | Female     | Micronesia                    |
| USNM             | 301996          | Pohnpei Island   | Female     | Micronesia                    |
| USNM             | 301998          | Pohnpei Island   | Female     | Micronesia                    |
| USNM             | 301999          | Pohnpei Island   | Female     | Micronesia                    |

| <b>Institute</b> | <b>Specimen</b> | <b>Island</b>      | <b>Sex</b> | <b>Biogeographical region</b> |
|------------------|-----------------|--------------------|------------|-------------------------------|
| USNM             | 302002          | Pohnpei Island     | Female     | Micronesia                    |
| USNM             | 302003          | Pohnpei Island     | Female     | Micronesia                    |
| USNM             | 302005          | Pohnpei Island     | Female     | Micronesia                    |
| USNM             | 302006          | Pohnpei Island     | Female     | Micronesia                    |
| USNM             | 302007          | Pohnpei Island     | Female     | Micronesia                    |
| USNM             | 302008          | Pohnpei Island     | Female     | Micronesia                    |
| USNM             | 306279          | Pohnpei Island     | Male       | Micronesia                    |
| USNM             | 302010          | Pohnpei Island     | Male       | Micronesia                    |
| USNM             | 302962          | Pohnpei Island     | Male       | Micronesia                    |
| USNM             | 302965          | Pohnpei Island     | Male       | Micronesia                    |
| USNM             | 306282          | Pohnpei Island     | Male       | Micronesia                    |
| USNM             | 301997          | Pohnpei Island     | Male       | Micronesia                    |
| USNM             | 302000          | Pohnpei Island     | Male       | Micronesia                    |
| USNM             | 302001          | Pohnpei Island     | Male       | Micronesia                    |
| USNM             | 302004          | Pohnpei Island     | Male       | Micronesia                    |
| USNM             | 277072          | Ponam              | Female     | Micronesia                    |
| USNM             | 282246          | Rongelap Atoll     | Female     | Micronesia                    |
| USNM             | 282247          | Rongelap Atoll     | Female     | Micronesia                    |
| USNM             | 282839          | Rongerik Atoll     | Male       | Micronesia                    |
| USNM             | 282840          | Rongerik Atoll     | Male       | Micronesia                    |
| USNM             | 282844          | Rongerik Atoll     | Male       | Micronesia                    |
| USNM             | 282845          | Rongerik Atoll     | Male       | Micronesia                    |
| USNM             | 279124          | Saipan Island      | Female     | Micronesia                    |
| USNM             | 298365          | Saipan Island      | Female     | Micronesia                    |
| USNM             | 298366          | Saipan Island      | Female     | Micronesia                    |
| USNM             | 277559          | Saipan Island      | Female     | Micronesia                    |
| USNM             | 277560          | Saipan Island      | Female     | Micronesia                    |
| USNM             | 277706          | Saipan Island      | Female     | Micronesia                    |
| USNM             | 277708          | Saipan Island      | Female     | Micronesia                    |
| USNM             | 277707          | Saipan Island      | Male       | Micronesia                    |
| USNM             | 361458          | Taka Atoll         | Male       | Micronesia                    |
| USNM             | 361459          | Taka Atoll         | Male       | Micronesia                    |
| USNM             | 277709          | Tinian Island      | Male       | Micronesia                    |
| USNM             | 277710          | Tinian Island      | Male       | Micronesia                    |
| USNM             | 243874          | Wake Island        | Female     | Micronesia                    |
| USNM             | 243887          | Wake Island        | Female     | Micronesia                    |
| USNM             | 243889          | Wake Island        | Female     | Micronesia                    |
| USNM             | 243876          | Wake Island        | Female     | Micronesia                    |
| USNM             | 243877          | Wake Island        | Female     | Micronesia                    |
| USNM             | 243878          | Wake Island        | Female     | Micronesia                    |
| USNM             | 243883          | Wake Island        | Female     | Micronesia                    |
| USNM             | 265392          | Wake Island        | Female     | Micronesia                    |
| USNM             | 243875          | Wake Island        | Male       | Micronesia                    |
| USNM             | 243879          | Wake Island        | Male       | Micronesia                    |
| USNM             | 243880          | Wake Island        | Male       | Micronesia                    |
| USNM             | 243881          | Wake Island        | Male       | Micronesia                    |
| USNM             | 243882          | Wake Island        | Male       | Micronesia                    |
| USNM             | 265391          | Wake Island        | Male       | Micronesia                    |
| USNM             | 243864          | Wake Island        | Male       | Micronesia                    |
| USNM             | 243868          | Wake Island        | Male       | Micronesia                    |
| USNM             | 243869          | Wake Island        | Male       | Micronesia                    |
| USNM             | 243870          | Wake Island        | Male       | Micronesia                    |
| USNM             | 243872          | Wake Island        | Male       | Micronesia                    |
| USNM             | 243873          | Wake Island        | Male       | Micronesia                    |
| USNM             | 243885          | Wake Island        | Male       | Micronesia                    |
| USNM             | 243886          | Wake Island        | Male       | Micronesia                    |
| USNM             | 300636          | Kapingamarangi Ato | Female     | Outlier (Polynesian Outlier)  |
| USNM             | 300638          | Kapingamarangi Ato | Female     | Outlier (Polynesian Outlier)  |
| USNM             | 300637          | Kapingamarangi Ato | Male       | Outlier (Polynesian Outlier)  |
| USNM             | 532911          | American Samoa     | Female     | Polynesia                     |
| USNM             | 532912          | American Samoa     | Female     | Polynesia                     |
| USNM             | 532904          | American Samoa     | Female     | Polynesia                     |
| USNM             | 532901          | American Samoa     | Female     | Polynesia                     |
| USNM             | 532902          | American Samoa     | Female     | Polynesia                     |
| USNM             | 532905          | American Samoa     | Female     | Polynesia                     |
| USNM             | 532906          | American Samoa     | Female     | Polynesia                     |



| <b>Institute</b> | <b>Specimen</b> | <b>Island</b>    | <b>Sex</b> | <b>Biogeographical region</b> |
|------------------|-----------------|------------------|------------|-------------------------------|
| USNM             | 532907          | American Samoa   | Female     | Polynesia                     |
| USNM             | 532903          | American Samoa   | Male       | Polynesia                     |
| USNM             | 532908          | American Samoa   | Male       | Polynesia                     |
| USNM             | 532909          | American Samoa   | Male       | Polynesia                     |
| USNM             | 532910          | American Samoa   | Male       | Polynesia                     |
| USNM             | 532913          | American Samoa   | Male       | Polynesia                     |
| USNM             | 360997          | Atafu Atoll      | Female     | Polynesia                     |
| USNM             | 360998          | Atafu Atoll      | Female     | Polynesia                     |
| USNM             | 532890          | Aunu'U Island    | Female     | Polynesia                     |
| USNM             | 532894          | Aunu'U Island    | Female     | Polynesia                     |
| USNM             | 532888          | Aunu'U Island    | Male       | Polynesia                     |
| USNM             | 532889          | Aunu'U Island    | Male       | Polynesia                     |
| USNM             | 532891          | Aunu'U Island    | Male       | Polynesia                     |
| USNM             | 532892          | Aunu'U Island    | Male       | Polynesia                     |
| USNM             | 532893          | Aunu'U Island    | Male       | Polynesia                     |
| USNM             | 282127          | Bikini Atoll     | Female     | Polynesia                     |
| USNM             | 282340          | Bikini Atoll     | Female     | Polynesia                     |
| USNM             | 536411          | Bikini Atoll     | Female     | Polynesia                     |
| USNM             | 282125          | Bikini Atoll     | Male       | Polynesia                     |
| USNM             | 282126          | Bikini Atoll     | Male       | Polynesia                     |
| USNM             | 282128          | Bikini Atoll     | Male       | Polynesia                     |
| USNM             | 282129          | Bikini Atoll     | Male       | Polynesia                     |
| USNM             | 282130          | Bikini Atoll     | Male       | Polynesia                     |
| USNM             | 282131          | Bikini Atoll     | Male       | Polynesia                     |
| USNM             | 282132          | Bikini Atoll     | Male       | Polynesia                     |
| USNM             | 282133          | Bikini Atoll     | Male       | Polynesia                     |
| USNM             | 536410          | Bikini Atoll     | Male       | Polynesia                     |
| USNM             | 536412          | Bikini Atoll     | Male       | Polynesia                     |
| USNM             | 536413          | Bikini Atoll     | Male       | Polynesia                     |
| USNM             | 338660          | Birnie Atoll     | Female     | Polynesia                     |
| USNM             | 338661          | Birnie Atoll     | Female     | Polynesia                     |
| USNM             | 338662          | Birnie Atoll     | Female     | Polynesia                     |
| USNM             | 338664          | Birnie Atoll     | Female     | Polynesia                     |
| USNM             | 338663          | Birnie Atoll     | Female     | Polynesia                     |
| USNM             | 338673          | Birnie Atoll     | Female     | Polynesia                     |
| USNM             | 338658          | Birnie Atoll     | Male       | Polynesia                     |
| USNM             | 361454          | Birnie Atoll     | Male       | Polynesia                     |
| USNM             | 338665          | Birnie Atoll     | Male       | Polynesia                     |
| USNM             | 338667          | Birnie Atoll     | Male       | Polynesia                     |
| USNM             | 338670          | Birnie Atoll     | Male       | Polynesia                     |
| USNM             | 338672          | Birnie Atoll     | Male       | Polynesia                     |
| USNM             | 338674          | Birnie Atoll     | Male       | Polynesia                     |
| USNM             | 338675          | Birnie Atoll     | Male       | Polynesia                     |
| USNM             | 338679          | Birnie Atoll     | Male       | Polynesia                     |
| USNM             | 338680          | Birnie Atoll     | Male       | Polynesia                     |
| USNM             | 338682          | Birnie Atoll     | Male       | Polynesia                     |
| USNM             | 361452          | Birnie Atoll     | Male       | Polynesia                     |
| USNM             | 338666          | Birnie Atoll     | Male       | Polynesia                     |
| USNM             | 338668          | Birnie Atoll     | Male       | Polynesia                     |
| USNM             | 338669          | Birnie Atoll     | Male       | Polynesia                     |
| USNM             | 338676          | Birnie Atoll     | Male       | Polynesia                     |
| USNM             | 338677          | Birnie Atoll     | Male       | Polynesia                     |
| USNM             | 338678          | Birnie Atoll     | Male       | Polynesia                     |
| USNM             | 338671          | Birnie Atoll     | Unknown    | Polynesia                     |
| USNM             | 338681          | Birnie Atoll     | Unknown    | Polynesia                     |
| USNM             | 338688          | Christmas Island | Male       | Polynesia                     |
| USNM             | 338685          | Christmas Island | Unknown    | Polynesia                     |
| USNM             | 338687          | Christmas Island | Unknown    | Polynesia                     |
| USNM             | 538392          | Enewetok Atoll   | Female     | Polynesia                     |
| USNM             | 448344          | Enewetok Atoll   | Male       | Polynesia                     |
| USNM             | 360994          | Fakaofu Atoll    | Female     | Polynesia                     |
| USNM             | 360993          | Fakaofu Atoll    | Male       | Polynesia                     |
| USNM             | 257425          | Hatutaa Island   | Female     | Polynesia                     |
| USNM             | 257427          | Hatutaa Island   | Female     | Polynesia                     |
| USNM             | 257428          | Hatutaa Island   | Male       | Polynesia                     |
| USNM             | 257426          | Hatutaa Island   | Male       | Polynesia                     |

| <b>Institute</b> | <b>Specimen</b> | <b>Island</b>    | <b>Sex</b> | <b>Biogeographical region</b> |
|------------------|-----------------|------------------|------------|-------------------------------|
| USNM             | 324887          | Hawaii           | Female     | Polynesia                     |
| USNM             | 324890          | Hawaii           | Female     | Polynesia                     |
| USNM             | 324891          | Hawaii           | Female     | Polynesia                     |
| USNM             | 324892          | Hawaii           | Female     | Polynesia                     |
| USNM             | 324893          | Hawaii           | Female     | Polynesia                     |
| USNM             | 324896          | Hawaii           | Female     | Polynesia                     |
| USNM             | 324897          | Hawaii           | Female     | Polynesia                     |
| USNM             | 271390          | Hawaii           | Female     | Polynesia                     |
| USNM             | 271391          | Hawaii           | Female     | Polynesia                     |
| USNM             | 257936          | Hawaii           | Female     | Polynesia                     |
| USNM             | 257939          | Hawaii           | Female     | Polynesia                     |
| USNM             | 257940          | Hawaii           | Female     | Polynesia                     |
| USNM             | 257942          | Hawaii           | Female     | Polynesia                     |
| USNM             | 257943          | Hawaii           | Female     | Polynesia                     |
| USNM             | 257944          | Hawaii           | Female     | Polynesia                     |
| USNM             | 257945          | Hawaii           | Female     | Polynesia                     |
| USNM             | 324885          | Hawaii           | Male       | Polynesia                     |
| USNM             | 324886          | Hawaii           | Male       | Polynesia                     |
| USNM             | 324888          | Hawaii           | Male       | Polynesia                     |
| USNM             | 324889          | Hawaii           | Male       | Polynesia                     |
| USNM             | 324894          | Hawaii           | Male       | Polynesia                     |
| USNM             | 324895          | Hawaii           | Male       | Polynesia                     |
| USNM             | 556523          | Hawaii           | Male       | Polynesia                     |
| USNM             | 271388          | Hawaii           | Male       | Polynesia                     |
| USNM             | 271389          | Hawaii           | Male       | Polynesia                     |
| USNM             | 257937          | Hawaii           | Male       | Polynesia                     |
| USNM             | 257938          | Hawaii           | Male       | Polynesia                     |
| USNM             | 257941          | Hawaii           | Male       | Polynesia                     |
| USNM             | 257946          | Hawaii           | Male       | Polynesia                     |
| USNM             | 257947          | Hawaii           | Male       | Polynesia                     |
| USNM             | 99673           | Hawaiian Islands | Unknown    | Polynesia                     |
| USNM             | 361431          | Kanton Island    | Female     | Polynesia                     |
| USNM             | 361433          | Kanton Island    | Female     | Polynesia                     |
| USNM             | 361436          | Kanton Island    | Female     | Polynesia                     |
| USNM             | 361437          | Kanton Island    | Female     | Polynesia                     |
| USNM             | 361439          | Kanton Island    | Female     | Polynesia                     |
| USNM             | 361432          | Kanton Island    | Male       | Polynesia                     |
| USNM             | 361434          | Kanton Island    | Male       | Polynesia                     |
| USNM             | 269149          | Kanton Island    | Unknown    | Polynesia                     |
| USNM             | 361435          | Kanton Island    | Unknown    | Polynesia                     |
| USNM             | 570868          | Kauai            | Female     | Polynesia                     |
| USNM             | 338683          | Kiritimati       | Unknown    | Polynesia                     |
| USNM             | 338684          | Kiritimati       | Unknown    | Polynesia                     |
| USNM             | 338686          | Kiritimati       | Unknown    | Polynesia                     |
| USNM             | 338629          | Kure Atoll       | Female     | Polynesia                     |
| USNM             | 361417          | Kure Atoll       | Female     | Polynesia                     |
| USNM             | 361425          | Kure Atoll       | Female     | Polynesia                     |
| USNM             | 355886          | Kure Atoll       | Female     | Polynesia                     |
| USNM             | 243900          | Kure Atoll       | Female     | Polynesia                     |
| USNM             | 243901          | Kure Atoll       | Female     | Polynesia                     |
| USNM             | 338631          | Kure Atoll       | Female     | Polynesia                     |
| USNM             | 355879          | Kure Atoll       | Female     | Polynesia                     |
| USNM             | 361376          | Kure Atoll       | Female     | Polynesia                     |
| USNM             | 361378          | Kure Atoll       | Female     | Polynesia                     |
| USNM             | 361379          | Kure Atoll       | Female     | Polynesia                     |
| USNM             | 361381          | Kure Atoll       | Female     | Polynesia                     |
| USNM             | 361382          | Kure Atoll       | Female     | Polynesia                     |
| USNM             | 361383          | Kure Atoll       | Female     | Polynesia                     |
| USNM             | 355757          | Kure Atoll       | Female     | Polynesia                     |
| USNM             | 355760          | Kure Atoll       | Female     | Polynesia                     |
| USNM             | 355761          | Kure Atoll       | Female     | Polynesia                     |
| USNM             | 355766          | Kure Atoll       | Female     | Polynesia                     |
| USNM             | 355771          | Kure Atoll       | Female     | Polynesia                     |
| USNM             | 355772          | Kure Atoll       | Female     | Polynesia                     |
| USNM             | 355878          | Kure Atoll       | Female     | Polynesia                     |
| USNM             | 355880          | Kure Atoll       | Female     | Polynesia                     |

| <b>Institute</b> | <b>Specimen</b> | <b>Island</b>  | <b>Sex</b> | <b>Biogeographical region</b> |
|------------------|-----------------|----------------|------------|-------------------------------|
| USNM             | 355881          | Kure Atoll     | Female     | Polynesia                     |
| USNM             | 355883          | Kure Atoll     | Female     | Polynesia                     |
| USNM             | 355884          | Kure Atoll     | Female     | Polynesia                     |
| USNM             | 243890          | Kure Atoll     | Male       | Polynesia                     |
| USNM             | 243891          | Kure Atoll     | Male       | Polynesia                     |
| USNM             | 243892          | Kure Atoll     | Male       | Polynesia                     |
| USNM             | 243893          | Kure Atoll     | Male       | Polynesia                     |
| USNM             | 243894          | Kure Atoll     | Male       | Polynesia                     |
| USNM             | 243895          | Kure Atoll     | Male       | Polynesia                     |
| USNM             | 243896          | Kure Atoll     | Male       | Polynesia                     |
| USNM             | 243897          | Kure Atoll     | Male       | Polynesia                     |
| USNM             | 243898          | Kure Atoll     | Male       | Polynesia                     |
| USNM             | 243899          | Kure Atoll     | Male       | Polynesia                     |
| USNM             | 243902          | Kure Atoll     | Male       | Polynesia                     |
| USNM             | 338630          | Kure Atoll     | Male       | Polynesia                     |
| USNM             | 338632          | Kure Atoll     | Male       | Polynesia                     |
| USNM             | 338653          | Kure Atoll     | Male       | Polynesia                     |
| USNM             | 338654          | Kure Atoll     | Male       | Polynesia                     |
| USNM             | 355876          | Kure Atoll     | Male       | Polynesia                     |
| USNM             | 361377          | Kure Atoll     | Male       | Polynesia                     |
| USNM             | 361380          | Kure Atoll     | Male       | Polynesia                     |
| USNM             | 361384          | Kure Atoll     | Male       | Polynesia                     |
| USNM             | 361385          | Kure Atoll     | Male       | Polynesia                     |
| USNM             | 361386          | Kure Atoll     | Male       | Polynesia                     |
| USNM             | 361387          | Kure Atoll     | Male       | Polynesia                     |
| USNM             | 355758          | Kure Atoll     | Male       | Polynesia                     |
| USNM             | 355759          | Kure Atoll     | Male       | Polynesia                     |
| USNM             | 355762          | Kure Atoll     | Male       | Polynesia                     |
| USNM             | 355763          | Kure Atoll     | Male       | Polynesia                     |
| USNM             | 355764          | Kure Atoll     | Male       | Polynesia                     |
| USNM             | 355765          | Kure Atoll     | Male       | Polynesia                     |
| USNM             | 355767          | Kure Atoll     | Male       | Polynesia                     |
| USNM             | 355768          | Kure Atoll     | Male       | Polynesia                     |
| USNM             | 355769          | Kure Atoll     | Male       | Polynesia                     |
| USNM             | 355770          | Kure Atoll     | Male       | Polynesia                     |
| USNM             | 355877          | Kure Atoll     | Male       | Polynesia                     |
| USNM             | 355882          | Kure Atoll     | Male       | Polynesia                     |
| USNM             | 355885          | Kure Atoll     | Male       | Polynesia                     |
| USNM             | 361426          | Kure Atoll     | Male       | Polynesia                     |
| USNM             | 288022          | Kure Atoll     | Unknown    | Polynesia                     |
| USNM             | 361414          | Manra Island   | Female     | Polynesia                     |
| USNM             | 257023          | Maui           | Female     | Polynesia                     |
| USNM             | 257926          | Maui           | Female     | Polynesia                     |
| USNM             | 257928          | Maui           | Female     | Polynesia                     |
| USNM             | 257930          | Maui           | Female     | Polynesia                     |
| USNM             | 257931          | Maui           | Female     | Polynesia                     |
| USNM             | 257933          | Maui           | Female     | Polynesia                     |
| USNM             | 257934          | Maui           | Female     | Polynesia                     |
| USNM             | 257935          | Maui           | Male       | Polynesia                     |
| USNM             | 257022          | Maui           | Male       | Polynesia                     |
| USNM             | 257925          | Maui           | Male       | Polynesia                     |
| USNM             | 257927          | Maui           | Male       | Polynesia                     |
| USNM             | 257929          | Maui           | Male       | Polynesia                     |
| USNM             | 257932          | Maui           | Male       | Polynesia                     |
| USNM             | 360996          | Nukunonu Atoll | Female     | Polynesia                     |
| USNM             | 360995          | Nukunonu Atoll | Male       | Polynesia                     |
| USNM             | 240915          | Oahu           | Female     | Polynesia                     |
| USNM             | 257953          | Oahu           | Female     | Polynesia                     |
| USNM             | 257954          | Oahu           | Female     | Polynesia                     |
| USNM             | 257955          | Oahu           | Female     | Polynesia                     |
| USNM             | 257956          | Oahu           | Female     | Polynesia                     |
| USNM             | 257959          | Oahu           | Female     | Polynesia                     |
| USNM             | 236897          | Oahu           | Female     | Polynesia                     |
| USNM             | 236898          | Oahu           | Female     | Polynesia                     |
| USNM             | 236899          | Oahu           | Female     | Polynesia                     |
| USNM             | 240917          | Oahu           | Female     | Polynesia                     |

| Institute | Specimen | Island             | Sex     | Biogeographical region |
|-----------|----------|--------------------|---------|------------------------|
| USNM      | 257949   | Oahu               | Female  | Polynesia              |
| USNM      | 257110   | Oahu               | Female  | Polynesia              |
| USNM      | 257111   | Oahu               | Female  | Polynesia              |
| USNM      | 243905   | Oahu               | Male    | Polynesia              |
| USNM      | 361467   | Oahu               | Male    | Polynesia              |
| USNM      | 257952   | Oahu               | Male    | Polynesia              |
| USNM      | 257957   | Oahu               | Male    | Polynesia              |
| USNM      | 257958   | Oahu               | Male    | Polynesia              |
| USNM      | 236896   | Oahu               | Male    | Polynesia              |
| USNM      | 236900   | Oahu               | Male    | Polynesia              |
| USNM      | 236901   | Oahu               | Male    | Polynesia              |
| USNM      | 240916   | Oahu               | Male    | Polynesia              |
| USNM      | 257948   | Oahu               | Male    | Polynesia              |
| USNM      | 257950   | Oahu               | Male    | Polynesia              |
| USNM      | 257109   | Oahu               | Male    | Polynesia              |
| USNM      | 243906   | Oahu               | Male    | Polynesia              |
| USNM      | 257951   | Oahu               | Unknown | Polynesia              |
| USNM      | 294551   | Onotoa Atoll       | Female  | Polynesia              |
| USNM      | 294547   | Onotoa Atoll       | Male    | Polynesia              |
| USNM      | 294549   | Onotoa Atoll       | Male    | Polynesia              |
| USNM      | 294550   | Onotoa Atoll       | Male    | Polynesia              |
| USNM      | 294548   | Onotoa Atoll       | Unknown | Polynesia              |
| USNM      | 361430   | Orona Atoll        | Male    | Polynesia              |
| USNM      | 269148   | Orona Atoll        | Unknown | Polynesia              |
| USNM      | 294991   | Raroia Atoll       | Female  | Polynesia              |
| USNM      | 294994   | Raroia Atoll       | Female  | Polynesia              |
| USNM      | 294995   | Raroia Atoll       | Female  | Polynesia              |
| USNM      | 294996   | Raroia Atoll       | Female  | Polynesia              |
| USNM      | 294992   | Raroia Atoll       | Male    | Polynesia              |
| USNM      | 294993   | Raroia Atoll       | Male    | Polynesia              |
| USNM      | 294997   | Raroia Atoll       | Male    | Polynesia              |
| USNM      | 532898   | Rose Atoll         | Female  | Polynesia              |
| USNM      | 532900   | Rose Atoll         | Female  | Polynesia              |
| USNM      | 532897   | Rose Atoll         | Male    | Polynesia              |
| USNM      | 532895   | Rose Atoll         | Male    | Polynesia              |
| USNM      | 532896   | Rose Atoll         | Male    | Polynesia              |
| USNM      | 532899   | Rose Atoll         | Male    | Polynesia              |
| USNM      | 362194   | Swains Island      | Female  | Polynesia              |
| USNM      | 362197   | Swains Island      | Female  | Polynesia              |
| USNM      | 362192   | Swains Island      | Female  | Polynesia              |
| USNM      | 362195   | Swains Island      | Female  | Polynesia              |
| USNM      | 362198   | Swains Island      | Female  | Polynesia              |
| USNM      | 362199   | Swains Island      | Female  | Polynesia              |
| USNM      | 362201   | Swains Island      | Female  | Polynesia              |
| USNM      | 362202   | Swains Island      | Female  | Polynesia              |
| USNM      | 362193   | Swains Island      | Male    | Polynesia              |
| USNM      | 362196   | Swains Island      | Male    | Polynesia              |
| USNM      | 362200   | Swains Island      | Male    | Polynesia              |
| USNM      | 362203   | Swains Island      | Male    | Polynesia              |
| USNM      | 3730     | Tahiti             | Unknown | Polynesia              |
| USNM      | 256168   | Niuafo'Ou Island   | Female  | Polynesia              |
| USNM      | 256162   | Niuafo'Ou Island   | Male    | Polynesia              |
| USNM      | 256169   | Niuafo'Ou Island   | Male    | Polynesia              |
| USNM      | 8605     | Tuamotu Archipelag | Female  | Polynesia              |
| USNM      | 361438   | Vostok Island      | Female  | Polynesia              |
| USNM      | 361441   | Vostok Island      | Female  | Polynesia              |
| USNM      | 361443   | Vostok Island      | Female  | Polynesia              |
| USNM      | 361444   | Vostok Island      | Female  | Polynesia              |
| USNM      | 361449   | Vostok Island      | Female  | Polynesia              |
| USNM      | 361442   | Vostok Island      | Male    | Polynesia              |
| USNM      | 361445   | Vostok Island      | Male    | Polynesia              |
| USNM      | 361446   | Vostok Island      | Male    | Polynesia              |
| USNM      | 361447   | Vostok Island      | Male    | Polynesia              |
| USNM      | 361448   | Vostok Island      | Male    | Polynesia              |
| USNM      | 478039   | Palawan            | Female  | Sunda                  |
| USNM      | 478040   | Palawan            | Female  | Sunda                  |

| <b>Institute</b> | <b>Specimen</b> | <b>Island</b> | <b>Sex</b> | <b>Biogeographical region</b> |
|------------------|-----------------|---------------|------------|-------------------------------|
| USNM             | 478042          | Palawan       | Female     | Sunda                         |
| USNM             | 478043          | Palawan       | Female     | Sunda                         |
| USNM             | 478050          | Palawan       | Female     | Sunda                         |
| USNM             | 478063          | Palawan       | Female     | Sunda                         |
| USNM             | 478073          | Palawan       | Female     | Sunda                         |
| USNM             | 478041          | Palawan       | Female     | Sunda                         |
| USNM             | 478013          | Palawan       | Female     | Sunda                         |
| USNM             | 478014          | Palawan       | Female     | Sunda                         |
| USNM             | 478015          | Palawan       | Female     | Sunda                         |
| USNM             | 478017          | Palawan       | Female     | Sunda                         |
| USNM             | 478021          | Palawan       | Female     | Sunda                         |
| USNM             | 478022          | Palawan       | Female     | Sunda                         |
| USNM             | 478023          | Palawan       | Female     | Sunda                         |
| USNM             | 478026          | Palawan       | Female     | Sunda                         |
| USNM             | 478028          | Palawan       | Female     | Sunda                         |
| USNM             | 478031          | Palawan       | Female     | Sunda                         |
| USNM             | 478032          | Palawan       | Female     | Sunda                         |
| USNM             | 478033          | Palawan       | Female     | Sunda                         |
| USNM             | 478047          | Palawan       | Female     | Sunda                         |
| USNM             | 478053          | Palawan       | Female     | Sunda                         |
| USNM             | 478054          | Palawan       | Female     | Sunda                         |
| USNM             | 478055          | Palawan       | Female     | Sunda                         |
| USNM             | 478056          | Palawan       | Female     | Sunda                         |
| USNM             | 478058          | Palawan       | Female     | Sunda                         |
| USNM             | 478062          | Palawan       | Female     | Sunda                         |
| USNM             | 478068          | Palawan       | Female     | Sunda                         |
| USNM             | 478074          | Palawan       | Female     | Sunda                         |
| USNM             | 478075          | Palawan       | Female     | Sunda                         |
| USNM             | 478078          | Palawan       | Female     | Sunda                         |
| USNM             | 478080          | Palawan       | Female     | Sunda                         |
| USNM             | 478082          | Palawan       | Female     | Sunda                         |
| USNM             | 478083          | Palawan       | Female     | Sunda                         |
| USNM             | 478085          | Palawan       | Female     | Sunda                         |
| USNM             | 478048          | Palawan       | Male       | Sunda                         |
| USNM             | 478049          | Palawan       | Male       | Sunda                         |
| USNM             | 478077          | Palawan       | Male       | Sunda                         |
| USNM             | 348619          | Palawan       | Male       | Sunda                         |
| USNM             | 478011          | Palawan       | Male       | Sunda                         |
| USNM             | 478012          | Palawan       | Male       | Sunda                         |
| USNM             | 478016          | Palawan       | Male       | Sunda                         |
| USNM             | 478019          | Palawan       | Male       | Sunda                         |
| USNM             | 478020          | Palawan       | Male       | Sunda                         |
| USNM             | 478024          | Palawan       | Male       | Sunda                         |
| USNM             | 478025          | Palawan       | Male       | Sunda                         |
| USNM             | 478030          | Palawan       | Male       | Sunda                         |
| USNM             | 478034          | Palawan       | Male       | Sunda                         |
| USNM             | 478035          | Palawan       | Male       | Sunda                         |
| USNM             | 478036          | Palawan       | Male       | Sunda                         |
| USNM             | 478037          | Palawan       | Male       | Sunda                         |
| USNM             | 478038          | Palawan       | Male       | Sunda                         |
| USNM             | 478044          | Palawan       | Male       | Sunda                         |
| USNM             | 478045          | Palawan       | Male       | Sunda                         |
| USNM             | 478046          | Palawan       | Male       | Sunda                         |
| USNM             | 478051          | Palawan       | Male       | Sunda                         |
| USNM             | 478052          | Palawan       | Male       | Sunda                         |
| USNM             | 478057          | Palawan       | Male       | Sunda                         |
| USNM             | 478059          | Palawan       | Male       | Sunda                         |
| USNM             | 478060          | Palawan       | Male       | Sunda                         |
| USNM             | 478061          | Palawan       | Male       | Sunda                         |
| USNM             | 478067          | Palawan       | Male       | Sunda                         |
| USNM             | 478069          | Palawan       | Male       | Sunda                         |
| USNM             | 478070          | Palawan       | Male       | Sunda                         |
| USNM             | 478071          | Palawan       | Male       | Sunda                         |
| USNM             | 478072          | Palawan       | Male       | Sunda                         |
| USNM             | 478079          | Palawan       | Male       | Sunda                         |
| USNM             | 478081          | Palawan       | Male       | Sunda                         |

| Institute | Specimen | Island             | Sex     | Biogeographical region |
|-----------|----------|--------------------|---------|------------------------|
| USNM      | 478084   | Palawan            | Male    | Sunda                  |
| USNM      | 478086   | Palawan            | Male    | Sunda                  |
| USNM      | 478087   | Palawan            | Male    | Sunda                  |
| USNM      | 478088   | Palawan            | Male    | Sunda                  |
| USNM      | 478027   | Palawan            | Unknown | Sunda                  |
| USNM      | 478076   | Palawan            | Unknown | Sunda                  |
| USNM      | 478018   | Palawan            | Unknown | Sunda                  |
| USNM      | 478029   | Palawan            | Unknown | Sunda                  |
| USNM      | 144635   | Basilan Island     | Male    | Wallacea               |
| USNM      | 144634   | Basilan Island     | Male    | Wallacea               |
| USNM      | 144636   | Basilan Island     | Male    | Wallacea               |
| USNM      | 478090   | Busuanga Island    | Female  | Wallacea               |
| USNM      | 478091   | Busuanga Island    | Female  | Wallacea               |
| USNM      | 478094   | Busuanga Island    | Female  | Wallacea               |
| USNM      | 478095   | Busuanga Island    | Female  | Wallacea               |
| USNM      | 478096   | Busuanga Island    | Female  | Wallacea               |
| USNM      | 478099   | Busuanga Island    | Female  | Wallacea               |
| USNM      | 478100   | Busuanga Island    | Female  | Wallacea               |
| USNM      | 478103   | Busuanga Island    | Female  | Wallacea               |
| USNM      | 478089   | Busuanga Island    | Male    | Wallacea               |
| USNM      | 478092   | Busuanga Island    | Male    | Wallacea               |
| USNM      | 478093   | Busuanga Island    | Male    | Wallacea               |
| USNM      | 478097   | Busuanga Island    | Male    | Wallacea               |
| USNM      | 478098   | Busuanga Island    | Male    | Wallacea               |
| USNM      | 478101   | Busuanga Island    | Male    | Wallacea               |
| USNM      | 478102   | Busuanga Island    | Male    | Wallacea               |
| USNM      | 478104   | Busuanga Island    | Male    | Wallacea               |
| USNM      | 478105   | Busuanga Island    | Male    | Wallacea               |
| USNM      | 155144   | Catanduanes Island | Female  | Wallacea               |
| USNM      | 219702   | Celebes            | Female  | Wallacea               |
| USNM      | 219697   | Celebes            | Female  | Wallacea               |
| USNM      | 217797   | Celebes            | Female  | Wallacea               |
| USNM      | 217798   | Celebes            | Female  | Wallacea               |
| USNM      | 217800   | Celebes            | Female  | Wallacea               |
| USNM      | 217722   | Celebes            | Female  | Wallacea               |
| USNM      | 217723   | Celebes            | Female  | Wallacea               |
| USNM      | 199911   | Celebes            | Female  | Wallacea               |
| USNM      | 199913   | Celebes            | Female  | Wallacea               |
| USNM      | 199919   | Celebes            | Female  | Wallacea               |
| USNM      | 199920   | Celebes            | Female  | Wallacea               |
| USNM      | 199921   | Celebes            | Female  | Wallacea               |
| USNM      | 199922   | Celebes            | Female  | Wallacea               |
| USNM      | 199931   | Celebes            | Female  | Wallacea               |
| USNM      | 199932   | Celebes            | Female  | Wallacea               |
| USNM      | 199933   | Celebes            | Female  | Wallacea               |
| USNM      | 216954   | Celebes            | Female  | Wallacea               |
| USNM      | 217796   | Celebes            | Female  | Wallacea               |
| USNM      | 257626   | Celebes            | Female  | Wallacea               |
| USNM      | 199974   | Celebes            | Female  | Wallacea               |
| USNM      | 199977   | Celebes            | Female  | Wallacea               |
| USNM      | 199978   | Celebes            | Female  | Wallacea               |
| USNM      | 199979   | Celebes            | Female  | Wallacea               |
| USNM      | 199980   | Celebes            | Female  | Wallacea               |
| USNM      | 199981   | Celebes            | Female  | Wallacea               |
| USNM      | 199982   | Celebes            | Female  | Wallacea               |
| USNM      | 199993   | Celebes            | Female  | Wallacea               |
| USNM      | 199994   | Celebes            | Female  | Wallacea               |
| USNM      | 199995   | Celebes            | Female  | Wallacea               |
| USNM      | 199956   | Celebes            | Female  | Wallacea               |
| USNM      | 199960   | Celebes            | Female  | Wallacea               |
| USNM      | 199965   | Celebes            | Female  | Wallacea               |
| USNM      | 199969   | Celebes            | Female  | Wallacea               |
| USNM      | 199938   | Celebes            | Female  | Wallacea               |
| USNM      | 199949   | Celebes            | Female  | Wallacea               |
| USNM      | 200016   | Celebes            | Female  | Wallacea               |
| USNM      | 200017   | Celebes            | Female  | Wallacea               |

| <b>Institute</b> | <b>Specimen</b> | <b>Island</b> | <b>Sex</b> | <b>Biogeographical region</b> |
|------------------|-----------------|---------------|------------|-------------------------------|
| USNM             | 200018          | Celebes       | Female     | Wallacea                      |
| USNM             | 200000          | Celebes       | Female     | Wallacea                      |
| USNM             | 200003          | Celebes       | Female     | Wallacea                      |
| USNM             | 200004          | Celebes       | Female     | Wallacea                      |
| USNM             | 219696          | Celebes       | Female     | Wallacea                      |
| USNM             | 219698          | Celebes       | Female     | Wallacea                      |
| USNM             | 219700          | Celebes       | Female     | Wallacea                      |
| USNM             | 496913          | Celebes       | Female     | Wallacea                      |
| USNM             | 496914          | Celebes       | Female     | Wallacea                      |
| USNM             | 496917          | Celebes       | Female     | Wallacea                      |
| USNM             | 496918          | Celebes       | Female     | Wallacea                      |
| USNM             | 496919          | Celebes       | Female     | Wallacea                      |
| USNM             | 496920          | Celebes       | Female     | Wallacea                      |
| USNM             | 496922          | Celebes       | Female     | Wallacea                      |
| USNM             | 496923          | Celebes       | Female     | Wallacea                      |
| USNM             | 496925          | Celebes       | Female     | Wallacea                      |
| USNM             | 496926          | Celebes       | Female     | Wallacea                      |
| USNM             | 496927          | Celebes       | Female     | Wallacea                      |
| USNM             | 496929          | Celebes       | Female     | Wallacea                      |
| USNM             | 496930          | Celebes       | Female     | Wallacea                      |
| USNM             | 496932          | Celebes       | Female     | Wallacea                      |
| USNM             | 496933          | Celebes       | Female     | Wallacea                      |
| USNM             | 496937          | Celebes       | Female     | Wallacea                      |
| USNM             | 496938          | Celebes       | Female     | Wallacea                      |
| USNM             | 496939          | Celebes       | Female     | Wallacea                      |
| USNM             | 496940          | Celebes       | Female     | Wallacea                      |
| USNM             | 496943          | Celebes       | Female     | Wallacea                      |
| USNM             | 496944          | Celebes       | Female     | Wallacea                      |
| USNM             | 496946          | Celebes       | Female     | Wallacea                      |
| USNM             | 496952          | Celebes       | Female     | Wallacea                      |
| USNM             | 496954          | Celebes       | Female     | Wallacea                      |
| USNM             | 496956          | Celebes       | Female     | Wallacea                      |
| USNM             | 496957          | Celebes       | Female     | Wallacea                      |
| USNM             | 496958          | Celebes       | Female     | Wallacea                      |
| USNM             | 496960          | Celebes       | Female     | Wallacea                      |
| USNM             | 496961          | Celebes       | Female     | Wallacea                      |
| USNM             | 496964          | Celebes       | Female     | Wallacea                      |
| USNM             | 257624          | Celebes       | Female     | Wallacea                      |
| USNM             | 199984          | Celebes       | Female     | Wallacea                      |
| USNM             | 217799          | Celebes       | Male       | Wallacea                      |
| USNM             | 217801          | Celebes       | Male       | Wallacea                      |
| USNM             | 199912          | Celebes       | Male       | Wallacea                      |
| USNM             | 199914          | Celebes       | Male       | Wallacea                      |
| USNM             | 199915          | Celebes       | Male       | Wallacea                      |
| USNM             | 199917          | Celebes       | Male       | Wallacea                      |
| USNM             | 199923          | Celebes       | Male       | Wallacea                      |
| USNM             | 199924          | Celebes       | Male       | Wallacea                      |
| USNM             | 199925          | Celebes       | Male       | Wallacea                      |
| USNM             | 199928          | Celebes       | Male       | Wallacea                      |
| USNM             | 199929          | Celebes       | Male       | Wallacea                      |
| USNM             | 199934          | Celebes       | Male       | Wallacea                      |
| USNM             | 216965          | Celebes       | Male       | Wallacea                      |
| USNM             | 216966          | Celebes       | Male       | Wallacea                      |
| USNM             | 199975          | Celebes       | Male       | Wallacea                      |
| USNM             | 199983          | Celebes       | Male       | Wallacea                      |
| USNM             | 199985          | Celebes       | Male       | Wallacea                      |
| USNM             | 199986          | Celebes       | Male       | Wallacea                      |
| USNM             | 199988          | Celebes       | Male       | Wallacea                      |
| USNM             | 199989          | Celebes       | Male       | Wallacea                      |
| USNM             | 199990          | Celebes       | Male       | Wallacea                      |
| USNM             | 199955          | Celebes       | Male       | Wallacea                      |
| USNM             | 199958          | Celebes       | Male       | Wallacea                      |
| USNM             | 199959          | Celebes       | Male       | Wallacea                      |
| USNM             | 199961          | Celebes       | Male       | Wallacea                      |
| USNM             | 199962          | Celebes       | Male       | Wallacea                      |
| USNM             | 199963          | Celebes       | Male       | Wallacea                      |

| <b>Institute</b> | <b>Specimen</b> | <b>Island</b> | <b>Sex</b> | <b>Biogeographical region</b> |
|------------------|-----------------|---------------|------------|-------------------------------|
| USNM             | 199964          | Celebes       | Male       | Wallacea                      |
| USNM             | 199966          | Celebes       | Male       | Wallacea                      |
| USNM             | 199967          | Celebes       | Male       | Wallacea                      |
| USNM             | 199968          | Celebes       | Male       | Wallacea                      |
| USNM             | 199970          | Celebes       | Male       | Wallacea                      |
| USNM             | 199971          | Celebes       | Male       | Wallacea                      |
| USNM             | 199972          | Celebes       | Male       | Wallacea                      |
| USNM             | 199973          | Celebes       | Male       | Wallacea                      |
| USNM             | 199935          | Celebes       | Male       | Wallacea                      |
| USNM             | 199936          | Celebes       | Male       | Wallacea                      |
| USNM             | 199937          | Celebes       | Male       | Wallacea                      |
| USNM             | 199939          | Celebes       | Male       | Wallacea                      |
| USNM             | 199940          | Celebes       | Male       | Wallacea                      |
| USNM             | 199941          | Celebes       | Male       | Wallacea                      |
| USNM             | 199942          | Celebes       | Male       | Wallacea                      |
| USNM             | 199943          | Celebes       | Male       | Wallacea                      |
| USNM             | 199944          | Celebes       | Male       | Wallacea                      |
| USNM             | 199945          | Celebes       | Male       | Wallacea                      |
| USNM             | 199946          | Celebes       | Male       | Wallacea                      |
| USNM             | 199947          | Celebes       | Male       | Wallacea                      |
| USNM             | 199948          | Celebes       | Male       | Wallacea                      |
| USNM             | 199950          | Celebes       | Male       | Wallacea                      |
| USNM             | 199951          | Celebes       | Male       | Wallacea                      |
| USNM             | 199954          | Celebes       | Male       | Wallacea                      |
| USNM             | 200014          | Celebes       | Male       | Wallacea                      |
| USNM             | 200015          | Celebes       | Male       | Wallacea                      |
| USNM             | 199996          | Celebes       | Male       | Wallacea                      |
| USNM             | 199997          | Celebes       | Male       | Wallacea                      |
| USNM             | 199998          | Celebes       | Male       | Wallacea                      |
| USNM             | 199999          | Celebes       | Male       | Wallacea                      |
| USNM             | 200001          | Celebes       | Male       | Wallacea                      |
| USNM             | 200002          | Celebes       | Male       | Wallacea                      |
| USNM             | 200005          | Celebes       | Male       | Wallacea                      |
| USNM             | 200006          | Celebes       | Male       | Wallacea                      |
| USNM             | 200007          | Celebes       | Male       | Wallacea                      |
| USNM             | 200008          | Celebes       | Male       | Wallacea                      |
| USNM             | 200009          | Celebes       | Male       | Wallacea                      |
| USNM             | 200010          | Celebes       | Male       | Wallacea                      |
| USNM             | 200011          | Celebes       | Male       | Wallacea                      |
| USNM             | 200012          | Celebes       | Male       | Wallacea                      |
| USNM             | 200013          | Celebes       | Male       | Wallacea                      |
| USNM             | 219693          | Celebes       | Male       | Wallacea                      |
| USNM             | 219694          | Celebes       | Male       | Wallacea                      |
| USNM             | 219695          | Celebes       | Male       | Wallacea                      |
| USNM             | 219701          | Celebes       | Male       | Wallacea                      |
| USNM             | 219699          | Celebes       | Male       | Wallacea                      |
| USNM             | 199976          | Celebes       | Male       | Wallacea                      |
| USNM             | 496924          | Celebes       | Male       | Wallacea                      |
| USNM             | 496928          | Celebes       | Male       | Wallacea                      |
| USNM             | 496931          | Celebes       | Male       | Wallacea                      |
| USNM             | 496934          | Celebes       | Male       | Wallacea                      |
| USNM             | 496935          | Celebes       | Male       | Wallacea                      |
| USNM             | 496936          | Celebes       | Male       | Wallacea                      |
| USNM             | 496941          | Celebes       | Male       | Wallacea                      |
| USNM             | 496942          | Celebes       | Male       | Wallacea                      |
| USNM             | 496945          | Celebes       | Male       | Wallacea                      |
| USNM             | 496947          | Celebes       | Male       | Wallacea                      |
| USNM             | 496948          | Celebes       | Male       | Wallacea                      |
| USNM             | 496949          | Celebes       | Male       | Wallacea                      |
| USNM             | 496950          | Celebes       | Male       | Wallacea                      |
| USNM             | 496953          | Celebes       | Male       | Wallacea                      |
| USNM             | 496955          | Celebes       | Male       | Wallacea                      |
| USNM             | 496959          | Celebes       | Male       | Wallacea                      |
| USNM             | 496962          | Celebes       | Male       | Wallacea                      |
| USNM             | 257625          | Celebes       | Male       | Wallacea                      |
| USNM             | 496912          | Celebes       | Male       | Wallacea                      |



| <b>Institute</b> | <b>Specimen</b> | <b>Island</b> | <b>Sex</b> | <b>Biogeographical region</b> |
|------------------|-----------------|---------------|------------|-------------------------------|
| USNM             | 496915          | Celebes       | Male       | Wallacea                      |
| USNM             | 496916          | Celebes       | Male       | Wallacea                      |
| USNM             | 496921          | Celebes       | Male       | Wallacea                      |
| USNM             | 478107          | Culion Island | Female     | Wallacea                      |
| USNM             | 478108          | Culion Island | Female     | Wallacea                      |
| USNM             | 478110          | Culion Island | Female     | Wallacea                      |
| USNM             | 478106          | Culion Island | Male       | Wallacea                      |
| USNM             | 478109          | Culion Island | Male       | Wallacea                      |
| USNM             | 277414          | Leyte Island  | Female     | Wallacea                      |
| USNM             | 277692          | Leyte Island  | Unknown    | Wallacea                      |
| USNM             | 145848          | Luzon         | Female     | Wallacea                      |
| USNM             | 277697          | Luzon         | Female     | Wallacea                      |
| USNM             | 289916          | Luzon         | Female     | Wallacea                      |
| USNM             | 348572          | Luzon         | Female     | Wallacea                      |
| USNM             | 348599          | Luzon         | Female     | Wallacea                      |
| USNM             | 348600          | Luzon         | Female     | Wallacea                      |
| USNM             | 348603          | Luzon         | Female     | Wallacea                      |
| USNM             | 348604          | Luzon         | Female     | Wallacea                      |
| USNM             | 348605          | Luzon         | Female     | Wallacea                      |
| USNM             | 348607          | Luzon         | Female     | Wallacea                      |
| USNM             | 348608          | Luzon         | Female     | Wallacea                      |
| USNM             | 348609          | Luzon         | Female     | Wallacea                      |
| USNM             | 348612          | Luzon         | Female     | Wallacea                      |
| USNM             | 348614          | Luzon         | Female     | Wallacea                      |
| USNM             | 348618          | Luzon         | Female     | Wallacea                      |
| USNM             | 348621          | Luzon         | Female     | Wallacea                      |
| USNM             | 348622          | Luzon         | Female     | Wallacea                      |
| USNM             | 348624          | Luzon         | Female     | Wallacea                      |
| USNM             | 348626          | Luzon         | Female     | Wallacea                      |
| USNM             | 145806          | Luzon         | Female     | Wallacea                      |
| USNM             | 145811          | Luzon         | Female     | Wallacea                      |
| USNM             | 145814          | Luzon         | Female     | Wallacea                      |
| USNM             | 145818          | Luzon         | Female     | Wallacea                      |
| USNM             | 145819          | Luzon         | Female     | Wallacea                      |
| USNM             | 145820          | Luzon         | Female     | Wallacea                      |
| USNM             | 145821          | Luzon         | Female     | Wallacea                      |
| USNM             | 145822          | Luzon         | Female     | Wallacea                      |
| USNM             | 145826          | Luzon         | Female     | Wallacea                      |
| USNM             | 145827          | Luzon         | Female     | Wallacea                      |
| USNM             | 145828          | Luzon         | Female     | Wallacea                      |
| USNM             | 145829          | Luzon         | Female     | Wallacea                      |
| USNM             | 145830          | Luzon         | Female     | Wallacea                      |
| USNM             | 145832          | Luzon         | Female     | Wallacea                      |
| USNM             | 145834          | Luzon         | Female     | Wallacea                      |
| USNM             | 145836          | Luzon         | Female     | Wallacea                      |
| USNM             | 145837          | Luzon         | Female     | Wallacea                      |
| USNM             | 145841          | Luzon         | Female     | Wallacea                      |
| USNM             | 145842          | Luzon         | Female     | Wallacea                      |
| USNM             | 145843          | Luzon         | Female     | Wallacea                      |
| USNM             | 145846          | Luzon         | Female     | Wallacea                      |
| USNM             | 151491          | Luzon         | Female     | Wallacea                      |
| USNM             | 151492          | Luzon         | Female     | Wallacea                      |
| USNM             | 151497          | Luzon         | Female     | Wallacea                      |
| USNM             | 151498          | Luzon         | Female     | Wallacea                      |
| USNM             | 151499          | Luzon         | Female     | Wallacea                      |
| USNM             | 277903          | Luzon         | Female     | Wallacea                      |
| USNM             | 277904          | Luzon         | Female     | Wallacea                      |
| USNM             | 277905          | Luzon         | Female     | Wallacea                      |
| USNM             | 277906          | Luzon         | Female     | Wallacea                      |
| USNM             | 277908          | Luzon         | Female     | Wallacea                      |
| USNM             | 277699          | Luzon         | Female     | Wallacea                      |
| USNM             | 278014          | Luzon         | Female     | Wallacea                      |
| USNM             | 278015          | Luzon         | Female     | Wallacea                      |
| USNM             | 278017          | Luzon         | Female     | Wallacea                      |
| USNM             | 278018          | Luzon         | Female     | Wallacea                      |
| USNM             | 278458          | Luzon         | Female     | Wallacea                      |

| <b>Institute</b> | <b>Specimen</b> | <b>Island</b> | <b>Sex</b> | <b>Biogeographical region</b> |
|------------------|-----------------|---------------|------------|-------------------------------|
| USNM             | 278459          | Luzon         | Female     | Wallacea                      |
| USNM             | 278461          | Luzon         | Female     | Wallacea                      |
| USNM             | 278462          | Luzon         | Female     | Wallacea                      |
| USNM             | 278463          | Luzon         | Female     | Wallacea                      |
| USNM             | 279096          | Luzon         | Female     | Wallacea                      |
| USNM             | 279097          | Luzon         | Female     | Wallacea                      |
| USNM             | 279098          | Luzon         | Female     | Wallacea                      |
| USNM             | 278570          | Luzon         | Female     | Wallacea                      |
| USNM             | 278577          | Luzon         | Female     | Wallacea                      |
| USNM             | 278580          | Luzon         | Female     | Wallacea                      |
| USNM             | 278582          | Luzon         | Female     | Wallacea                      |
| USNM             | 278583          | Luzon         | Female     | Wallacea                      |
| USNM             | 278625          | Luzon         | Female     | Wallacea                      |
| USNM             | 278626          | Luzon         | Female     | Wallacea                      |
| USNM             | 279078          | Luzon         | Female     | Wallacea                      |
| USNM             | 279081          | Luzon         | Female     | Wallacea                      |
| USNM             | 279083          | Luzon         | Female     | Wallacea                      |
| USNM             | 279085          | Luzon         | Female     | Wallacea                      |
| USNM             | 279086          | Luzon         | Female     | Wallacea                      |
| USNM             | 279088          | Luzon         | Female     | Wallacea                      |
| USNM             | 279089          | Luzon         | Female     | Wallacea                      |
| USNM             | 279090          | Luzon         | Female     | Wallacea                      |
| USNM             | 261171          | Luzon         | Female     | Wallacea                      |
| USNM             | 261172          | Luzon         | Female     | Wallacea                      |
| USNM             | 304296          | Luzon         | Female     | Wallacea                      |
| USNM             | 287427          | Luzon         | Female     | Wallacea                      |
| USNM             | 287428          | Luzon         | Female     | Wallacea                      |
| USNM             | 278154          | Luzon         | Female     | Wallacea                      |
| USNM             | 279608          | Luzon         | Female     | Wallacea                      |
| USNM             | 279609          | Luzon         | Female     | Wallacea                      |
| USNM             | 279610          | Luzon         | Female     | Wallacea                      |
| USNM             | 356633          | Luzon         | Female     | Wallacea                      |
| USNM             | 356634          | Luzon         | Female     | Wallacea                      |
| USNM             | 356635          | Luzon         | Female     | Wallacea                      |
| USNM             | 356637          | Luzon         | Female     | Wallacea                      |
| USNM             | 356640          | Luzon         | Female     | Wallacea                      |
| USNM             | 356641          | Luzon         | Female     | Wallacea                      |
| USNM             | 283840          | Luzon         | Female     | Wallacea                      |
| USNM             | 283842          | Luzon         | Female     | Wallacea                      |
| USNM             | 348576          | Luzon         | Female     | Wallacea                      |
| USNM             | 348577          | Luzon         | Female     | Wallacea                      |
| USNM             | 348623          | Luzon         | Female     | Wallacea                      |
| USNM             | 536767          | Luzon         | Female     | Wallacea                      |
| USNM             | 277703          | Luzon         | Male       | Wallacea                      |
| USNM             | 144600          | Luzon         | Male       | Wallacea                      |
| USNM             | 145771          | Luzon         | Male       | Wallacea                      |
| USNM             | 348573          | Luzon         | Male       | Wallacea                      |
| USNM             | 348574          | Luzon         | Male       | Wallacea                      |
| USNM             | 348579          | Luzon         | Male       | Wallacea                      |
| USNM             | 348601          | Luzon         | Male       | Wallacea                      |
| USNM             | 348606          | Luzon         | Male       | Wallacea                      |
| USNM             | 348610          | Luzon         | Male       | Wallacea                      |
| USNM             | 348611          | Luzon         | Male       | Wallacea                      |
| USNM             | 348613          | Luzon         | Male       | Wallacea                      |
| USNM             | 348615          | Luzon         | Male       | Wallacea                      |
| USNM             | 348616          | Luzon         | Male       | Wallacea                      |
| USNM             | 348617          | Luzon         | Male       | Wallacea                      |
| USNM             | 348620          | Luzon         | Male       | Wallacea                      |
| USNM             | 348625          | Luzon         | Male       | Wallacea                      |
| USNM             | 145804          | Luzon         | Male       | Wallacea                      |
| USNM             | 145805          | Luzon         | Male       | Wallacea                      |
| USNM             | 145807          | Luzon         | Male       | Wallacea                      |
| USNM             | 145812          | Luzon         | Male       | Wallacea                      |
| USNM             | 145813          | Luzon         | Male       | Wallacea                      |
| USNM             | 145815          | Luzon         | Male       | Wallacea                      |
| USNM             | 145816          | Luzon         | Male       | Wallacea                      |

| <b>Institute</b> | <b>Specimen</b> | <b>Island</b> | <b>Sex</b> | <b>Biogeographical region</b> |
|------------------|-----------------|---------------|------------|-------------------------------|
| USNM             | 145817          | Luzon         | Male       | Wallacea                      |
| USNM             | 145823          | Luzon         | Male       | Wallacea                      |
| USNM             | 145824          | Luzon         | Male       | Wallacea                      |
| USNM             | 145831          | Luzon         | Male       | Wallacea                      |
| USNM             | 145835          | Luzon         | Male       | Wallacea                      |
| USNM             | 145838          | Luzon         | Male       | Wallacea                      |
| USNM             | 145839          | Luzon         | Male       | Wallacea                      |
| USNM             | 145840          | Luzon         | Male       | Wallacea                      |
| USNM             | 145844          | Luzon         | Male       | Wallacea                      |
| USNM             | 145845          | Luzon         | Male       | Wallacea                      |
| USNM             | 145849          | Luzon         | Male       | Wallacea                      |
| USNM             | 145850          | Luzon         | Male       | Wallacea                      |
| USNM             | 151493          | Luzon         | Male       | Wallacea                      |
| USNM             | 151494          | Luzon         | Male       | Wallacea                      |
| USNM             | 151495          | Luzon         | Male       | Wallacea                      |
| USNM             | 277695          | Luzon         | Male       | Wallacea                      |
| USNM             | 277907          | Luzon         | Male       | Wallacea                      |
| USNM             | 277698          | Luzon         | Male       | Wallacea                      |
| USNM             | 277700          | Luzon         | Male       | Wallacea                      |
| USNM             | 277701          | Luzon         | Male       | Wallacea                      |
| USNM             | 278010          | Luzon         | Male       | Wallacea                      |
| USNM             | 278011          | Luzon         | Male       | Wallacea                      |
| USNM             | 278012          | Luzon         | Male       | Wallacea                      |
| USNM             | 278013          | Luzon         | Male       | Wallacea                      |
| USNM             | 278016          | Luzon         | Male       | Wallacea                      |
| USNM             | 278460          | Luzon         | Male       | Wallacea                      |
| USNM             | 278464          | Luzon         | Male       | Wallacea                      |
| USNM             | 278564          | Luzon         | Male       | Wallacea                      |
| USNM             | 278565          | Luzon         | Male       | Wallacea                      |
| USNM             | 278566          | Luzon         | Male       | Wallacea                      |
| USNM             | 278567          | Luzon         | Male       | Wallacea                      |
| USNM             | 278568          | Luzon         | Male       | Wallacea                      |
| USNM             | 279099          | Luzon         | Male       | Wallacea                      |
| USNM             | 279100          | Luzon         | Male       | Wallacea                      |
| USNM             | 279101          | Luzon         | Male       | Wallacea                      |
| USNM             | 278569          | Luzon         | Male       | Wallacea                      |
| USNM             | 278575          | Luzon         | Male       | Wallacea                      |
| USNM             | 278578          | Luzon         | Male       | Wallacea                      |
| USNM             | 278579          | Luzon         | Male       | Wallacea                      |
| USNM             | 278581          | Luzon         | Male       | Wallacea                      |
| USNM             | 278624          | Luzon         | Male       | Wallacea                      |
| USNM             | 279079          | Luzon         | Male       | Wallacea                      |
| USNM             | 279080          | Luzon         | Male       | Wallacea                      |
| USNM             | 279082          | Luzon         | Male       | Wallacea                      |
| USNM             | 279084          | Luzon         | Male       | Wallacea                      |
| USNM             | 279087          | Luzon         | Male       | Wallacea                      |
| USNM             | 279091          | Luzon         | Male       | Wallacea                      |
| USNM             | 279092          | Luzon         | Male       | Wallacea                      |
| USNM             | 279093          | Luzon         | Male       | Wallacea                      |
| USNM             | 279094          | Luzon         | Male       | Wallacea                      |
| USNM             | 279095          | Luzon         | Male       | Wallacea                      |
| USNM             | 261173          | Luzon         | Male       | Wallacea                      |
| USNM             | 261174          | Luzon         | Male       | Wallacea                      |
| USNM             | 261175          | Luzon         | Male       | Wallacea                      |
| USNM             | 261179          | Luzon         | Male       | Wallacea                      |
| USNM             | 287426          | Luzon         | Male       | Wallacea                      |
| USNM             | 304293          | Luzon         | Male       | Wallacea                      |
| USNM             | 304294          | Luzon         | Male       | Wallacea                      |
| USNM             | 304295          | Luzon         | Male       | Wallacea                      |
| USNM             | 304297          | Luzon         | Male       | Wallacea                      |
| USNM             | 304298          | Luzon         | Male       | Wallacea                      |
| USNM             | 304299          | Luzon         | Male       | Wallacea                      |
| USNM             | 304300          | Luzon         | Male       | Wallacea                      |
| USNM             | 278153          | Luzon         | Male       | Wallacea                      |
| USNM             | 279607          | Luzon         | Male       | Wallacea                      |
| USNM             | 356636          | Luzon         | Male       | Wallacea                      |

| <b>Institute</b> | <b>Specimen</b> | <b>Island</b> | <b>Sex</b> | <b>Biogeographical region</b> |
|------------------|-----------------|---------------|------------|-------------------------------|
| USNM             | 356639          | Luzon         | Male       | Wallacea                      |
| USNM             | 356642          | Luzon         | Male       | Wallacea                      |
| USNM             | 283837          | Luzon         | Male       | Wallacea                      |
| USNM             | 283838          | Luzon         | Male       | Wallacea                      |
| USNM             | 283839          | Luzon         | Male       | Wallacea                      |
| USNM             | 283841          | Luzon         | Male       | Wallacea                      |
| USNM             | 145833          | Luzon         | Male       | Wallacea                      |
| USNM             | 348575          | Luzon         | Male       | Wallacea                      |
| USNM             | 348578          | Luzon         | Male       | Wallacea                      |
| USNM             | 348580          | Luzon         | Male       | Wallacea                      |
| USNM             | 348627          | Luzon         | Male       | Wallacea                      |
| USNM             | 348628          | Luzon         | Male       | Wallacea                      |
| USNM             | 277690          | Luzon         | Unknown    | Wallacea                      |
| USNM             | 174861          | Luzon         | Unknown    | Wallacea                      |
| USNM             | 174862          | Luzon         | Unknown    | Wallacea                      |
| USNM             | 277691          | Luzon         | Unknown    | Wallacea                      |
| USNM             | 277693          | Luzon         | Unknown    | Wallacea                      |
| USNM             | 277694          | Luzon         | Unknown    | Wallacea                      |
| USNM             | 277696          | Luzon         | Unknown    | Wallacea                      |
| USNM             | 277702          | Luzon         | Unknown    | Wallacea                      |
| USNM             | 287425          | Luzon         | Unknown    | Wallacea                      |
| USNM             | 143636          | Mindanao      | Adult      | Wallacea                      |
| USNM             | 143635          | Mindanao      | Female     | Wallacea                      |
| USNM             | 145769          | Mindanao      | Female     | Wallacea                      |
| USNM             | 145773          | Mindanao      | Female     | Wallacea                      |
| USNM             | 145780          | Mindanao      | Female     | Wallacea                      |
| USNM             | 145781          | Mindanao      | Female     | Wallacea                      |
| USNM             | 145782          | Mindanao      | Female     | Wallacea                      |
| USNM             | 145787          | Mindanao      | Female     | Wallacea                      |
| USNM             | 125218          | Mindanao      | Female     | Wallacea                      |
| USNM             | 125220          | Mindanao      | Female     | Wallacea                      |
| USNM             | 125221          | Mindanao      | Female     | Wallacea                      |
| USNM             | 125222          | Mindanao      | Female     | Wallacea                      |
| USNM             | 144613          | Mindanao      | Female     | Wallacea                      |
| USNM             | 125223          | Mindanao      | Female     | Wallacea                      |
| USNM             | 123294          | Mindanao      | Female     | Wallacea                      |
| USNM             | 125216          | Mindanao      | Female     | Wallacea                      |
| USNM             | 125224          | Mindanao      | Female     | Wallacea                      |
| USNM             | 462219          | Mindanao      | Female     | Wallacea                      |
| USNM             | 462220          | Mindanao      | Female     | Wallacea                      |
| USNM             | 462221          | Mindanao      | Female     | Wallacea                      |
| USNM             | 462222          | Mindanao      | Female     | Wallacea                      |
| USNM             | 462223          | Mindanao      | Female     | Wallacea                      |
| USNM             | 462224          | Mindanao      | Female     | Wallacea                      |
| USNM             | 125229          | Mindanao      | Female     | Wallacea                      |
| USNM             | 145778          | Mindanao      | Male       | Wallacea                      |
| USNM             | 145775          | Mindanao      | Male       | Wallacea                      |
| USNM             | 261168          | Mindanao      | Male       | Wallacea                      |
| USNM             | 261169          | Mindanao      | Male       | Wallacea                      |
| USNM             | 125219          | Mindanao      | Male       | Wallacea                      |
| USNM             | 144614          | Mindanao      | Male       | Wallacea                      |
| USNM             | 261176          | Mindanao      | Male       | Wallacea                      |
| USNM             | 462209          | Mindanao      | Male       | Wallacea                      |
| USNM             | 462214          | Mindanao      | Male       | Wallacea                      |
| USNM             | 462215          | Mindanao      | Male       | Wallacea                      |
| USNM             | 462216          | Mindanao      | Male       | Wallacea                      |
| USNM             | 462217          | Mindanao      | Male       | Wallacea                      |
| USNM             | 462218          | Mindanao      | Male       | Wallacea                      |
| USNM             | 125225          | Mindanao      | Male       | Wallacea                      |
| USNM             | 125227          | Mindanao      | Male       | Wallacea                      |
| USNM             | 145786          | Mindanao      | Unknown    | Wallacea                      |
| USNM             | 145791          | Mindanao      | Unknown    | Wallacea                      |
| USNM             | 145785          | Mindanao      | Unknown    | Wallacea                      |
| USNM             | 277633          | Mindoro       | Female     | Wallacea                      |
| USNM             | 144960          | Mindoro       | Female     | Wallacea                      |
| USNM             | 348602          | Mindoro       | Female     | Wallacea                      |

| <b>Institute</b> | <b>Specimen</b> | <b>Island</b> | <b>Sex</b> | <b>Biogeographical region</b> |
|------------------|-----------------|---------------|------------|-------------------------------|
| USNM             | 277656          | Mindoro       | Female     | Wallacea                      |
| USNM             | 277658          | Mindoro       | Female     | Wallacea                      |
| USNM             | 277659          | Mindoro       | Female     | Wallacea                      |
| USNM             | 277660          | Mindoro       | Female     | Wallacea                      |
| USNM             | 278587          | Mindoro       | Female     | Wallacea                      |
| USNM             | 278590          | Mindoro       | Female     | Wallacea                      |
| USNM             | 278594          | Mindoro       | Female     | Wallacea                      |
| USNM             | 283844          | Mindoro       | Female     | Wallacea                      |
| USNM             | 277585          | Mindoro       | Female     | Wallacea                      |
| USNM             | 277586          | Mindoro       | Female     | Wallacea                      |
| USNM             | 277640          | Mindoro       | Female     | Wallacea                      |
| USNM             | 277643          | Mindoro       | Female     | Wallacea                      |
| USNM             | 277645          | Mindoro       | Female     | Wallacea                      |
| USNM             | 277646          | Mindoro       | Female     | Wallacea                      |
| USNM             | 277647          | Mindoro       | Female     | Wallacea                      |
| USNM             | 277650          | Mindoro       | Female     | Wallacea                      |
| USNM             | 277655          | Mindoro       | Female     | Wallacea                      |
| USNM             | 144638          | Mindoro       | Male       | Wallacea                      |
| USNM             | 144961          | Mindoro       | Male       | Wallacea                      |
| USNM             | 277657          | Mindoro       | Male       | Wallacea                      |
| USNM             | 278585          | Mindoro       | Male       | Wallacea                      |
| USNM             | 278586          | Mindoro       | Male       | Wallacea                      |
| USNM             | 278589          | Mindoro       | Male       | Wallacea                      |
| USNM             | 278591          | Mindoro       | Male       | Wallacea                      |
| USNM             | 278593          | Mindoro       | Male       | Wallacea                      |
| USNM             | 283843          | Mindoro       | Male       | Wallacea                      |
| USNM             | 144639          | Mindoro       | Male       | Wallacea                      |
| USNM             | 277583          | Mindoro       | Male       | Wallacea                      |
| USNM             | 277584          | Mindoro       | Male       | Wallacea                      |
| USNM             | 277641          | Mindoro       | Male       | Wallacea                      |
| USNM             | 277642          | Mindoro       | Male       | Wallacea                      |
| USNM             | 277644          | Mindoro       | Male       | Wallacea                      |
| USNM             | 277648          | Mindoro       | Male       | Wallacea                      |
| USNM             | 277649          | Mindoro       | Male       | Wallacea                      |
| USNM             | 277651          | Mindoro       | Male       | Wallacea                      |
| USNM             | 277652          | Mindoro       | Male       | Wallacea                      |
| USNM             | 277653          | Mindoro       | Male       | Wallacea                      |
| USNM             | 277654          | Mindoro       | Male       | Wallacea                      |
| USNM             | 144637          | Mindoro       | Male       | Wallacea                      |
| USNM             | 277554          | Mindoro       | Unknown    | Wallacea                      |
| USNM             | 277555          | Mindoro       | Unknown    | Wallacea                      |
| USNM             | 458832          | Negros        | Female     | Wallacea                      |
| USNM             | 458834          | Negros        | Female     | Wallacea                      |
| USNM             | 458837          | Negros        | Female     | Wallacea                      |
| USNM             | 458841          | Negros        | Female     | Wallacea                      |
| USNM             | 458825          | Negros        | Female     | Wallacea                      |
| USNM             | 458828          | Negros        | Female     | Wallacea                      |
| USNM             | 458842          | Negros        | Male       | Wallacea                      |
| USNM             | 458835          | Negros        | Male       | Wallacea                      |
| USNM             | 458836          | Negros        | Male       | Wallacea                      |
| USNM             | 458839          | Negros        | Male       | Wallacea                      |
| USNM             | 458840          | Negros        | Male       | Wallacea                      |
| USNM             | 458843          | Negros        | Male       | Wallacea                      |
| USNM             | 458826          | Negros        | Male       | Wallacea                      |
| USNM             | 458827          | Negros        | Male       | Wallacea                      |
| USNM             | 458829          | Negros        | Male       | Wallacea                      |
| USNM             | 458831          | Negros        | Male       | Wallacea                      |
| USNM             | 458833          | Negros        | Male       | Wallacea                      |
| USNM             | 458838          | Negros        | Male       | Wallacea                      |
| USNM             | 458844          | Negros        | Male       | Wallacea                      |
| USNM             | 239244          | Negros        | Unknown    | Wallacea                      |
| USNM             | 239243          | Negros        | Unknown    | Wallacea                      |
| USNM             | 261165          | Panay         | Female     | Wallacea                      |
| USNM             | 261167          | Panay         | Female     | Wallacea                      |
| USNM             | 261181          | Panay         | Female     | Wallacea                      |
| USNM             | 261180          | Panay         | Female     | Wallacea                      |

| <b>Institute</b> | <b>Specimen</b> | <b>Island</b> | <b>Sex</b> | <b>Biogeographical region</b> |
|------------------|-----------------|---------------|------------|-------------------------------|
| USNM             | 261166          | Panay         | Male       | Wallacea                      |
| USNM             | 278131          | Samar         | Female     | Wallacea                      |
| USNM             | 278132          | Samar         | Female     | Wallacea                      |
| USNM             | 278136          | Samar         | Female     | Wallacea                      |
| USNM             | 278137          | Samar         | Female     | Wallacea                      |
| USNM             | 278130          | Samar         | Male       | Wallacea                      |
| USNM             | 278133          | Samar         | Male       | Wallacea                      |
| USNM             | 278134          | Samar         | Male       | Wallacea                      |
| USNM             | 278135          | Samar         | Male       | Wallacea                      |
| USNM             | 199927          | Sulawesi      | Male       | Wallacea                      |

| <b>Institute</b> | <b>Specimen</b> | <b>Island</b>           | <b>Sex</b> | <b>Biogeographical region</b> |
|------------------|-----------------|-------------------------|------------|-------------------------------|
| NMNZ             | 337             | Cuvier Island (Repanga) | male       | Polynesia                     |
| NMNZ             | 338             | Cuvier Island (Repanga) | male       | Polynesia                     |
| NMNZ             | 339             | Cuvier Island (Repanga) | male       | Polynesia                     |
| NMNZ             | 340             | Cuvier Island (Repanga) | female     | Polynesia                     |
| NMNZ             | 341             | Cuvier Island (Repanga) | male       | Polynesia                     |
| NMNZ             | 342             | Cuvier Island (Repanga) | female     | Polynesia                     |
| NMNZ             | n.n.            | Cuvier Island (Repanga) | male       | Polynesia                     |
| NMNZ             | AED119          | Hen Island              | male       | Polynesia                     |
| NMNZ             | AED375          | Hen Island              | male       | Polynesia                     |
| NMNZ             | AED376          | Hen Island              | female     | Polynesia                     |
| NMNZ             | AED377          | Hen Island              | male       | Polynesia                     |
| NMNZ             | AED205          | Little Barrier          | male       | Polynesia                     |
| NMNZ             | AED238          | Little Barrier          | female     | Polynesia                     |
| NMNZ             | AED241          | Little Barrier          | male       | Polynesia                     |
| NMNZ             | AED490          | Little Barrier          | male       | Polynesia                     |
| NMNZ             | AED491          | Little Barrier          | female     | Polynesia                     |
| NMNZ             | AED492          | Little Barrier          | female     | Polynesia                     |
| NMNZ             | AED493          | Little Barrier          | male       | Polynesia                     |
| NMNZ             | AED494          | Little Barrier          | male       | Polynesia                     |
| NMNZ             | AED495          | Little Barrier          | female     | Polynesia                     |
| NMNZ             | AED496          | Little Barrier          | male       | Polynesia                     |
| NMNZ             | AED497          | Little Barrier          | female     | Polynesia                     |
| NMNZ             | AED498          | Little Barrier          | male       | Polynesia                     |
| NMNZ             | AED499          | Little Barrier          | female     | Polynesia                     |
| NMNZ             | AED501          | Little Barrier          | female     | Polynesia                     |
| NMNZ             | LB5             | Little Barrier          | male       | Polynesia                     |
| NMNZ             | LB11            | Little Barrier          | male       | Polynesia                     |
| NMNZ             | LB22            | Little Barrier          | female     | Polynesia                     |
| NMNZ             | LB43            | Little Barrier          | female     | Polynesia                     |
| NMNZ             | LB17            | Little Barrier          | female     | Polynesia                     |
| NMNZ             | LB19            | Little Barrier          | male       | Polynesia                     |
| NMNZ             | LB24            | Little Barrier          | male       | Polynesia                     |
| NMNZ             | LB25            | Little Barrier          | female     | Polynesia                     |
| NMNZ             | LB30            | Little Barrier          | male       | Polynesia                     |
| NMNZ             | LB31            | Little Barrier          | female     | Polynesia                     |
| NMNZ             | LB32            | Little Barrier          | female     | Polynesia                     |
| NMNZ             | LB33            | Little Barrier          | male       | Polynesia                     |
| NMNZ             | LB39            | Little Barrier          | female     | Polynesia                     |
| NMNZ             | LB40            | Little Barrier          | male       | Polynesia                     |
| NMNZ             | LB41            | Little Barrier          | female     | Polynesia                     |
| NMNZ             | LB44            | Little Barrier          | female     | Polynesia                     |
| NMNZ             | LB45            | Little Barrier          | female     | Polynesia                     |
| NMNZ             | LB52            | Little Barrier          | female     | Polynesia                     |
| NMNZ             | LB53            | Little Barrier          | male       | Polynesia                     |
| NMNZ             | LB54            | Little Barrier          | male       | Polynesia                     |
| NMNZ             | LB55            | Little Barrier          | male       | Polynesia                     |
| NMNZ             | E2              | Macauley Island         | male       | Polynesia                     |
| NMNZ             | E3              | Macauley Island         | female     | Polynesia                     |
| NMNZ             | AED469          | Pitcairn                | male       | Polynesia                     |
| NMNZ             | AED466          | Pitcairn                | male       | Polynesia                     |
| NMNZ             | AED467          | Pitcairn                | N/A        | Polynesia                     |
| NMNZ             | AED468          | Pitcairn                | male       | Polynesia                     |
| NMNZ             | LM142           | Raoul Island            | female     | Polynesia                     |
| NMNZ             | LM146           | Raoul Island            | female     | Polynesia                     |
| NMNZ             | LM764           | Raoul Island            | female     | Polynesia                     |
| NMNZ             | LM765           | Raoul Island            | N/A        | Polynesia                     |
| NMNZ             | LM766           | Raoul Island            | male       | Polynesia                     |
| NMNZ             | LM767           | Raoul Island            | female     | Polynesia                     |
| NMNZ             | LM768           | Raoul Island            | female     | Polynesia                     |
| NMNZ             | LM772           | Raoul Island            | female     | Polynesia                     |
| NMNZ             | LM773           | Raoul Island            | male       | Polynesia                     |
| NMNZ             | 214             | Rurima Rocks            | N/A        | Polynesia                     |
| NMNZ             | 215             | Rurima Rocks            | N/A        | Polynesia                     |
| NMNZ             | 216             | Rurima Rocks            | N/A        | Polynesia                     |
| NMNZ             | 217             | Rurima Rocks            | N/A        | Polynesia                     |
| NMNZ             | AED463          | South Island            | male       | Polynesia                     |

| Institute | Specimen | Island       | Sex    | Biogeographical region |                                  |
|-----------|----------|--------------|--------|------------------------|----------------------------------|
| NMNZ      | AED464   | South Island | male   | Polynesia              |                                  |
| NMNZ      | AED465   | South Island | female | Polynesia              |                                  |
| NMNZ      | LM770    | South Island | N/A    | Polynesia              |                                  |
| NMNZ      | LM769    | South Island | N/A    | Polynesia              |                                  |
| NMNZ      | LM771    | South Island | N/A    | Polynesia              | dorsal pelage only               |
| NMNZ      | 198      | Stewart      | male   | Polynesia              |                                  |
| NMNZ      | E4       | Stewart      | male   | Polynesia              |                                  |
| NMNZ      | 1        | North Island | N/A    | Polynesia              | first sac                        |
| NMNZ      | 2        | North Island | N/A    | Polynesia              | first sac                        |
| NMNZ      | 3        | North Island | N/A    | Polynesia              | first sac                        |
| NMNZ      | 4        | North Island | N/A    | Polynesia              | first sac                        |
| NMNZ      | 5        | North Island | N/A    | Polynesia              | first sac                        |
| NMNZ      | 20       | North Island | N/A    | Polynesia              | first sac                        |
| NMNZ      | 36       | North Island | N/A    | Polynesia              | first sac                        |
| NMNZ      | 40       | North Island | N/A    | Polynesia              | first sac                        |
| NMNZ      | 52       | North Island | N/A    | Polynesia              | first sac                        |
| NMNZ      | 82       | North Island | N/A    | Polynesia              | first sac                        |
| NMNZ      | 83       | North Island | N/A    | Polynesia              | first sac                        |
| NMNZ      | 84 (1)   | North Island | N/A    | Polynesia              | first sac                        |
| NMNZ      | 84 (2)   | North Island | N/A    | Polynesia              | first sac                        |
| NMNZ      | 85       | North Island | N/A    | Polynesia              | first sac                        |
| NMNZ      | 86       | North Island | N/A    | Polynesia              | first sac                        |
| NMNZ      | 87       | North Island | N/A    | Polynesia              | first sac                        |
| NMNZ      | 88       | North Island | N/A    | Polynesia              | first sac                        |
| NMNZ      | 90       | North Island | N/A    | Polynesia              | first sac                        |
| NMNZ      | 92       | North Island | N/A    | Polynesia              | first sac                        |
| NMNZ      | 93       | North Island | N/A    | Polynesia              | first sac                        |
| NMNZ      | 97       | North Island | N/A    | Polynesia              | first sac                        |
| NMNZ      | 110      | North Island | N/A    | Polynesia              | first sac                        |
| NMNZ      | 112      | North Island | N/A    | Polynesia              | first sac                        |
| NMNZ      | 116      | North Island | N/A    | Polynesia              | first sac                        |
| NMNZ      | 85       | North Island | N/A    | Polynesia              | second bag (with Nive)           |
| NMNZ      | 89       | North Island | N/A    | Polynesia              | second bag (with Nive)           |
| NMNZ      | 91       | North Island | N/A    | Polynesia              | second bag (with Nive)           |
| NMNZ      | 107      | North Island | N/A    | Polynesia              | second bag (with Nive)           |
| NMNZ      | 1        | North Island | male   | Polynesia              | third bag ("1974")               |
| NMNZ      | 4        | North Island | female | Polynesia              | third bag ("1974")               |
| NMNZ      | 8        | North Island | female | Polynesia              | third bag ("1974")               |
| NMNZ      | 21       | North Island | male   | Polynesia              | third bag ("1974")               |
| NMNZ      | 24       | North Island | female | Polynesia              | third bag ("1974")               |
| NMNZ      | 25       | North Island | male   | Polynesia              | third bag ("1974")               |
| NMNZ      | 26       | North Island | female | Polynesia              | third bag ("1974")               |
| NMNZ      | 27       | North Island | female | Polynesia              | third bag ("1974")               |
| NMNZ      | 28       | North Island | female | Polynesia              | third bag ("1974")               |
| NMNZ      | 70       | North Island | male   | Polynesia              | fourth bag (first specimen 1977) |
| NMNZ      | 73       | North Island | male   | Polynesia              | fourth bag (first specimen 1977) |
| NMNZ      | 34       | North Island | male   | Polynesia              | sac LM 863                       |
| NMNZ      | 34       | North Island | male   | Polynesia              | sac LM 863                       |
| NMNZ      | 40       | North Island | N/A    | Polynesia              | sac LM 863                       |
| NMNZ      | 40       | North Island | N/A    | Polynesia              | sac LM 863                       |
| NMNZ      | 41       | North Island | N/A    | Polynesia              | sac LM 863                       |
| NMNZ      | 41       | North Island | N/A    | Polynesia              | sac LM 863                       |
| NMNZ      | 42       | North Island | N/A    | Polynesia              | sac LM 863                       |
| NMNZ      | 42       | North Island | N/A    | Polynesia              | sac LM 863                       |
| NMNZ      | 43       | North Island | N/A    | Polynesia              | sac LM 863                       |
| NMNZ      | 43       | North Island | N/A    | Polynesia              | sac LM 863                       |
| NMNZ      | 44       | North Island | N/A    | Polynesia              | sac LM 863                       |
| NMNZ      | 44       | North Island | N/A    | Polynesia              | sac LM 863                       |
| NMNZ      | 45       | North Island | N/A    | Polynesia              | sac LM 863                       |
| NMNZ      | 46       | North Island | N/A    | Polynesia              | sac LM 863                       |
| NMNZ      | 48       | North Island | N/A    | Polynesia              | sac LM 863                       |
| NMNZ      | 48       | North Island | N/A    | Polynesia              | sac LM 863                       |
| NMNZ      | 49       | North Island | N/A    | Polynesia              | sac LM 863                       |
| NMNZ      | 49       | North Island | N/A    | Polynesia              | sac LM 863                       |
| NMNZ      | 50       | North Island | N/A    | Polynesia              | sac LM 863                       |
| NMNZ      | 51       | North Island | N/A    | Polynesia              | sac LM 863                       |



| <b>Institute</b> | <b>Specimen</b> | <b>Island</b>           | <b>Sex</b> | <b>Biogeographical region</b> |                    |
|------------------|-----------------|-------------------------|------------|-------------------------------|--------------------|
| NMNZ             | 52              | North Island            | N/A        | Polynesia                     | sac LM 863         |
| NMNZ             | 52              | North Island            | N/A        | Polynesia                     | sac LM 863         |
| NMNZ             | 55              | North Island            | N/A        | Polynesia                     | sac LM 863         |
| NMNZ             | 55              | North Island            | N/A        | Polynesia                     | sac LM 863         |
| NMNZ             | 57              | North Island            | N/A        | Polynesia                     | sac LM 863         |
| NMNZ             | 59              | North Island            | N/A        | Polynesia                     | sac LM 863         |
| NMNZ             | 60 (1)          | North Island            | N/A        | Polynesia                     | sac LM 863         |
| NMNZ             | 60 (2)          | North Island            | N/A        | Polynesia                     | sac LM 863         |
| NMNZ             | 61              | North Island            | N/A        | Polynesia                     | sac LM 863         |
| NMNZ             | 64 (1)          | North Island            | N/A        | Polynesia                     | sac LM 863         |
| NMNZ             | 64 (2)          | North Island            | N/A        | Polynesia                     | sac LM 863         |
| NMNZ             | 65              | North Island            | N/A        | Polynesia                     | sac LM 863         |
| NMNZ             | 66 (1)          | North Island            | N/A        | Polynesia                     | sac LM 863         |
| NMNZ             | 66 (2)          | North Island            | N/A        | Polynesia                     | sac LM 863         |
| NMNZ             | 67 (1)          | North Island            | N/A        | Polynesia                     | sac LM 863         |
| NMNZ             | 67 (2)          | North Island            | N/A        | Polynesia                     | sac LM 863         |
| NMNZ             | 68 (1)          | North Island            | N/A        | Polynesia                     | sac LM 863         |
| NMNZ             | 68 (2)          | North Island            | N/A        | Polynesia                     | sac LM 863         |
| NMNZ             | 69              | North Island            | N/A        | Polynesia                     | sac LM 863         |
| NMNZ             | 71              | North Island            | N/A        | Polynesia                     | sac LM 863         |
| NMNZ             | 72              | North Island            | N/A        | Polynesia                     | sac LM 863         |
| NMNZ             | 73 (1)          | North Island            | N/A        | Polynesia                     | sac LM 863         |
| NMNZ             | 73 (2)          | North Island            | N/A        | Polynesia                     | sac LM 863         |
| NMNZ             | 74              | North Island            | N/A        | Polynesia                     | sac LM 863         |
| NMNZ             | 75              | North Island            | N/A        | Polynesia                     | sac LM 863         |
| NMNZ             | 78              | North Island            | N/A        | Polynesia                     | sac LM 863         |
| NMNZ             | 82              | North Island            | N/A        | Polynesia                     | sac LM 863         |
| NMNZ             | n.n.            | White Island (Whakaari) | N/A        | Polynesia                     | mummified specimen |
| NMNZ             | 117             | White Island (Whakaari) | male       | Polynesia                     |                    |
| NMNZ             | 107             | White Island (Whakaari) | female     | Polynesia                     |                    |
| NMNZ             | 109             | White Island (Whakaari) | female     | Polynesia                     |                    |
| NMNZ             | 110             | White Island (Whakaari) | male       | Polynesia                     |                    |
| NMNZ             | 118             | White Island (Whakaari) | male       | Polynesia                     |                    |
| NMNZ             | 116             | White Island (Whakaari) | male       | Polynesia                     |                    |
| NMNZ             | 762             | White Island (Whakaari) | male       | Polynesia                     |                    |
