# Supplementary material for: Effect of isolation on coat colour polymorphism of Polynesian rats in Island Southeast Asia and the Pacific
Source: PubMed Central journal article supplement (PMC6511229; doi:10.7717/peerj.6894), 2019-05-08
Supplement: peerj-07-6894-s002.pdf [file peerj-07-6894-s002.pdf]

# Effect of isolation on coat colour polymorphism of wild populations of Polynesian rats (*Rattus exulans*) in Island Southeast Asia and the Pacific

Alexandra A.E. van der Geer

Naturalis Biodiversity Center  
Leiden  
the Netherlands

[alexandra.vandergeer@naturalis.nl](mailto:alexandra.vandergeer@naturalis.nl)

## DATA FILE S2

This file contains island features of the studied islands.

### **Explanation of column headers**

PREDATORS: number of ecologically relevant native predators.

COMPETITORS: number of ecologically relevant native competitors.

AREA: island area in km<sup>2</sup>.

TIME CLASS: time in isolation, classified in time bins of 1,000 years.

### **References for TIME CLASS**

- Anderson A. 2005.** Crossing the Luzon Strait: archaeological chronology in the Batanes Islands, Philippines and the regional sequence of Neolithic dispersal. *Journal of Austronesian Studies* **1**:25–44.
- Anderson A. 2008.** Traditionalism, interaction, and long-distance seafaring in Polynesia. *Journal of Island and Coastal Archaeology* **3**:240–250. DOI 10.1080/15564890802340000
- Anderson A., Sinoto Y. 2002.** New radiocarbon dates of colonization sites in East Polynesia. *Asian Perspectives* **41**:242–257.
- Anderson A., White P. 2001.** Prehistoric settlement on Norfolk Island and its Oceanic context. *Records of the Australian Museum, Supplement* **27**:135–141.
- Burley DV, Weisler M, Zhao XJ. 2012.** High precision U/Th dating of first polynesian settlement. *PLoS ONE* **7** (11):e48769. DOI 10.1371/journal.pone.0048769
- Carson MT, Hung H-C, Summerhayes G, Bellwood P. 2013.** The pottery trail from Southeast Asia to Remote Oceania. *Journal of Island and Coastal Archaeology* **8**:17–36. DOI 10.1080/15564894.2012.726941
- Clark JT, Quintus S, Weisler M, St Pierre E, Nothdurft L, Feng Y. 2016.** Refining the chronology for West Polynesian colonization: new data from the Samoan archipelago. *Journal of Archaeological Science Reports* **6**:266–274. DOI 10.1016/j.jasrep.2016.02.011
- Cranbrook Earl of. 2000.** Northern Borneo environments of the past 40,000 years: archaeozoological evidence. *The Sarawak Museum Journal* **55**:61–109.

- Denham T, Ramsey CB, Specht J. 2012.** Dating the appearance of Lapita pottery in the Bismarck Archipelago and its dispersal to Remote Oceania. *Archaeology in Oceania* **47**:39–46. DOI 10.1002/j.1834-4453.2012.tb00113.x
- Green RC, Jones M, Sheppard P. 2008.** The reconstructed environment and absolute dating of SE-SZ-8 Lapita site on Nendö, Santa Cruz, Solomon Islands. *Archaeology in Oceania* **43**:49–61. DOI 10.1002/j.1834-4453.2008.tb00030.x
- Hanebuth TJJ, Voris HK, Yokoyama Y, Saito Y, Okuno JI. 2011.** Formation and fate of sedimentary depocenters on Southeast Asia's Sunda Shelf over the past sea-level cycle and biogeographic implications. *Earth-Science Reviews* **104**:92–110.
- Kirch PV. 1984.** *The Evolution of Polynesian Chiefdoms*. Cambridge, UK: Cambridge University Press.
- McCoy MD, Alerson HA, Hemi R, Cheng H, Lawrence Edwards R. 2016.** Earliest direct evidence of monument building at the archaeological site of Nan Madol (Pohnpei, Micronesia) identified using  $^{230}\text{Th}/\text{U}$  coral dating and geochemical sourcing of megalithic architectural stone. *Quaternary Research* **86**:295–303. DOI 10.1016/j.ygres.2016.08.002
- Summerhayes GR, Leavesley M, Fairbairn A, Mandui H, Field J, Ford A, Fullagar R. 2010.** Human adaptation and plant use in highland New Guinea 49,000 to 44,000 years ago. *Science* **330**:78–81. DOI 10.1126/science.1193130
- West K, Collins C, Kardailsky O, Kahn J, Hunt TL, Burley DV, Matisoo-Smith E. 2017.** The Pacific rat race to Easter Island: tracking the prehistoric dispersal of *Rattus exulans* using ancient mitochondrial genomes. *Frontiers in Ecology and Evolution* **5**:52. DOI 10.3389/fevo.2017.00052
- Wilmshurst JM, Hunt TL, Lipo CP, Anderson AJ. 2011.** High-precision radiocarbon dating shows recent and rapid initial human colonization of East Polynesia. *Proceedings of the National Academy of Sciences of the United States of America* **108**:1815–1820.

| ISLAND          | REGION     | PREDATORS | COMPETITORS | AREA     | TIME CLASS | SOURCE FOR TIME                            |
|-----------------|------------|-----------|-------------|----------|------------|--------------------------------------------|
| Ambon           | Wallacea   | 0         | 0           | 805.8    | 4          | Anderson 2005                              |
| And Atoll       | Micronesia | 0         | 0           | 0.35     | 1          | West et al. 2017                           |
| Arno atoll      | Micronesia | 0         | 0           | 13       | 1          | West et al. 2017                           |
| Atafu           | Polynesia  | 0         | 0           | 2.2      | 2          | Anderson, 2008                             |
| Aunuu           | Polynesia  | 0         | 0           | 1.6      | 3          | Clark et al. 2016                          |
| Babelthuap      | Micronesia | 0         | 0           | 374.1    | 2          | inferred from Pohnpei data                 |
| Balabac         | Sunda      | 1         | 3           | 318.8    | 5          | Hanebuth et al. 2011                       |
| Bali            | Sunda      | 3         | 2           | 5416.4   | 5          | Hanebuth et al. 2011                       |
| Bali Kukup      | Sunda      | N/A       | N/A         | 0.182    | 5          | Hanebuth et al. 2011                       |
| Banka           | Sunda      | N/A       | N/A         | 11413.3  | 5          | Hanebuth et al. 2011                       |
| Basilan         | Wallacea   | 1         | 1           | 1265.5   | 4          | inferred from Luzon                        |
| Batam           | Sunda      | 0         | 0           | 399.1    | 5          | Hanebuth et al. 2011                       |
| Bikar Atoll     | Micronesia | 0         | 0           | 0.5      | 1          | West et al. 2017                           |
| Bikini          | Micronesia | 0         | 0           | 6        | 1          | West et al. 2017                           |
| Birnie          | Polynesia  | 0         | 0           | 0.2      | 1          | inferred from Line Islands                 |
| Borneo          | Sunda      | 15        | 3           | 748168.1 | 5          | Hanebuth et al. 2011                       |
| Bougainville    | Melanesia  | 0         | 3           | 9317.8   | 4          | as Bismarck                                |
| Buru            | Wallacea   | 0         | 0           | 8473.2   | 4          | Anderson 2005                              |
| Busuanga        | Wallacea   | 2         | 3           | 980      | 4          | inferred from Northern Luzon data          |
| Carlos Island   | Micronesia | 0         | 0           | N/A      | N/A        |                                            |
| Catanduanes     | Wallacea   | 0         | 3           | 1522.9   | 4          | inferred from Northern Luzon data          |
| David Island    | Micronesia | 0         | 0           | N/A      | N/A        |                                            |
| Dick Island     | Micronesia | 0         | 0           | N/A      | N/A        |                                            |
| Éfaté           | Outlier    | 0         | 0           | 899.5    | 3          | Kirch (1984)                               |
| Emirau          | Melanesia  | 0         | 0           | 41       | 4          | Green et al. 2008; Summerhayes et al. 2010 |
| Enewetak        | Micronesia | 0         | 0           | 5.8      | 1          | West et al. 2017                           |
| Espiritu Santo  | Melanesia  | 0         | 0           | 3955.5   | 4          | Denham et al. 2012                         |
| Fakaofu         | Polynesia  | 0         | 0           | 2.6      | 2          | Anderson, 2008                             |
| Fergusson       | Melanesia  | 0         | 6           | 1436.7   | 4          | as Bismarck                                |
| Fiji            | Melanesia  | 0         | 0           | 10531    | 3          | Denham et al. 2012                         |
| Goodenough      | Melanesia  | 0         | 4           | 686.7    | 4          | as Bismarck                                |
| Grande Terre    | Melanesia  | 0         | 0           | 16648.4  | 4          | as Bismarck                                |
| Guadalcanal     | Melanesia  | 0         | 3           | 5352.9   | 4          | as Bismarck                                |
| Guam            | Micronesia | 0         | 0           | 541      | 4          | Carson et al. 2013                         |
| Guguan          | Micronesia | 0         | 0           | 4        | 4          | Carson et al. 2013                         |
| Halmahera       | Wallacea   | 0         | 3           | 18039.6  | 4          | Anderson 2005                              |
| Hatutaa         | Polynesia  | 0         | 0           | 18.1     | 1          | Wilmshurst et al., 2011                    |
| Hawaii          | Polynesia  | 0         | 0           | 10435    | 1          | Wilmshurst et al. 2011                     |
| Hen Island      | Polynesia  | 0         | 0           | 4.7      | 1          | Wilmshurst et al. 2011                     |
| Java            | Sunda      | 13        | 5           | 138793.6 | 5          | Hanebuth et al. 2011                       |
| Kalap Island    | Micronesia | 0         | 0           | 1.3      | 2          | inferred from Pohnpei data                 |
| Kanton          | Polynesia  | 0         | 0           | 9.1      | 1          | inferred from Line Islands                 |
| Kapingamarangi  | Outlier    |           | 0           |          | 3          | Kirch (1984)                               |
|                 |            | 0         |             | 1.1      |            |                                            |
| Kauai           | Polynesia  | 0         | 0           | 1434.6   | 1          | Wilmshurst et al. 2011                     |
| Kayangel        | Micronesia | 0         | 0           | 1.7      | 2          | inferred from Pohnpei data                 |
| Kiritimati      | Polynesia  | 0         | 0           | 321      | 1          | Wilmshurst et al., 2011                    |
| Kiriwinia       | Melanesia  | 0         | 0           | 266.5    | 4          | as Bismarck                                |
| Koror           | Micronesia | 0         | 0           | 9.3      | 2          | inferred from Pohnpei data                 |
| Kosrae          | Micronesia | 0         | 0           | 110      | 2          | inferred from Pohnpei data                 |
| Kure Atoll      | Polynesia  | 0         | 0           | 0.77685  | 1          | Wilmshurst et al. 2011                     |
| Kwajalein Atoll | Micronesia | 0         | 0           | 16       | 1          | West et al. 2017                           |
| Leyte           | Wallacea   | 0         | 4           | 7367.6   | 4          | inferred from Northern Luzon data          |
| Little Barrier  | Polynesia  | 0         | 0           | 28       | 1          | Wilmshurst et al. 2011                     |
| Luzon           | Wallacea   | 0         | 40          | 109964.9 | 4          | Anderson 2005                              |
| Macauley        | Polynesia  | 0         | 0           | 3.7      | 1          | Wilmshurst et al. 2011                     |
| Majuro          | Micronesia | 0         | 0           | 9        | 1          | West et al. 2017                           |

|                  |            |     |     |          |     |                                            |
|------------------|------------|-----|-----|----------|-----|--------------------------------------------|
| Malenge          | Wallacea   | N/A | N/A | 13.38    | 4   | inferred from Sulawesi data                |
| Manra Island     | Polynesia  | 0   | 0   | 4.4      | 1   | inferred from Line Islands                 |
| Maui             | Polynesia  | 0   | 0   | 1903.3   | 1   | Wilmshurst et al. 2011                     |
| Mindanao         | Wallacea   | 0   | 13  | 97530    | 4   | inferred from Northern Luzon data          |
| Mindoro          | Wallacea   | 0   | 6   | 10571.8  | 4   | inferred from Northern Luzon data          |
| Misima Island    | Melanesia  | 0   | 0   | 202.5    | 4   | as Bismarck                                |
| Moen Island      | Micronesia | 0   | 0   | 18.8     | 2   | inferred from Pohnpei data                 |
| Negros           | Wallacea   | 0   | 1   | 13074.5  | 4   | inferred from Northern Luzon data          |
| New Britain      | Melanesia  | 0   | 3   | 35144.6  | 4   | Green et al. 2008; Summerhayes et al. 2010 |
| New Guinea       | Melanesia  | 3   | 73  | 785753   | 4   | as Bismarck                                |
| New Ireland      | Melanesia  | 0   | 1   | 7404.5   | 4   | Green et al. 2008; Summerhayes et al. 2010 |
| Nias Island      | Sunda      | N/A | N/A | 4048     | 5   | Hanebuth et al. 2011                       |
| Niuafu'Ou Island | Polynesia  | 0   | 0   | 52.3     | 3   | Anderson et al. 2001                       |
| Normanby         | Melanesia  | 0   | 5   | 1040     | 4   | as Bismarck                                |
| North Island     | Polynesia  | 0   | 0   | 111582.8 | 1   | Wilmshurst et al. 2011                     |
| Nukunonu         | Polynesia  | 0   | 0   | 5.4      | 2   | Anderson, 2008                             |
| Nusi Island      | Melanesia  | 0   | 0   | 5        | 4   | as Bismarck                                |
| O'ahu            | Polynesia  | 0   | 0   | 1583.3   | 1   | Wilmshurst et al. 2011                     |
| Ofu              | Polynesia  | 0   | 0   | 7.5      | 3   | Burley et al. 2012                         |
| Olosega          | Polynesia  | 0   | 0   | 5.4      | 3   | Burley et al. 2012                         |
| Onotoa Atoll     | Polynesia  | 0   | 0   | 13.5     | 1   | inferred from Line Islands                 |
| Ontong Java      | Melanesia  | 0   | 0   | 12       | 4   | as Bismarck                                |
| Orona            | Polynesia  | 0   | 0   | 3.9      | 1   | inferred from Line Islands                 |
| Palawan          | Sunda      | 5   | 6   | 12188.6  | 5   | Cranbrook 2000                             |
| Panay            | Wallacea   | 0   | 2   | 12011.1  | 4   | inferred from Northern Luzon data          |
| Peleliu Island   | Micronesia | 0   | 0   | 12.7     | 2   | inferred from Pohnpei data                 |
| Peleng           | Wallacea   | N/A | N/A | 2345.6   | 4   | Anderson, 2005                             |
| Pitcairn         | Polynesia  | 0   | 0   | 4.2      | 1   | Anderson et al. 2002                       |
| Pohnpei          | Micronesia | 0   | 0   | 334      | 2   | McCoy et al., 2016                         |
| Polillo Island   | Wallacea   | 0   | 1   | 628.9    | 4   | inferred from Northern Luzon data          |
| Ponam            | Melanesia  | 0   | 0   | 1.4      | 4   | as Bismarck                                |
| Raoul            | Polynesia  | 0   | 0   | 29.8     | 1   | Wilmshurst et al. 2011                     |
| Raroia Atoll     | Polynesia  | 0   | 0   | 9        | 1   | West et al. 2017                           |
| Repanga          | Polynesia  | 0   | 0   | 1.94     | 1   | Wilmshurst et al. 2011                     |
| Rongelap         | Micronesia | 0   | 0   | 7.8      | 1   | West et al. 2017                           |
| Rose Atoll       | Polynesia  | 0   | 0   | 0.1      | 3   | Burley et al. 2012                         |
| Rossel           | Melanesia  | 0   | 0   | 262.5    | 4   | as Bismarck                                |
| Rurima           | Polynesia  | 0   | 0   | 0.045    | 1   | Wilmshurst et al., 2011                    |
| Saipan           | Micronesia | 0   | 0   | 122.9    | 4   | Carson et al. 2013                         |
| Samar            | Wallacea   | 0   | 2   | 12849.4  | 4   | inferred from Northern Luzon data          |
| Simeulue         | Sunda      | 0   | 2   | 1754.1   | 5   | Hanebuth et al. 2011                       |
| South Island     | Polynesia  | 0   | 0   | 145836.4 | 1   | Wilmshurst et al., 2011                    |
| Stewart          | Polynesia  | 0   | 0   | 1814.7   | 1   | Wilmshurst et al., 2011                    |
| Sulawesi         | Wallacea   | 1   | 36  | 180680.7 | 4   | Anderson, 2005                             |
| Sumatra          | Sunda      | 13  | 13  | 443065.8 | 5   | Hanebuth et al. 2011                       |
| Swains           | Polynesia  | 0   | 0   | 3.6      | 3   | Burley et al. 2012                         |
| Tahiti           | Polynesia  | 0   | 0   | 1068.8   | 1   | Wilmshurst et al. 2011                     |
| Taka Atoll       | Micronesia | 0   | 0   | 3.4      | 1   |                                            |
| Taliabu          | Wallacea   | 0   | 3   | 2913.2   | 4   | Anderson 2005                              |
| Ta'u             | Polynesia  | 0   | 0   | 45.7     | 3   | as Ofu, Olosega                            |
| Tepoto           | Polynesia  | 0   | 0   | 4        | 1   | West et al. 2017                           |
| Tinian Island    | Micronesia | 0   | 0   | 102      | 4   | Carson et al. 2013                         |
| Ugi Island       | Melanesia  | 0   | 0   | 43.98    | 4   | as Bismarck                                |
| Ulithi Atoll     | Micronesia | 0   | 0   | 4.5      | 2   | inferred from Pohnpei data                 |
| Vanatinai        | Melanesia  | 0   | 3   | 830      | 4   | as Bismarck                                |
| Vostok           | Polynesia  | 0   | 0   | 0.2      | 1   | Wilmshurst et al., 2011                    |
| Wake Island      | Micronesia | 0   | 0   | 7.1      | N/A |                                            |
| Whakaari         | Polynesia  | 0   | 0   | 3.25     | 1   | Wilmshurst et al., 2011                    |
| Woodlark         | Melanesia  | 0   | 2   | 873.9    | 4   | as Bismarck                                |
