# Supplementary material for: Effect of isolation on coat colour polymorphism of Polynesian rats in Island Southeast Asia and the Pacific
Source: PubMed Central journal article supplement (PMC6511229; doi:10.7717/peerj.6894), 2019-05-08

A

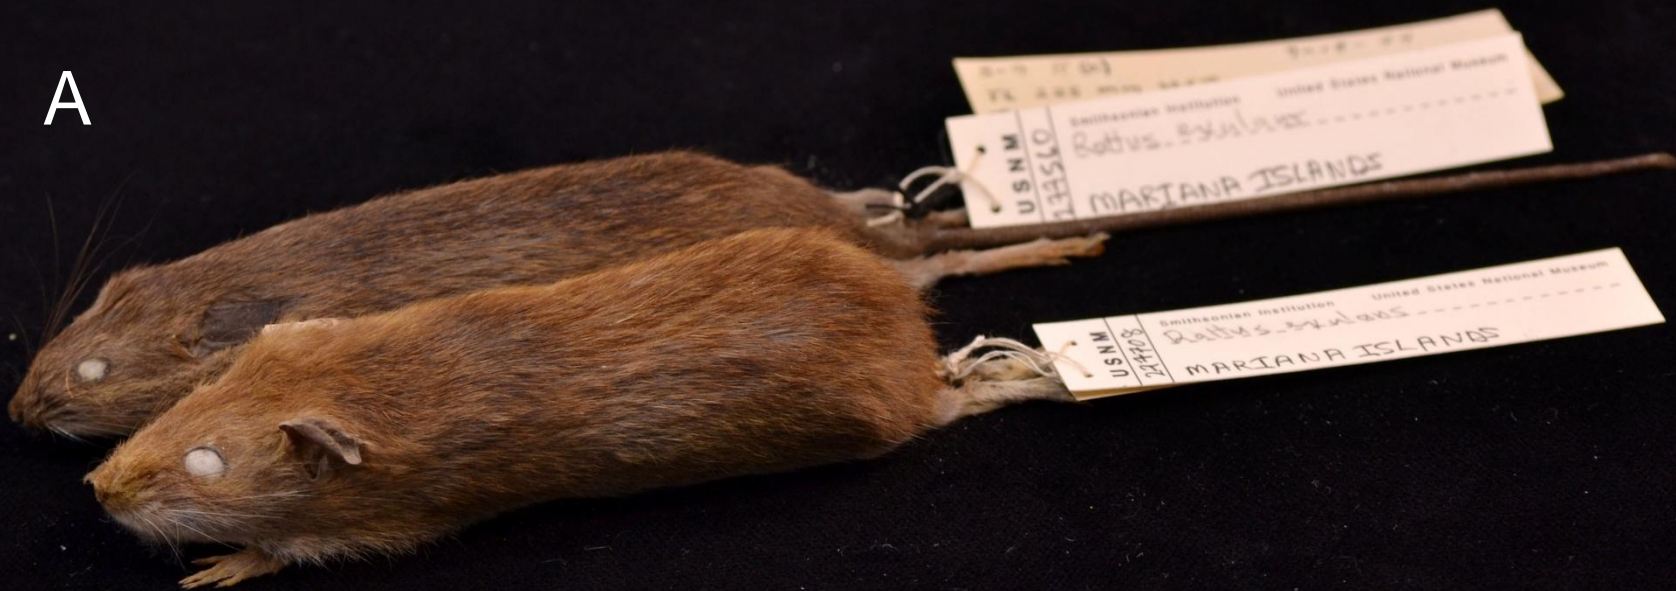

B

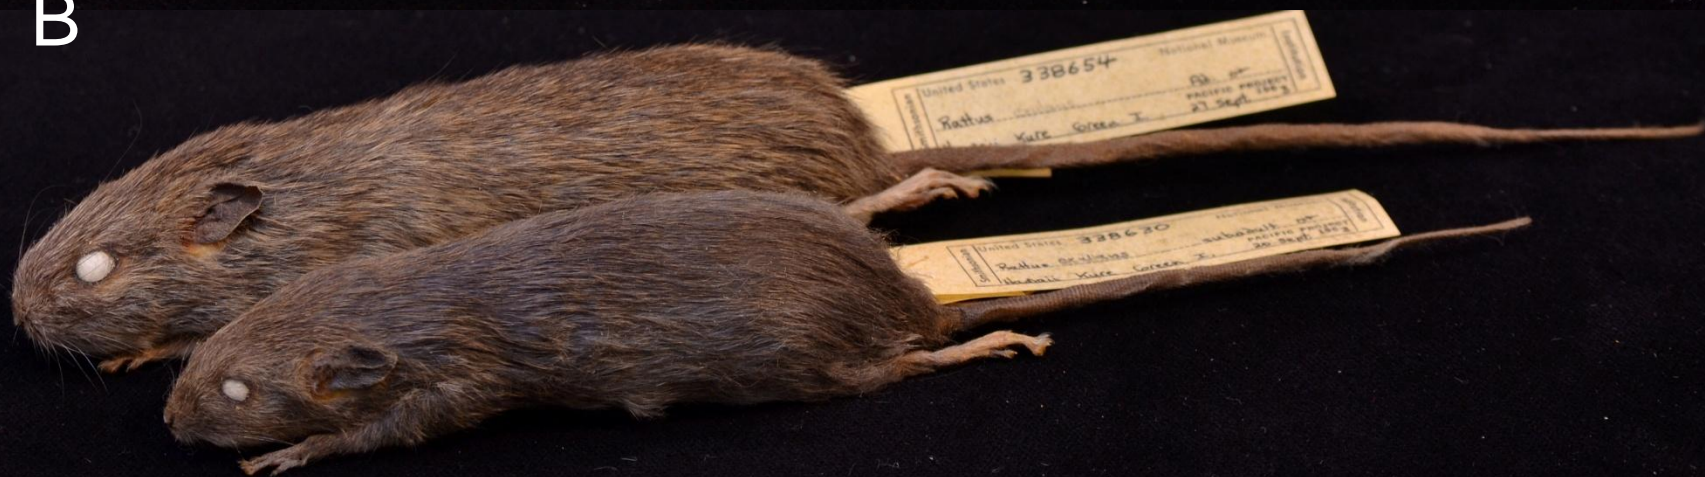

C

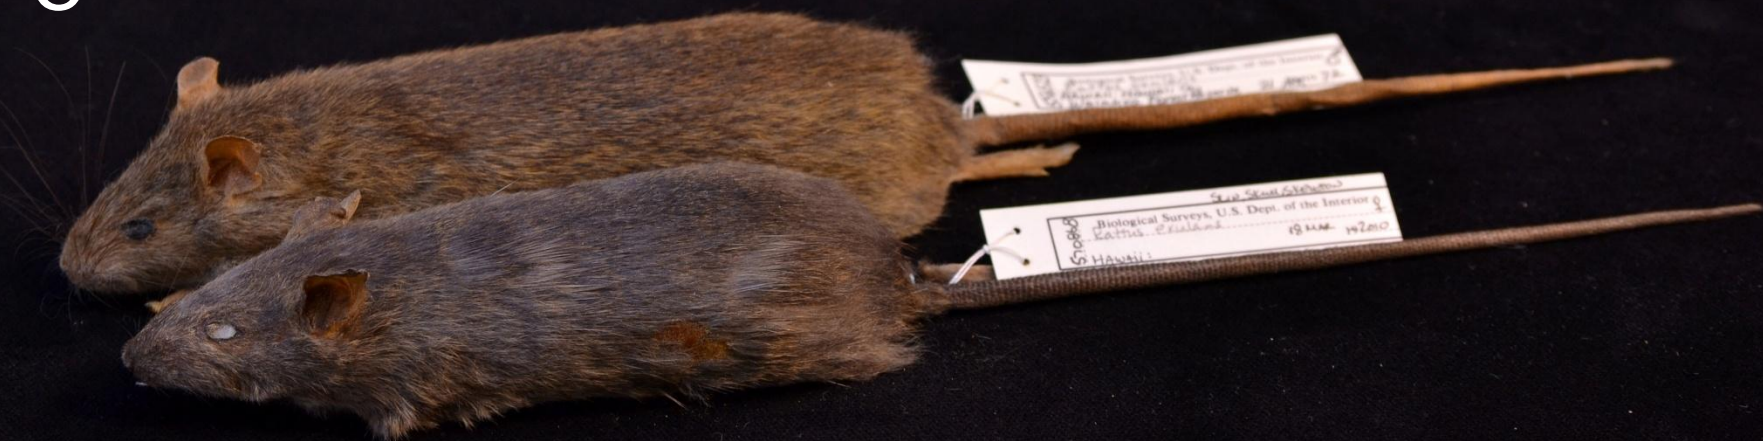

Supplement: peerj-07-6894-s006.pdf [file peerj-07-6894-s006.pdf]
